# Supplementary material for: C@PA: Computer-Aided Pattern Analysis to Predict Multitarget ABC Transporter Inhibitors
Source: PubMed Central journal article supplement (PMC8041314; doi:10.1021/acs.jmedchem.0c02199), 2021-03-16
Supplement: jm0c02199_si_003.pdf [file jm0c02199_si_003.pdf]

## Supporting Information.

### **C@PA: Computer-aided Pattern Analysis to Predict Multitarget ABC Transporter Inhibitors**

*Vigneshwaran Namasivayam<sup>a</sup>, Katja Silbermann<sup>a</sup>, Michael Wiese<sup>a</sup>, Jens Pahnke<sup>b,c,d,e</sup>,  
Sven Marcel Stefan<sup>\*,a,b,f</sup>*

<sup>a</sup> Department of Pharmaceutical and Cellbiological Chemistry, University of Bonn,  
An der Immenburg 4, 53121 Bonn, Germany

<sup>b</sup> Department of Neuro-/Pathology, University of Oslo and Oslo University  
Hospital, Sognsvannsveien 20, 0372 Oslo, Norway

<sup>c</sup> LIED, University of Lübeck, Ratzenburger Allee 160, 23538 Lübeck, Germany

<sup>d</sup> Department of Pharmacology, Faculty of Medicine, University of Latvia, Jelgava  
Iela, 1004 Riga, Latvia

<sup>e</sup> Department of Bioorganic Chemistry, Leibniz-Institute of Plant Biochemistry,  
Weinberg 3, 06120 Halle, Germany

<sup>f</sup> Cancer Drug Resistance and Stem Cell Program, University of Sydney, Kolling  
Building, 10 Westbourne Street, Sydney, New South Wales 2065, Australia.

\* Corresponding author: Sven Marcel Stefan (s.m.stefan@medisin.uio.no)

## **Table of contents.**

*Supplementary Figure 1 A–F:* Concentration-effect curves of compound **15** against ABCB1 (A and D), ABCC1 (B and E), and ABCG2 (C and F) as determined in calcein AM (A and B), pheophorbide A (C), Hoechst 33342 (D and F), and daunorubicin (E) assays.

*Supplementary Figure 2 A–F:* Concentration-effect curves of compound **18** against ABCB1 (A and D), ABCC1 (B and E), and ABCG2 (C and F) as determined in calcein AM (A and B), pheophorbide A (C), Hoechst 33342 (D and F), and daunorubicin (E) assays.

*Supplementary Figure 3 A–F:* Concentration-effect curves of compound **22** against ABCB1 (A and D), ABCC1 (B and E), and ABCG2 (C and F) as determined in calcein AM (A and B), pheophorbide A (C), Hoechst 33342 (D and F), and daunorubicin (E) assays.

*Supplementary Figure 4 A–F:* Concentration-effect curves of compound **26** against ABCB1 (A and D), ABCC1 (B and E), and ABCG2 (C and F) as determined in calcein AM (A and B), pheophorbide A (C), Hoechst 33342 (D and F), and daunorubicin (E) assays.

*LC-MS data and NMR spectra of compounds 11–33.*

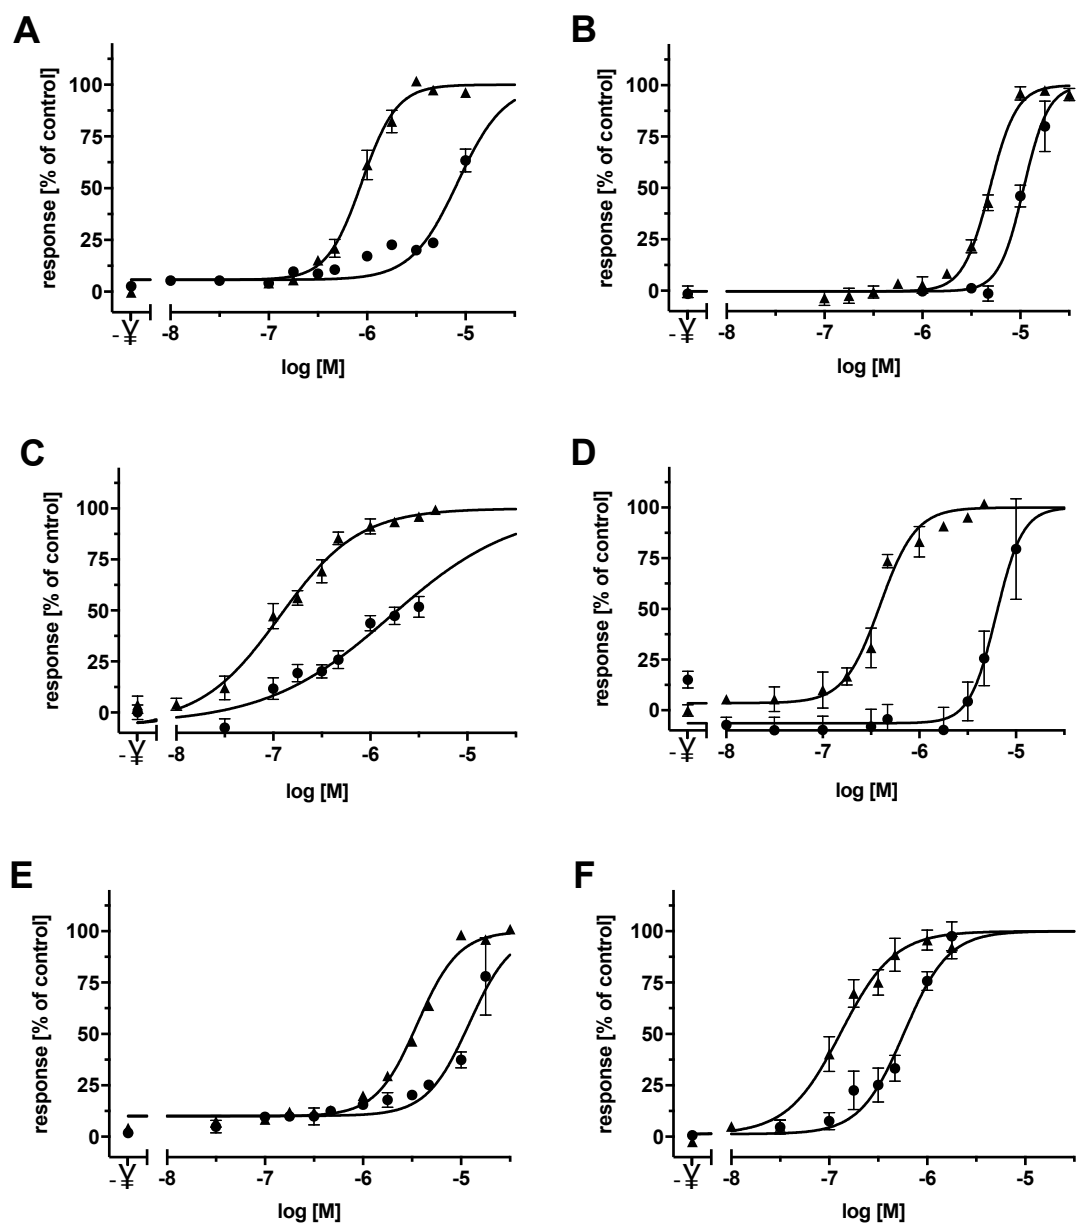

*Supplementary Figure 1 A–F:* Concentration-effect curves of compound **15** (●) as determined in calcein AM (A and B), pheophorbide A (C), Hoechst 33342 (D and F), and daunorubicin (E) assays using either ABCB1-overexpressing A2780/ADR cells (A and D), ABCC1-overexpressing H69AR cells (B and E), or ABCG2-overexpressing MDCK II BCRP cells (C and F). Data were normalized by defining the effect of 10  $\mu$ M cyclosporine A (▲; A, B, D, and E) and compound **34** (▲; C and F) as positive control (100%) and buffer medium was used as negative control (0%). Shown is mean  $\pm$  SEM of at least three independent experiments.

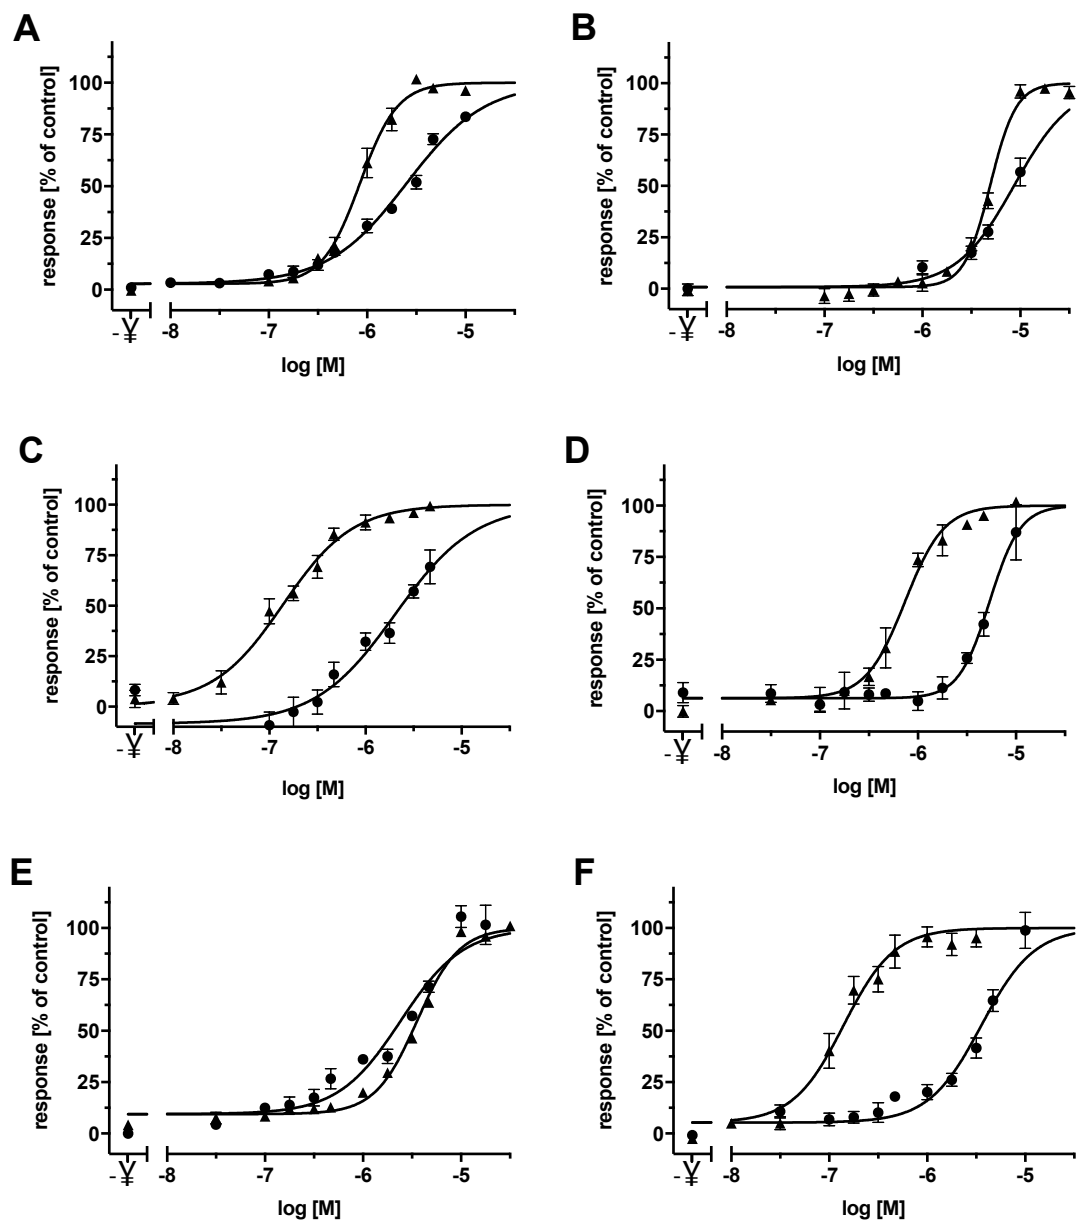

*Supplementary Figure 2 A–F*: Concentration-effect curves of compound **18** (●) as determined in calcein AM (A and B), pheophorbide A (C), Hoechst 33342 (D and F), and daunorubicin (E) assays using either ABCB1-overexpressing A2780/ADR cells (A and D), ABCC1-overexpressing H69AR cells (B and E), or ABCG2-overexpressing MDCK II BCRP cells (C and F). Data were normalized by defining the effect of 10  $\mu$ M cyclosporine A (▲; A, B, D, and E) and compound **34** (▲; C and F) as positive control (100%) and buffer medium was used as negative control (0%). Shown is mean  $\pm$  SEM of at least three independent experiments.

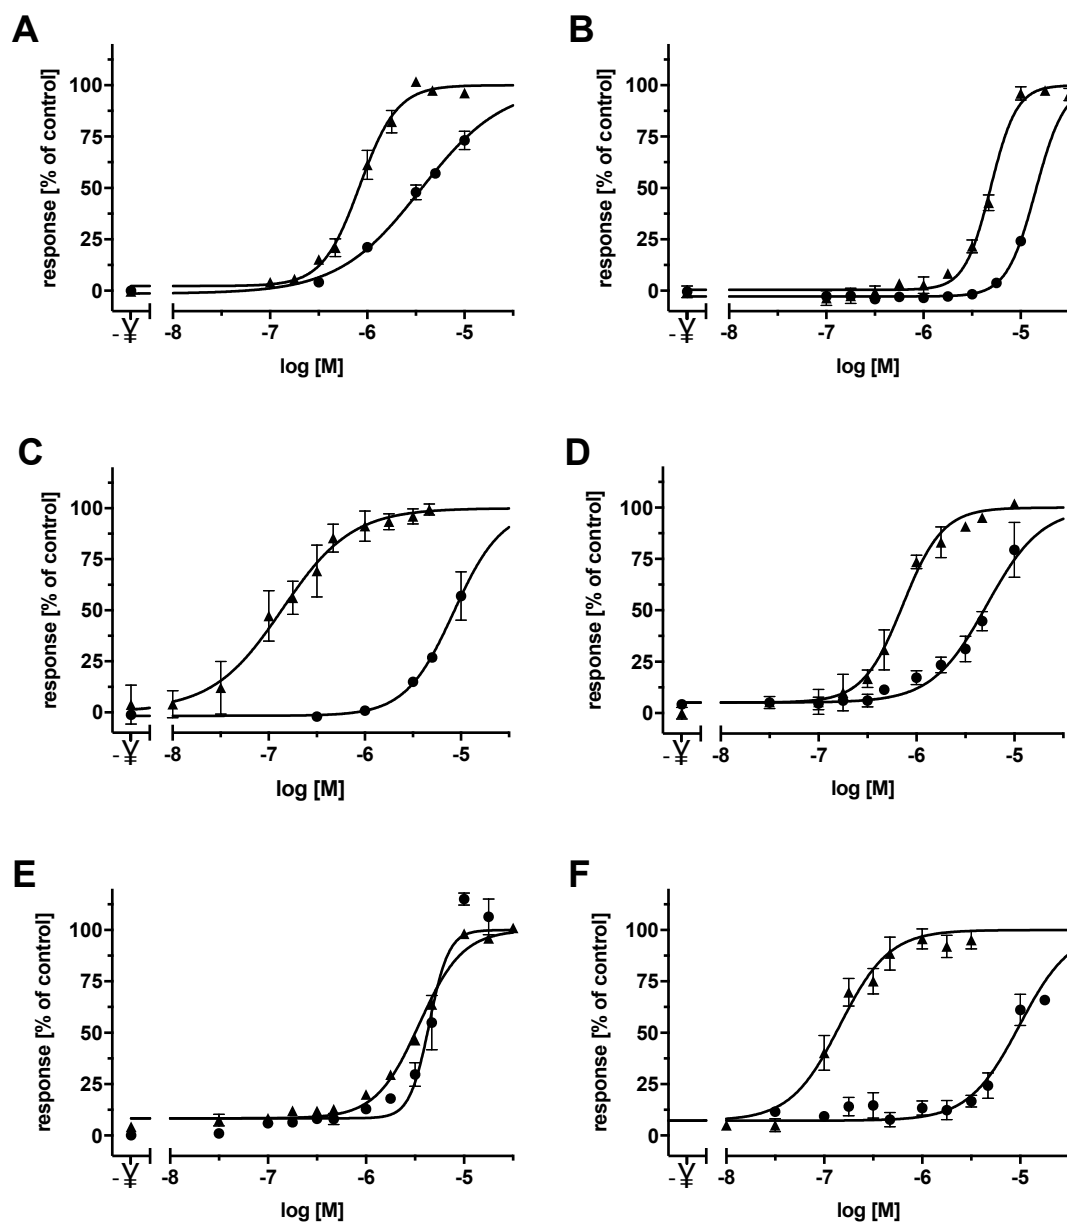

*Supplementary Figure 3 A–F*: Concentration-effect curves of compound **22** (●) as determined in calcein AM (A and B), pheophorbide A (C), Hoechst 33342 (D and F), and daunorubicin (E) assays using either ABCB1-overexpressing A2780/ADR cells (A and D), ABCC1-overexpressing H69AR cells (B and E), or ABCG2-overexpressing MDCK II BCRP cells (C and F). Data were normalized by defining the effect of 10  $\mu$ M cyclosporine A (▲; A, B, D, and E) and compound **34** (▲; C and F) as positive control (100%) and buffer medium was used as negative control (0%). Shown is mean  $\pm$  SEM of at least three independent experiments.

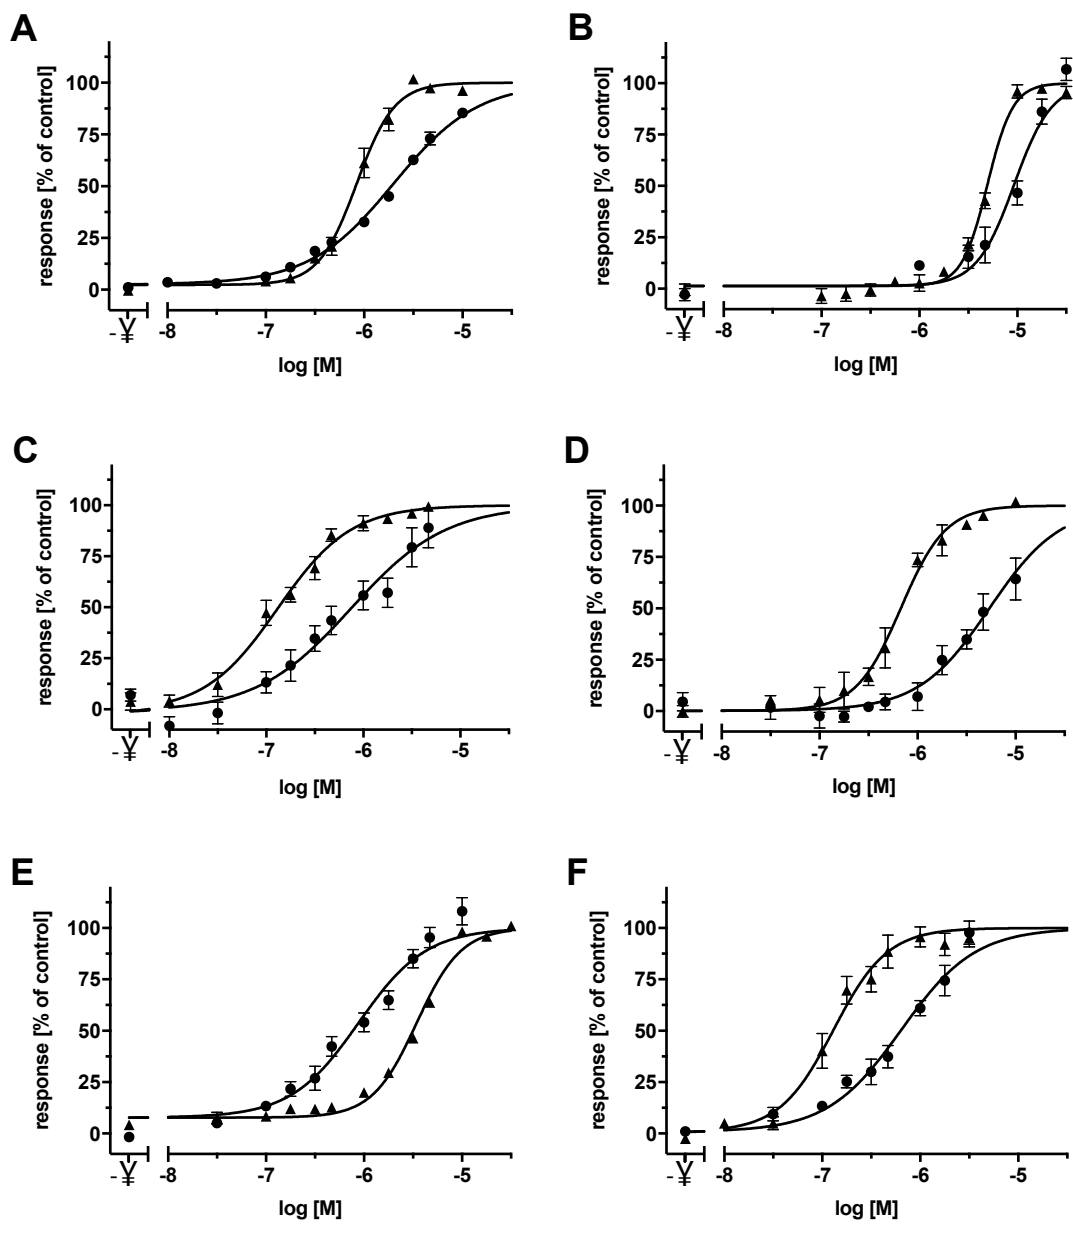

*Supplementary Figure 4 A–F*: Concentration-effect curves of compound **26** (●) as determined in calcein AM (A and B), pheophorbide A (C), Hoechst 33342 (D and F), and daunorubicin (E) assays using either ABCB1-overexpressing A2780/ADR cells (A and D), ABCC1-overexpressing H69AR cells (B and E), or ABCG2-overexpressing MDCK II BCRP cells (C and F). Data were normalized by defining the effect of 10  $\mu$ M cyclosporine A (▲; A, B, D, and E) and compound **34** (▲; C and F) as positive control (100%) and buffer medium was used as negative control (0%). Shown is mean  $\pm$  SEM of at least three independent experiments.

# Compound 11

Sample H2658185

0.1%FA-ACN 5-95%ACN 6 min. Zorbax-Eclipse-Plus C18 4,6 x 100mm, 3.5  $\mu$ m.

| # | Time  | Area%  |
|---|-------|--------|
| 1 | 4.575 | 100.00 |

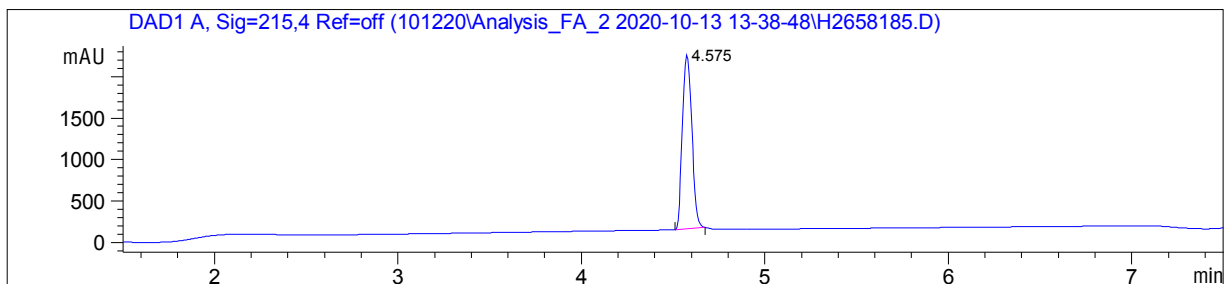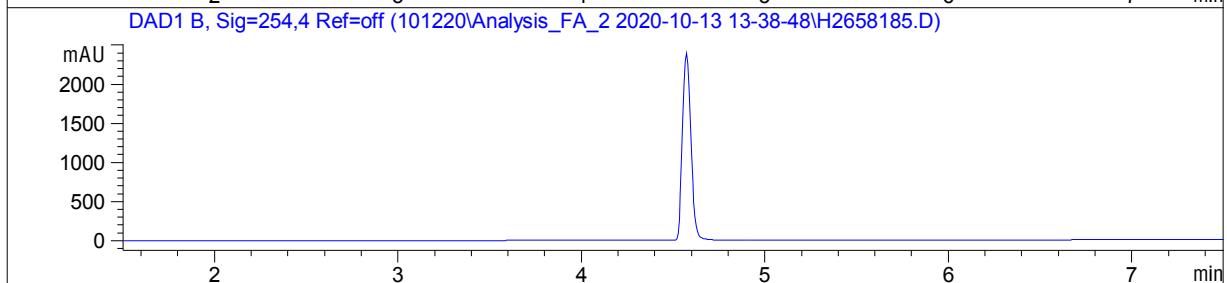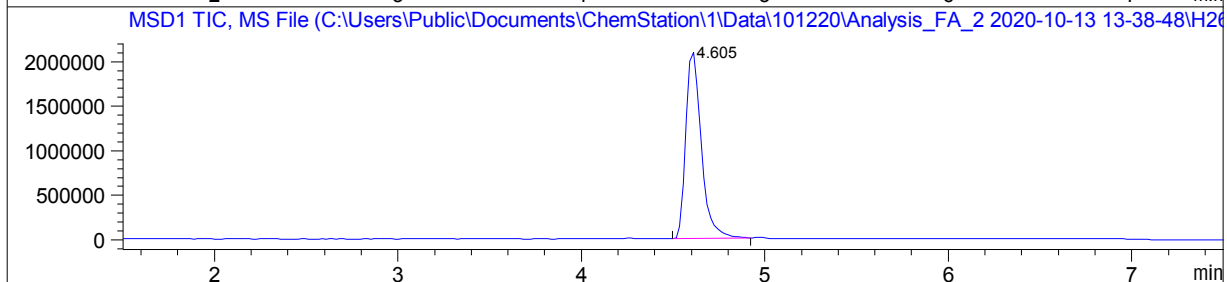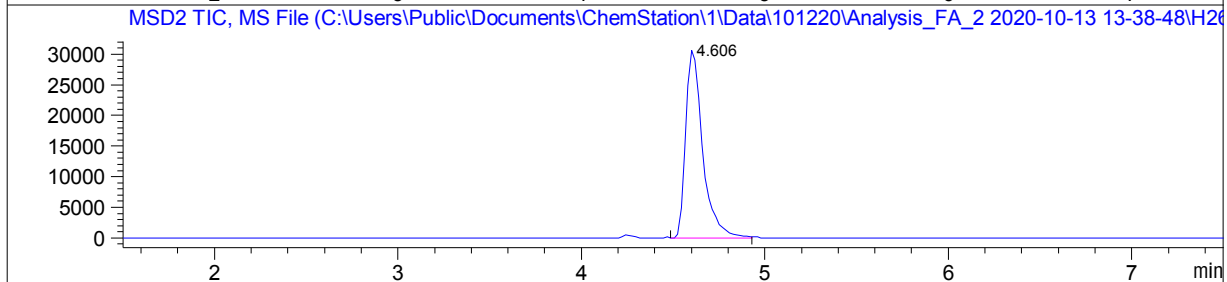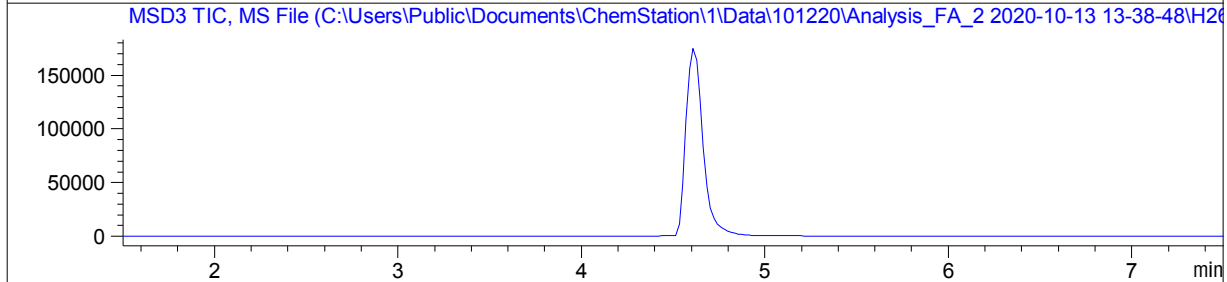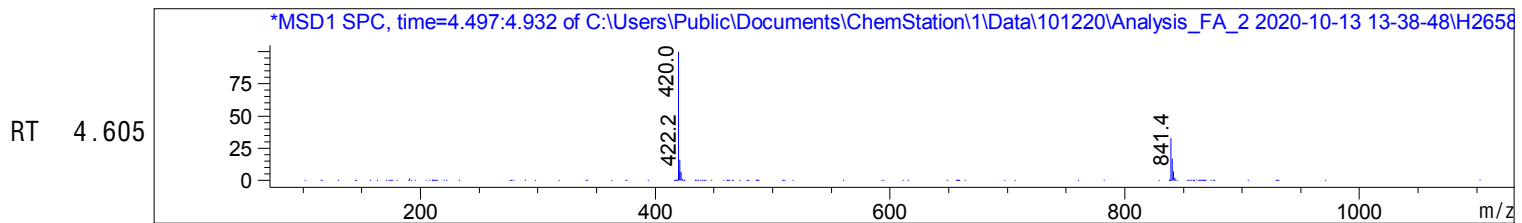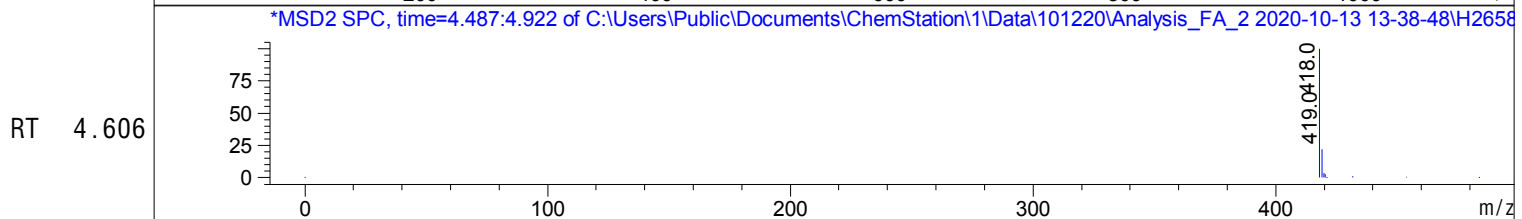

H2658185

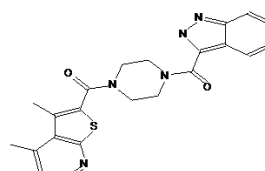

H2658185 C22H21N5O2S 419.50

# Compound 11

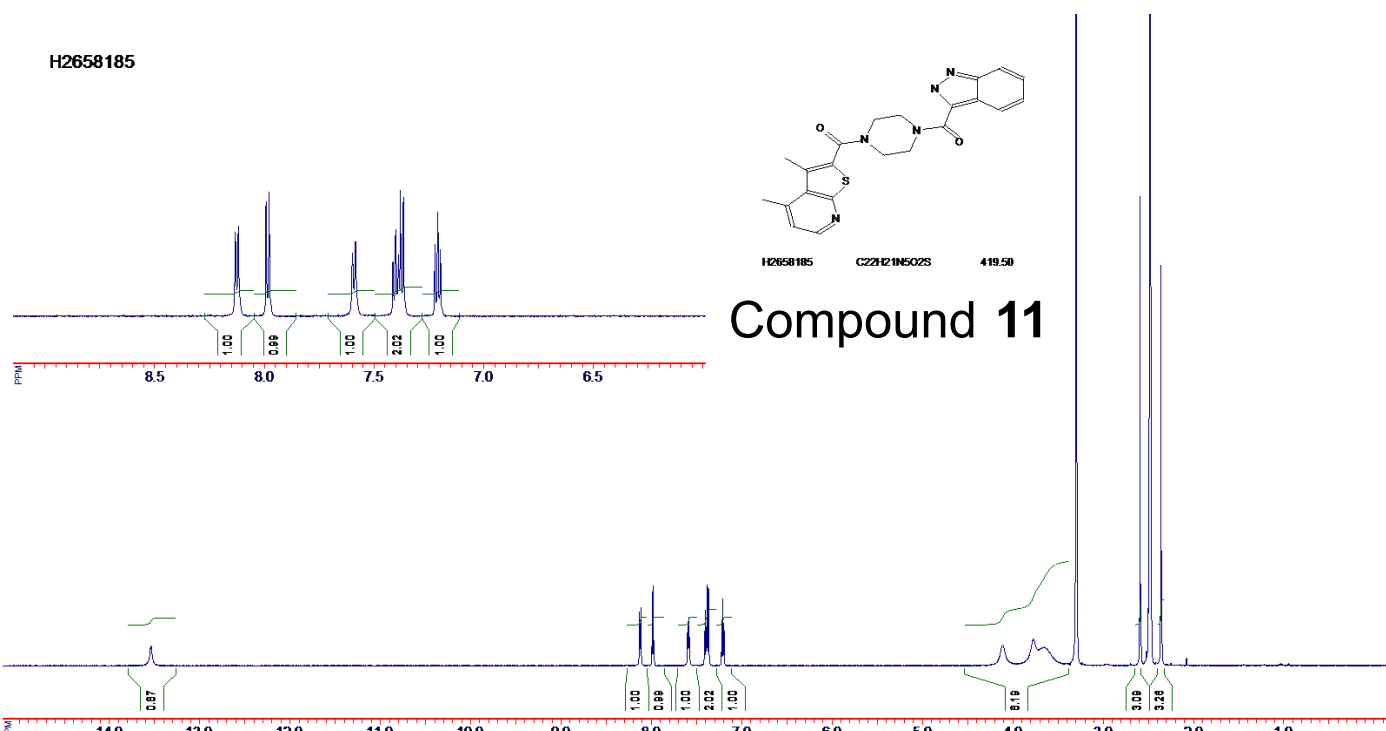

|                     |               |                  |           |                            |           |
|---------------------|---------------|------------------|-----------|----------------------------|-----------|
| File name: H2658185 | Host:char     | SF: 599.7811 MHz | NSC: 0    | PW: 4.40 usec, RG: 44      | SE 131072 |
| Date: 26-Nov-2020   | Solvent: dmsd | SW: 11364 Hz     | TE: 298 K | AQ: 2.82 sec, RD: 0.00 sec | H2658185  |



# Compound 12

Sample H2660984

0.1%FA-ACN 5-95%ACN 6 min. Zorbax-Eclipse-Plus C18 4,6 x 100mm, 3.5  $\mu$ m.

| # | Time  | Area%  |
|---|-------|--------|
| 1 | 5.113 | 100.00 |

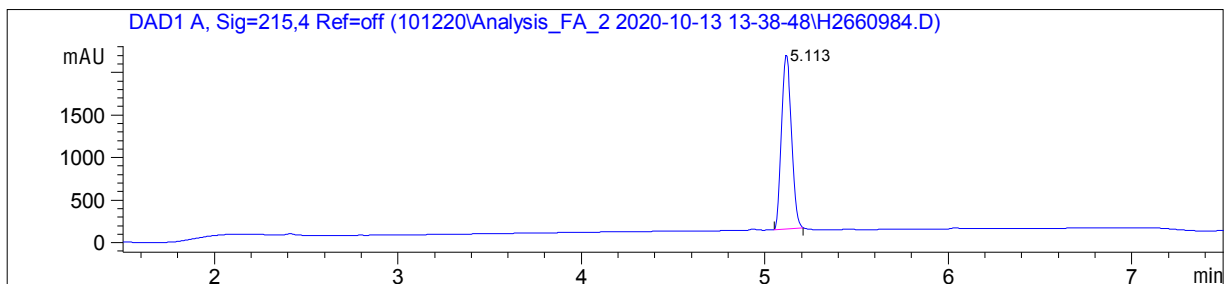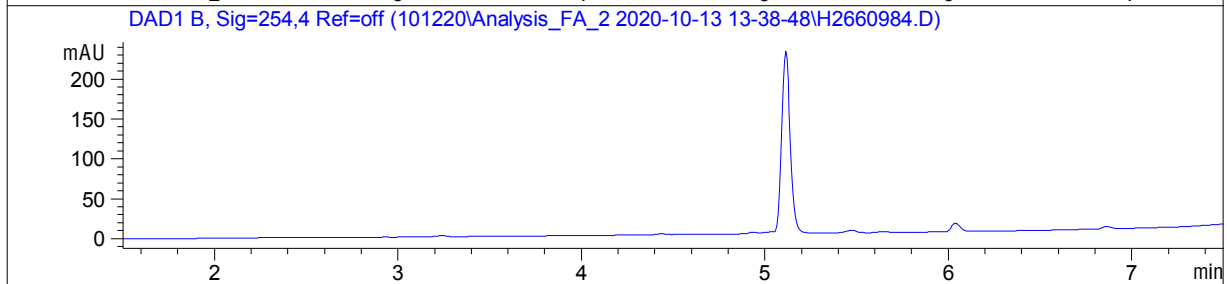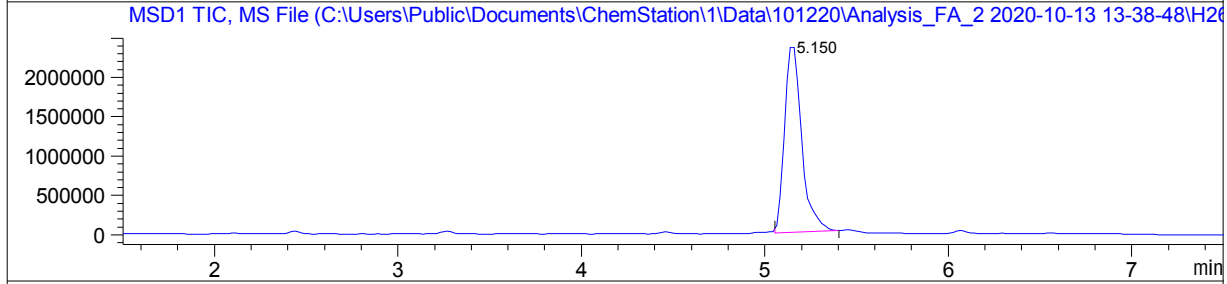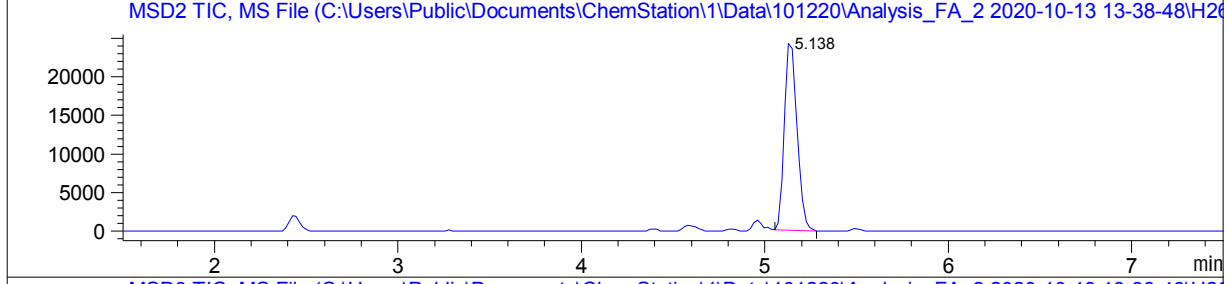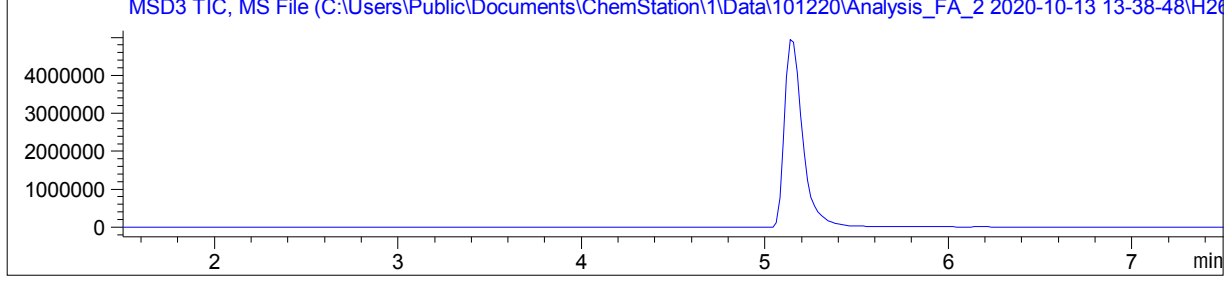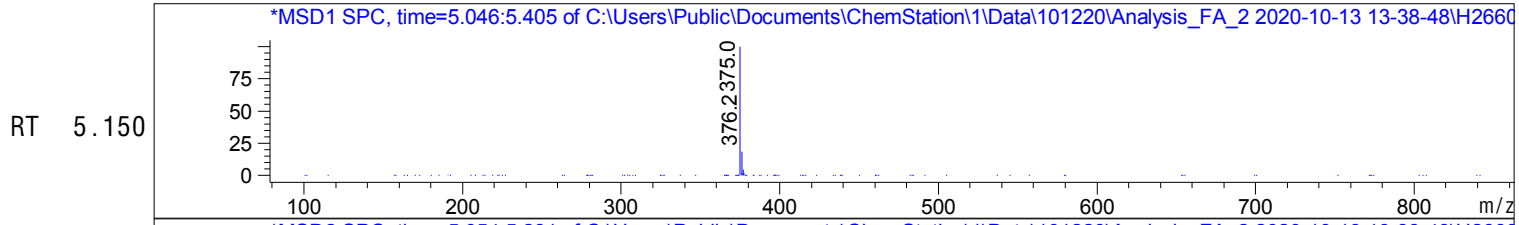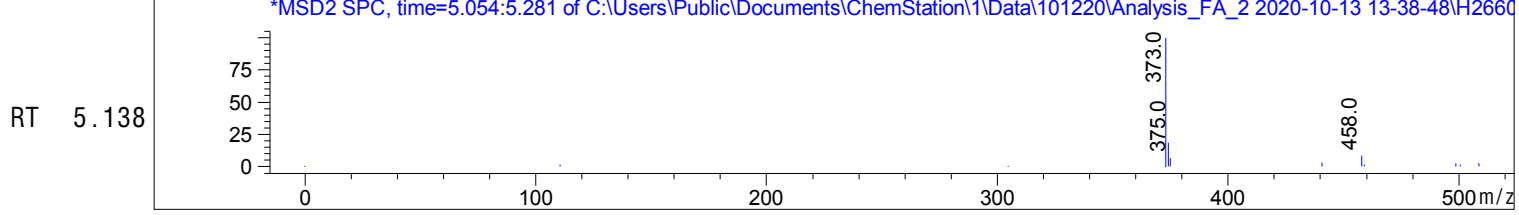

H2660984

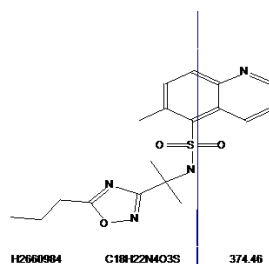

# Compound 12

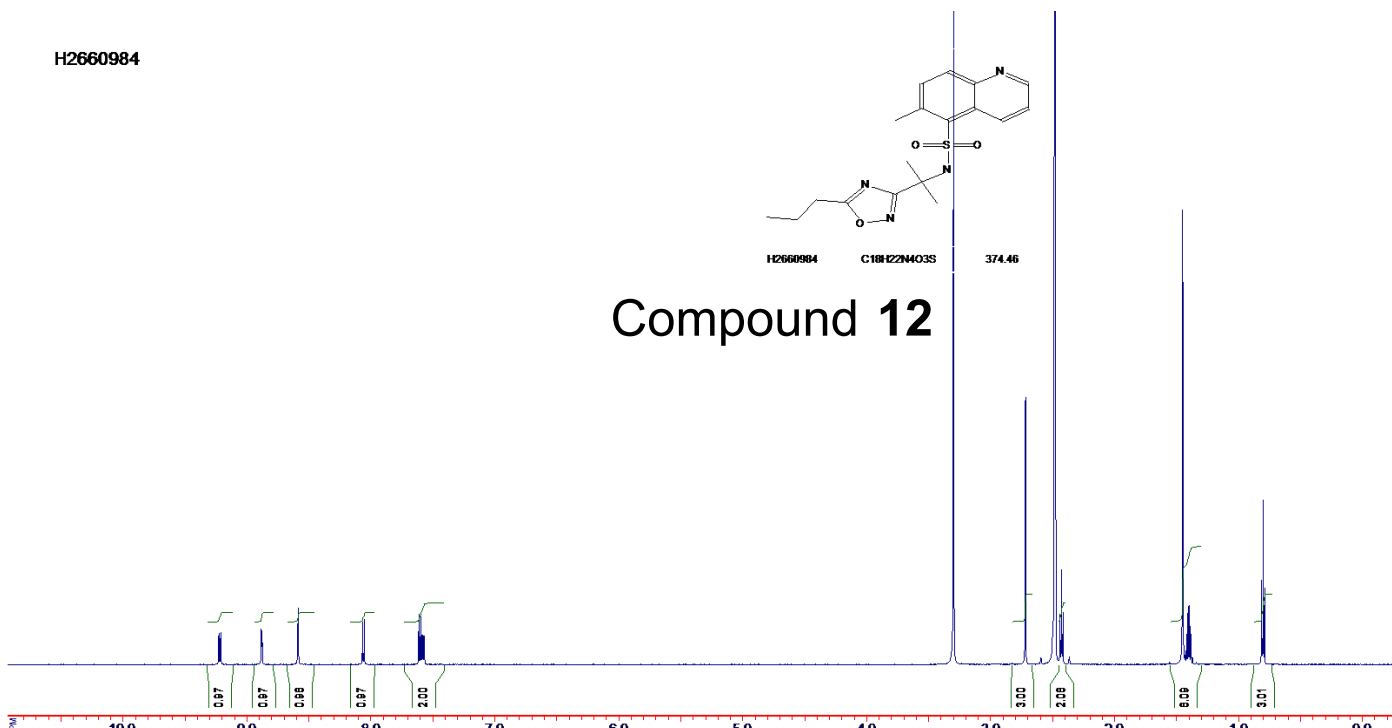

|                     |               |                  |           |                            |            |
|---------------------|---------------|------------------|-----------|----------------------------|------------|
| File name: H2660984 | Host: char    | SF: 599.7811 MHz | NSC: 0    | PW: 4.40 usec, RG: 44      | SE: 131072 |
| Date: 26-Nov-2020   | Solvent: dms0 | SW: 11364 Hz     | TE: 298 K | AQ: 2.82 sec, RD: 0.00 sec | H2660984   |

# Compound 13

MaxPeak: 100.00%  
Ret\_Time: 0.981 min

## S089997\$2

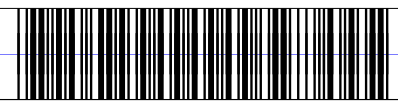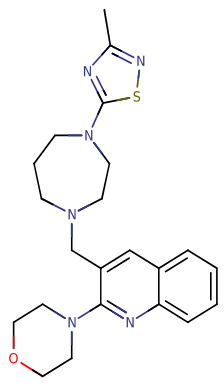

Mol Wt 424.56

Exact Mass 424.24

| # | Time  | Area%  |
|---|-------|--------|
| 1 | 0.981 | 100.00 |

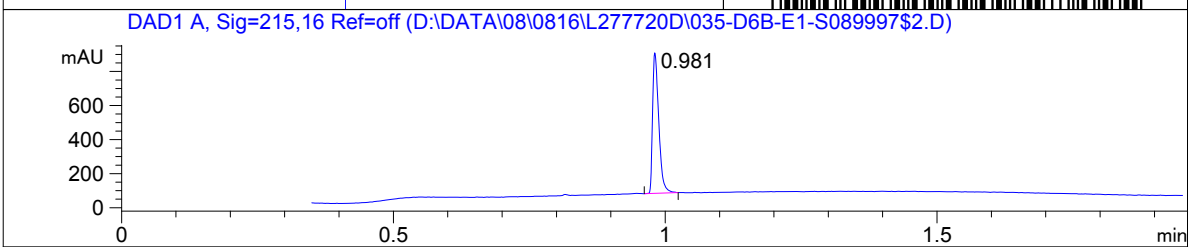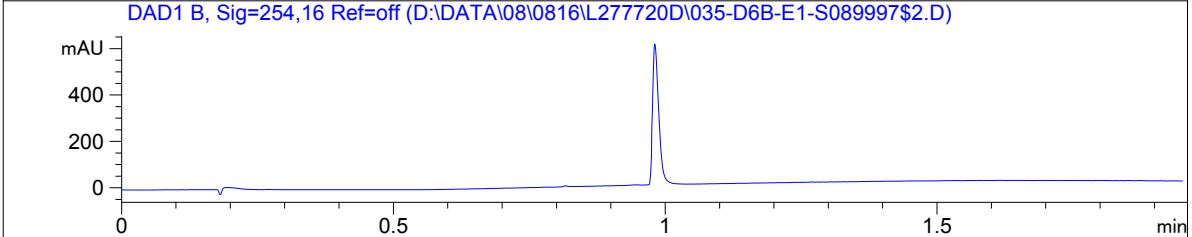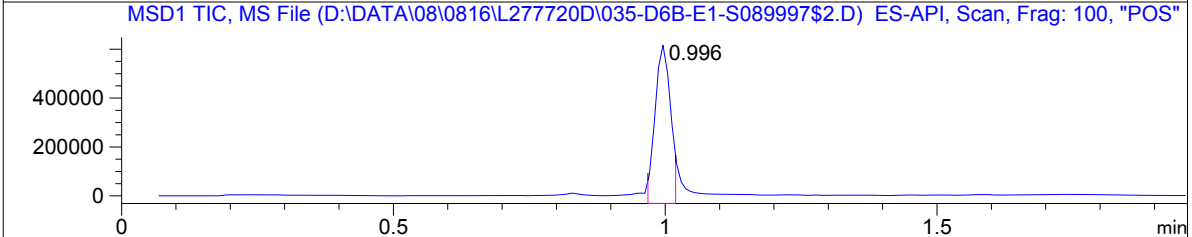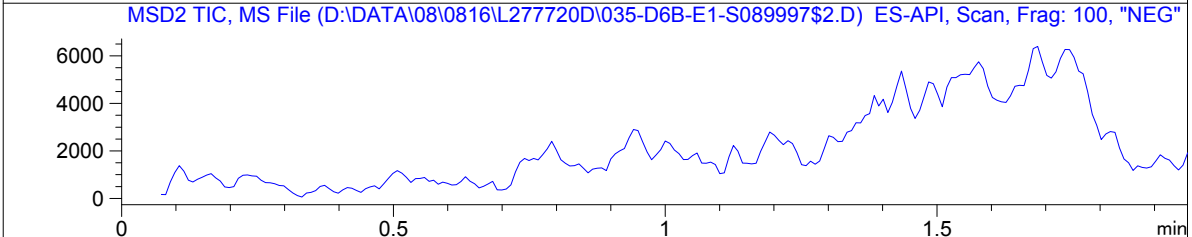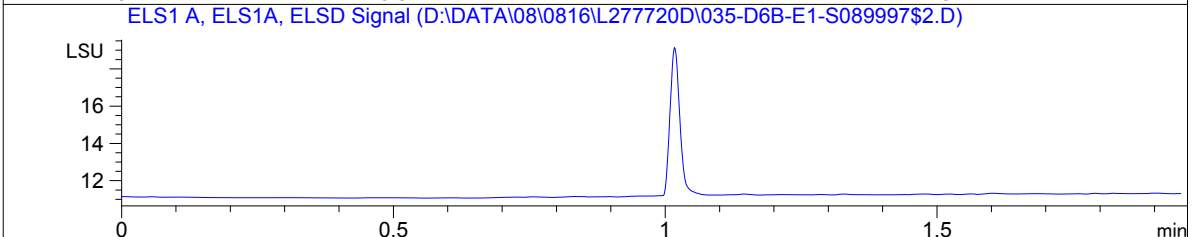

RT 0.996

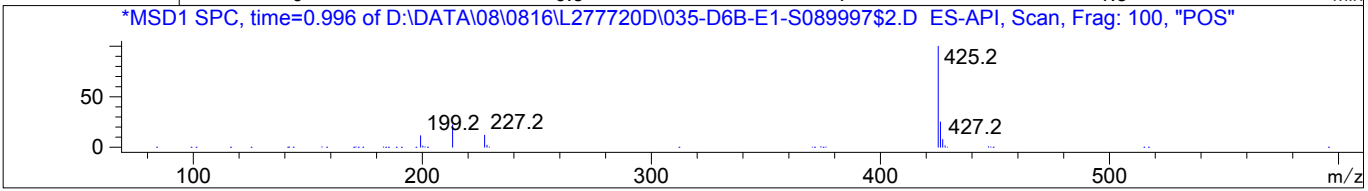

H2562999

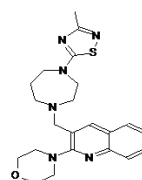

H2562999 C21H28N6OS 424.56

# Compound 13

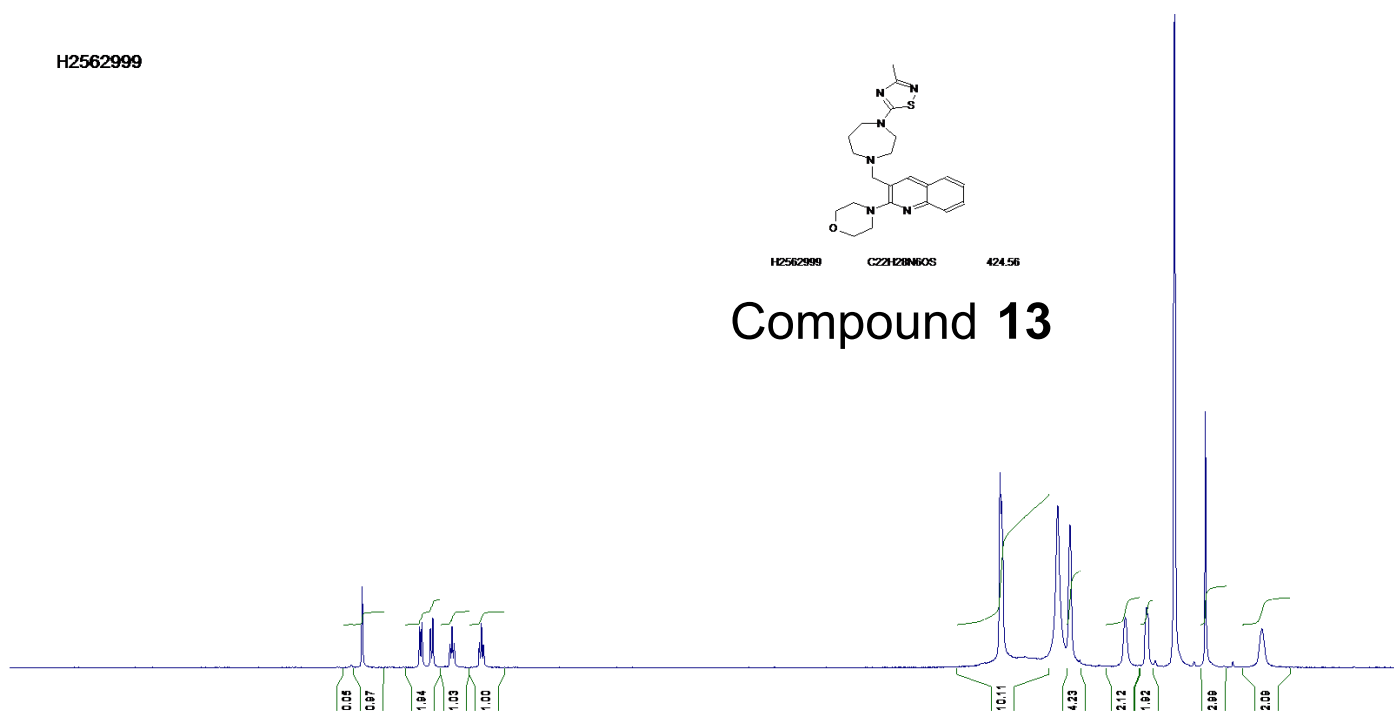

|                     |               |                  |           |                            |           |
|---------------------|---------------|------------------|-----------|----------------------------|-----------|
| File name: H2562999 | Host:char     | SF: 499.8203 MHz | NSC: 0    | PW: 12.40 usec, RG: 14     | SE: 65636 |
| Date: 01-Dec-2020   | Solvent: dms0 | SW: 9542 Hz      | TE: 298 K | AQ: 1.68 sec, RD: 0.00 sec | H2562999  |

# Compound 14

MaxPeak: 97.99%  
Ret\_Time: 0.999 min

## S089976\$2

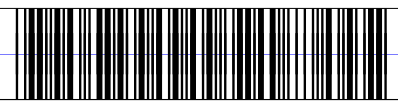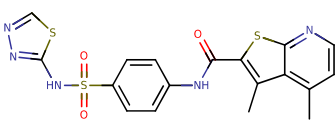

**Mol Wt** 445.54  
**Exact Mass** 445.03

| # | Time  | Area% |
|---|-------|-------|
| 1 | 0.892 | 2.01  |
| 2 | 0.999 | 97.99 |

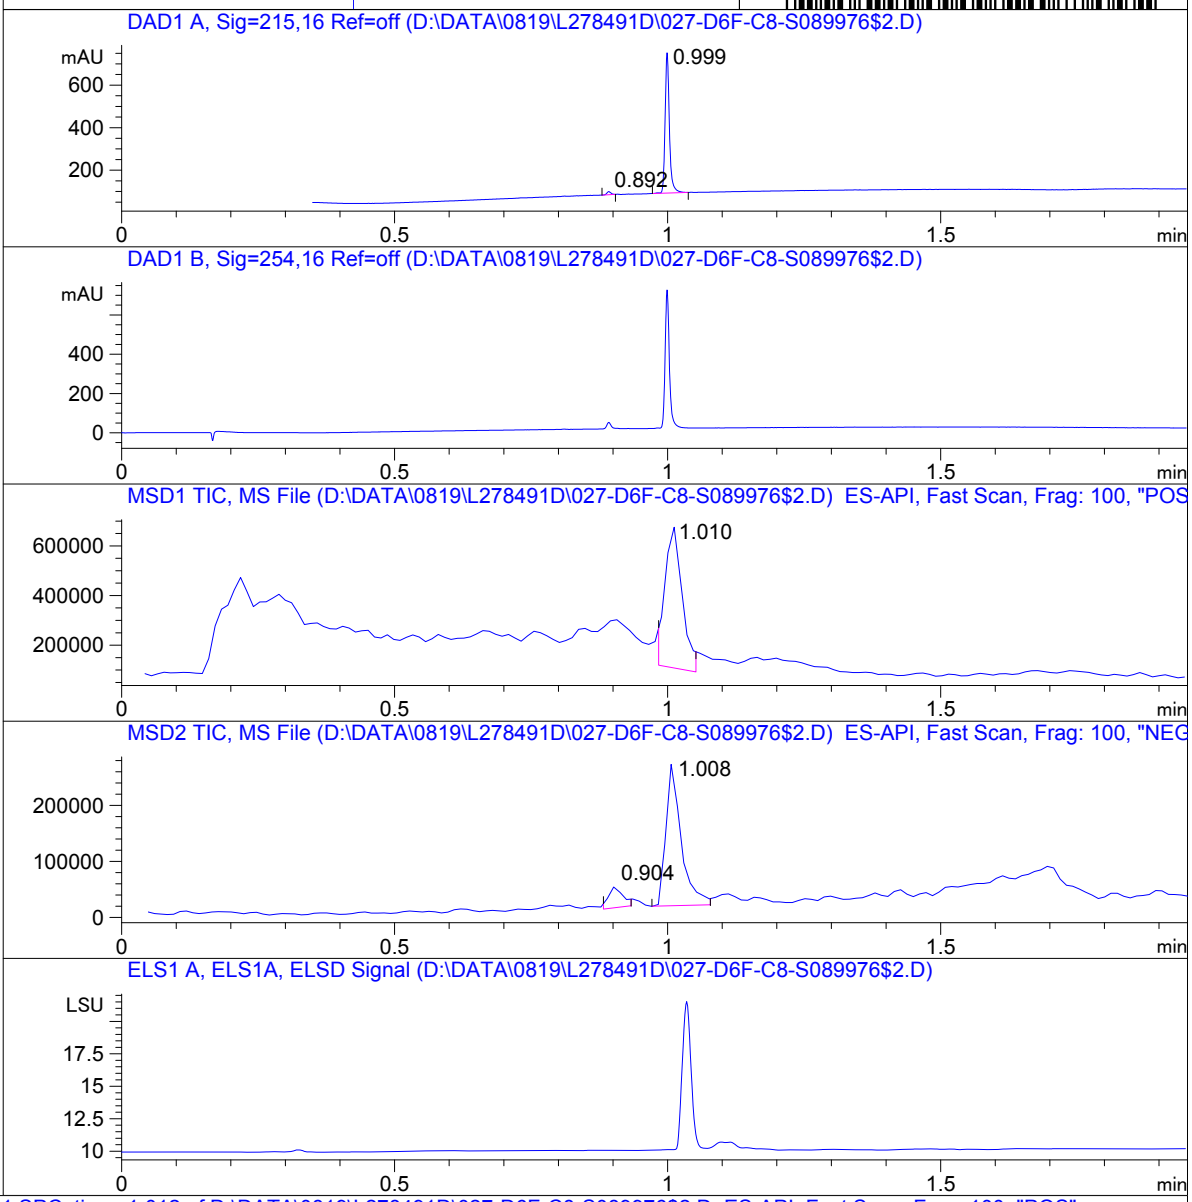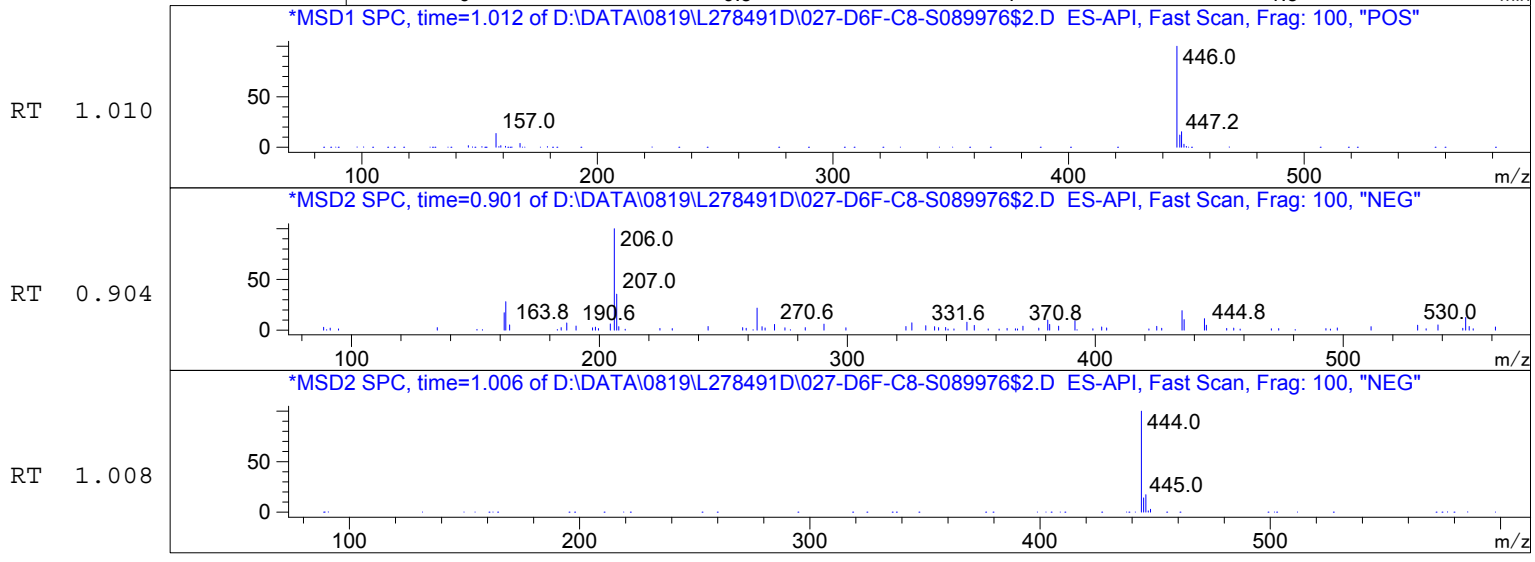

H2565358

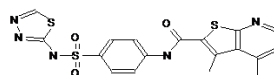

H2565358 C18H15N5O3S3 445.53

# Compound 14

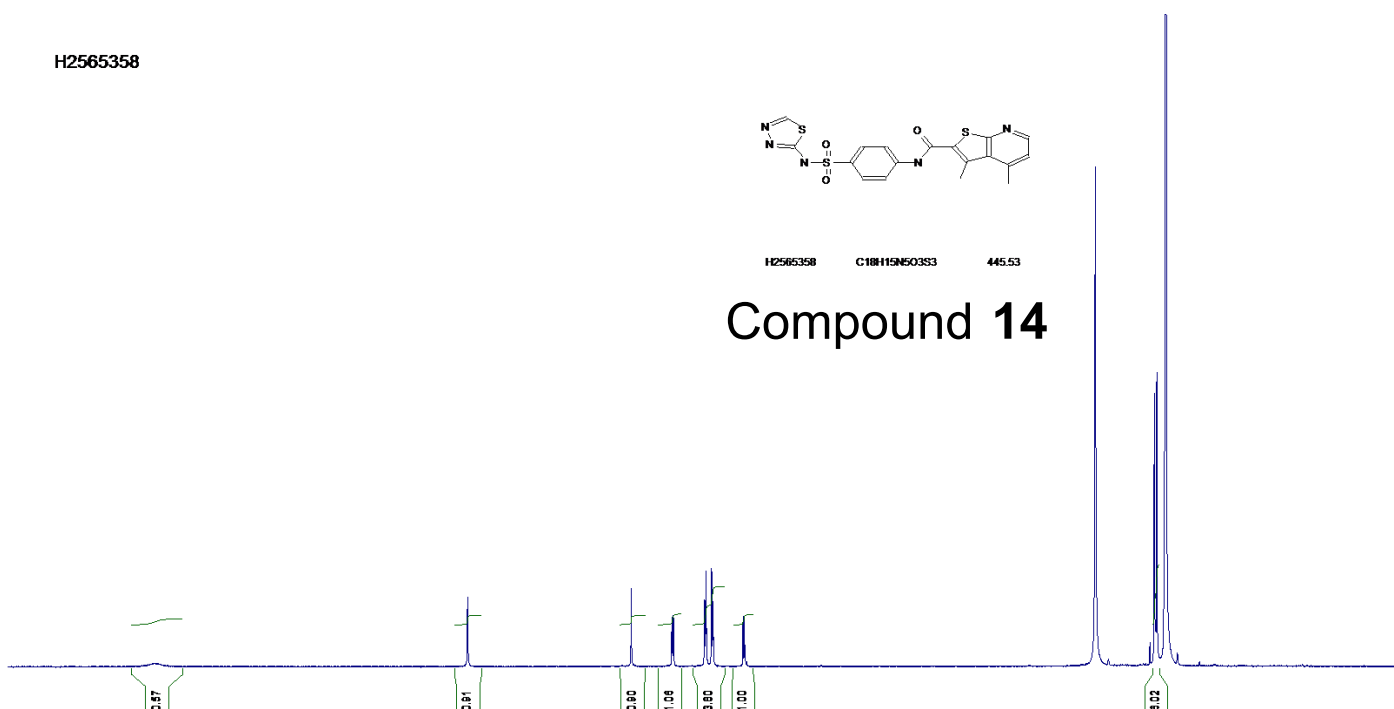

|                     |               |                  |           |                            |           |
|---------------------|---------------|------------------|-----------|----------------------------|-----------|
| File name: H2565358 | Host: Hachar  | SF: 499.8207 MHz | NSC: 0    | PW: 6.60 usec, RG: 40      | SE 131072 |
| Date: 01-Dec-2020   | Solvent: dmso | SW: 11364 Hz     | TE: 298 K | AQ: 2.82 sec, RD: 0.00 sec | H2565358  |

# Compound 15

## S491337\$21

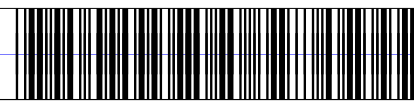

MaxPeak: 95.91%  
Ret\_Time: 1.070 min

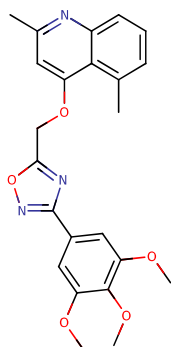

Mol Wt 421.45  
Exact Mass 421.18

| # | Time  | Area% |
|---|-------|-------|
| 1 | 0.865 | 1.97  |
| 2 | 1.005 | 2.12  |
| 3 | 1.070 | 95.91 |

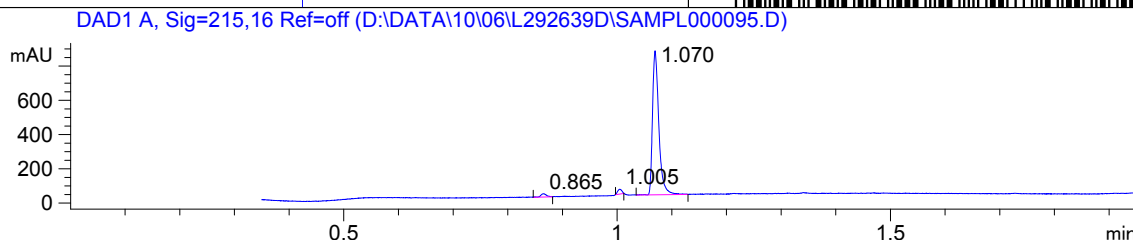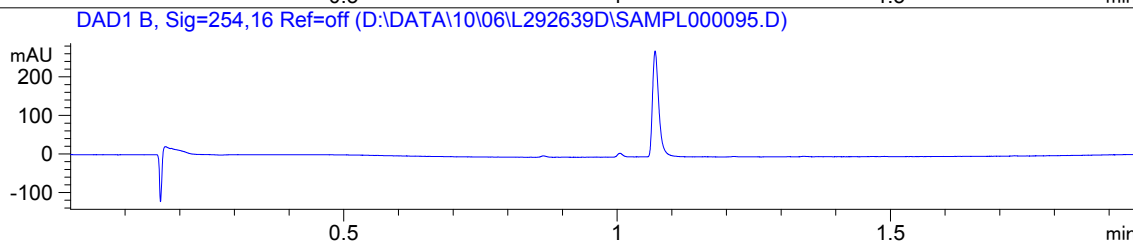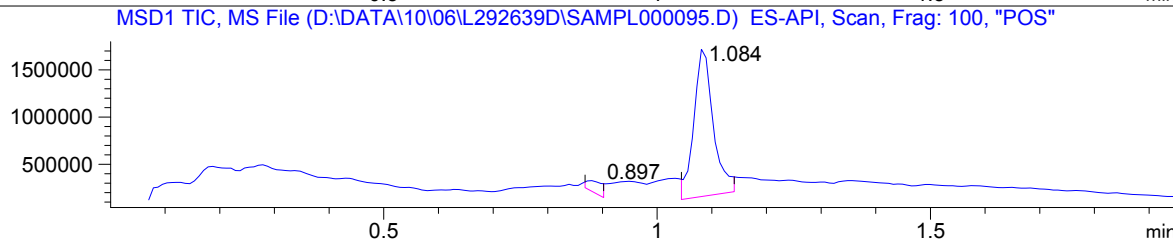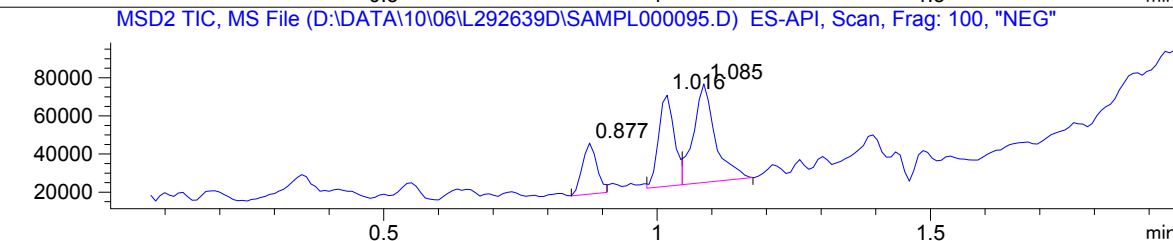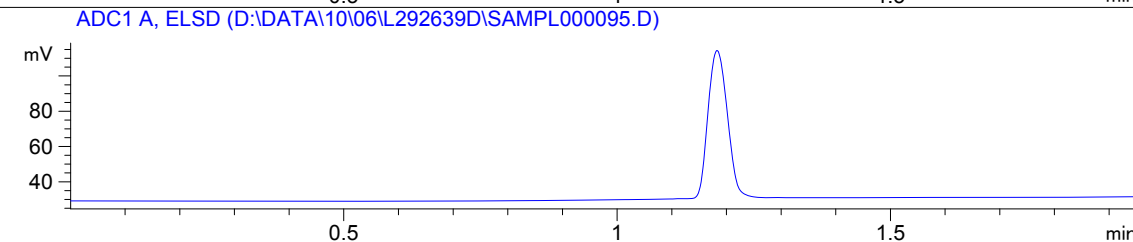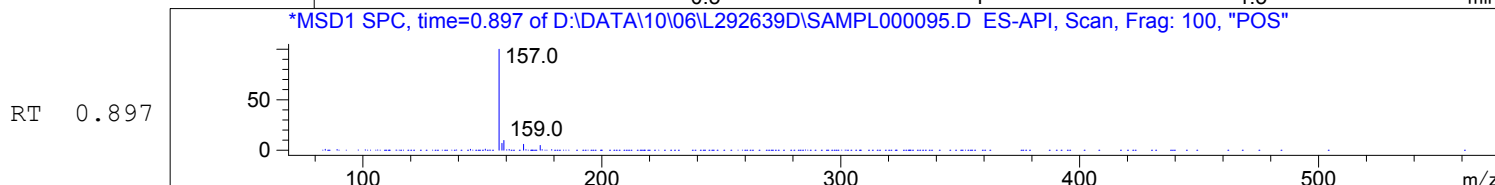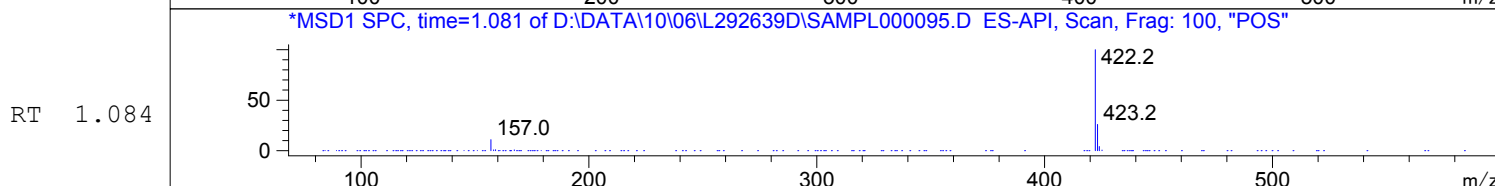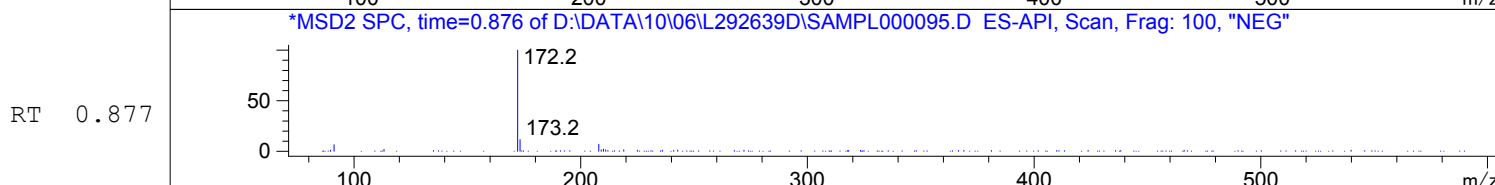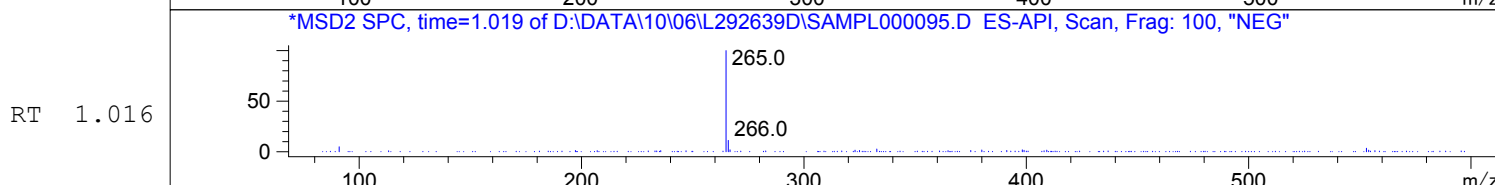

RT 1.085

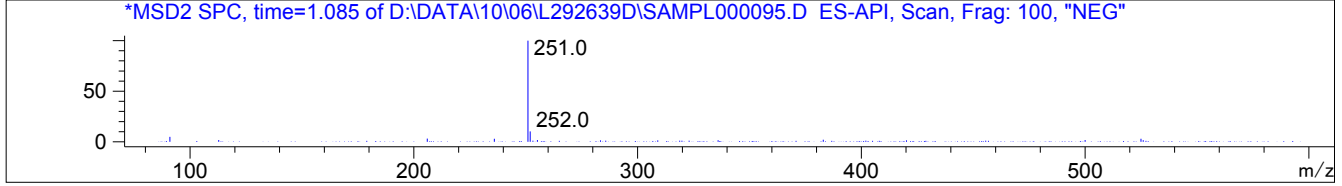



SVK-25  
SVK 25  
1H

7.53  
7.52  
7.30  
7.26  
7.26  
7.25  
7.25  
7.25  
7.07

A (d) 7.69  
B (dd) 7.53  
C (s) 7.30  
D (dt) 7.26  
E (s) 7.07

F (s) 5.79

G (s) 3.86  
H (s) 3.74

I (s) 2.86  
J (s) 2.58

# Compound 15

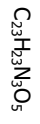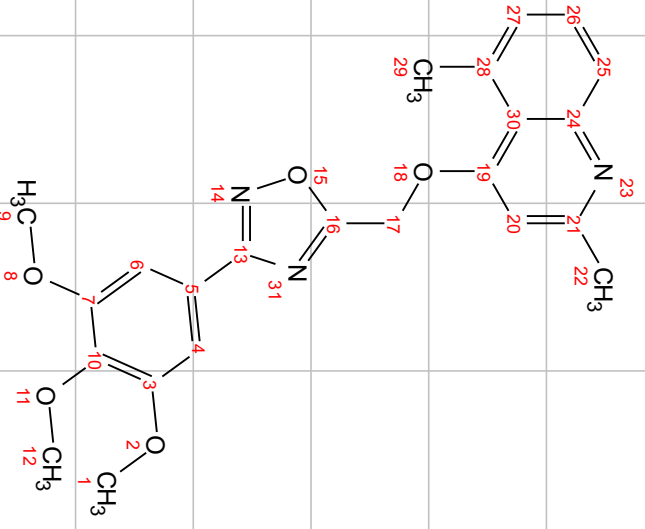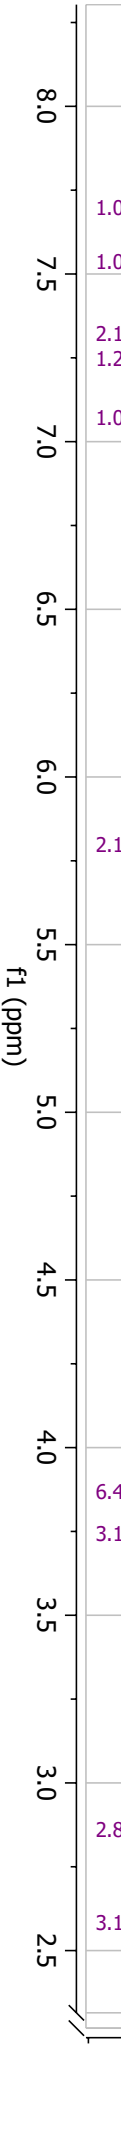

# Compound 16

Sample H2672083

0.1%FA-ACN 5-95%ACN 6 min. Zorbax-Eclipse-Plus C18 4,6 x 100mm, 3.5  $\mu$ m.

| # | Time  | Area%  |
|---|-------|--------|
| 1 | 5.827 | 100.00 |

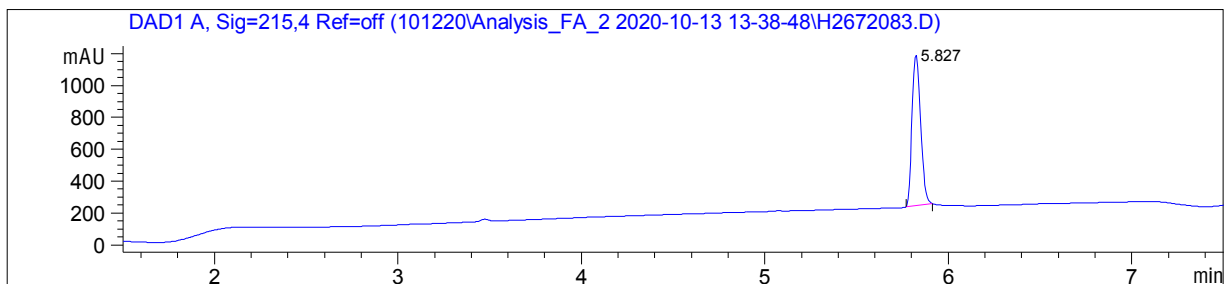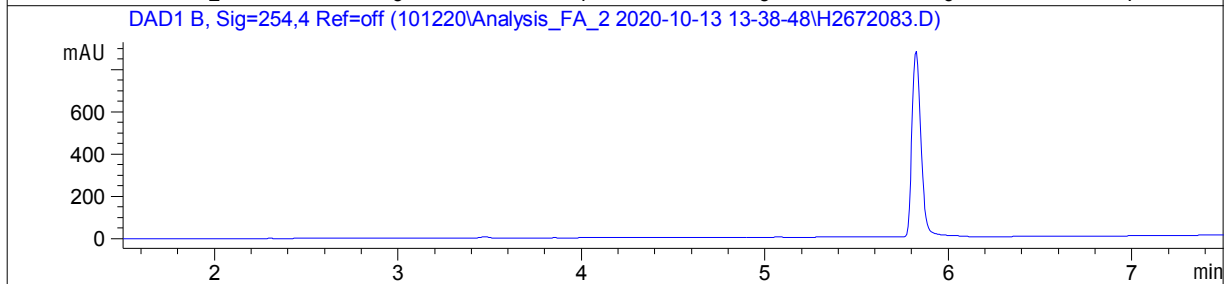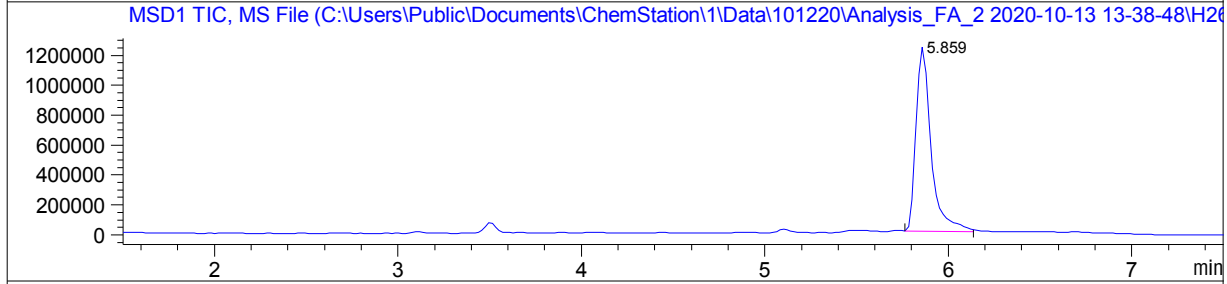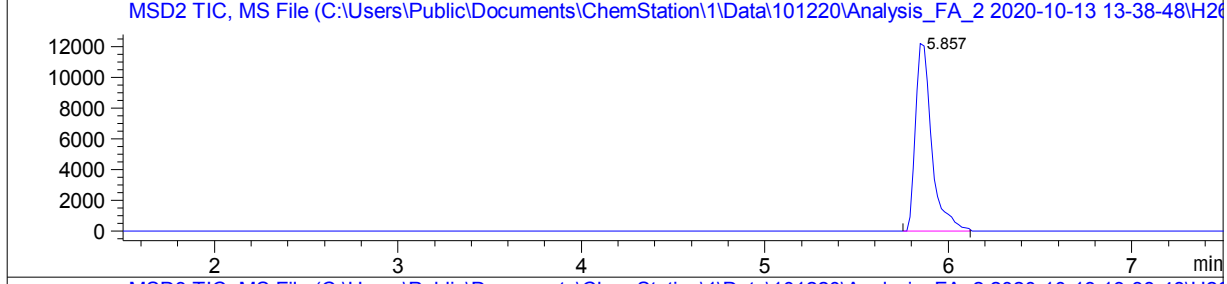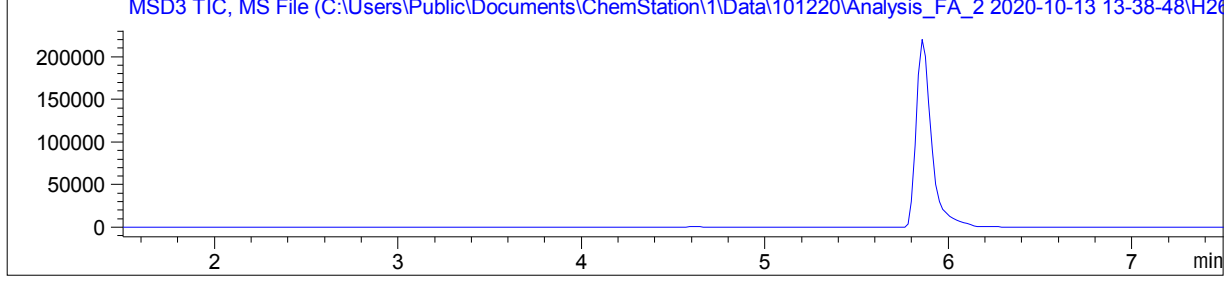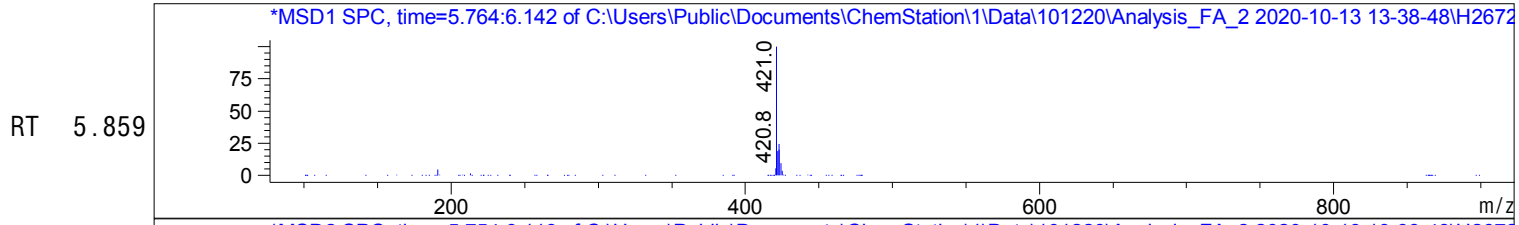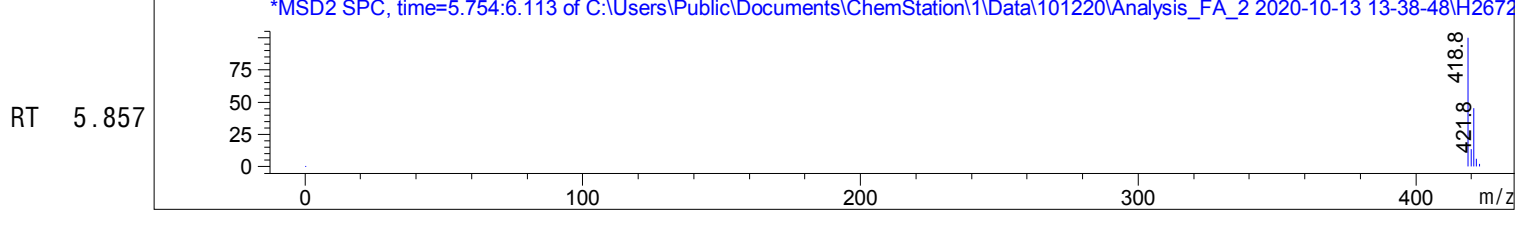

H2672083

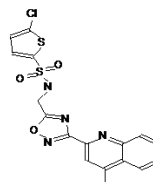

H2672083 C17H13ClN4O3S2 428.99

# Compound 16

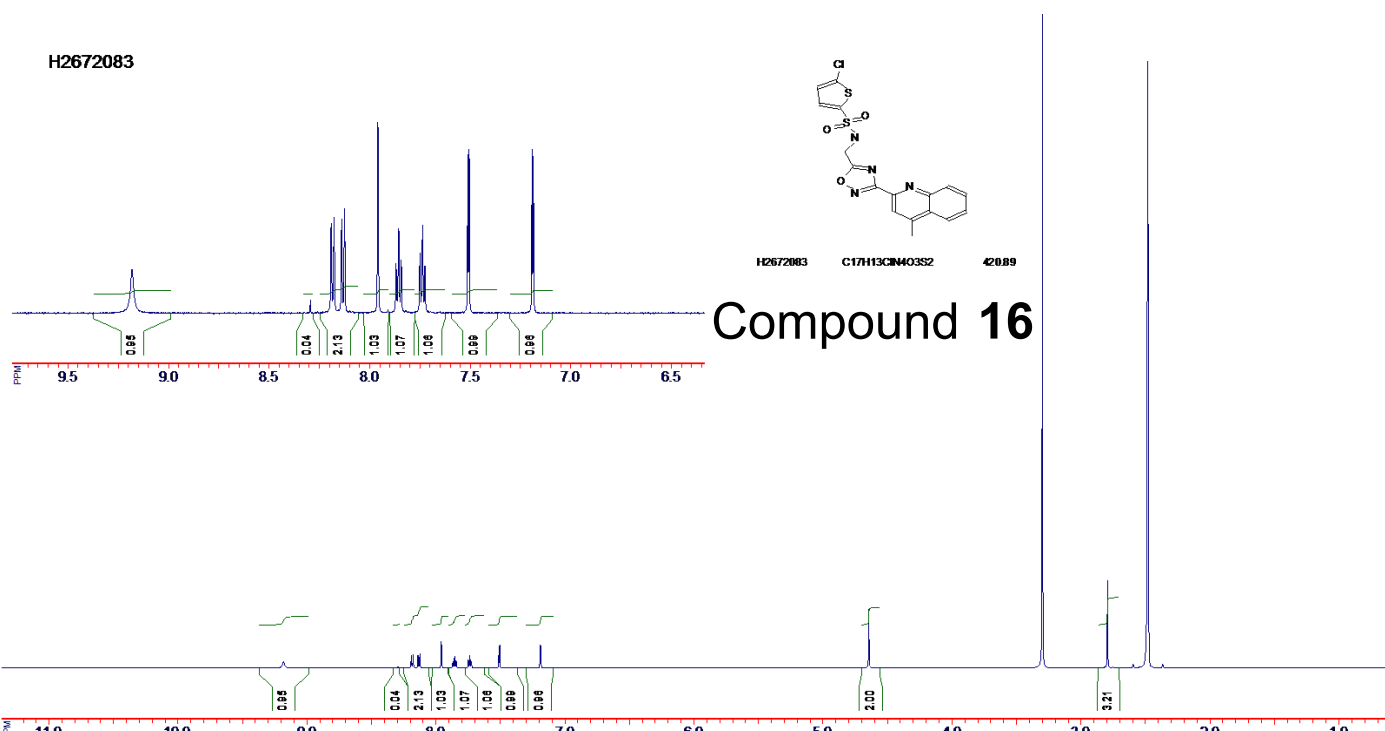

|                     |                |                  |           |                            |           |
|---------------------|----------------|------------------|-----------|----------------------------|-----------|
| File name: H2672083 | Host: H2672083 | SF: 599.7811 MHz | NSC: 0    | PW: 4.40 usec, RG: 44      | SE 131072 |
| Date: 26-Nov-2020   | Solvent: dmsd  | SW: 11364 Hz     | TE: 298 K | AQ: 2.82 sec, RD: 0.00 sec | H2672083  |

# Compound 17

Sample  
H2665601

0.1%FA-ACN 5-95%ACN 6 min. Zorbax-Eclipse-Plus C18 4,6 x  
100mm, 3.5 mkm.

| # | Time  | Area% |
|---|-------|-------|
| 1 | 2.394 | 1.75  |
| 2 | 6.730 | 98.25 |

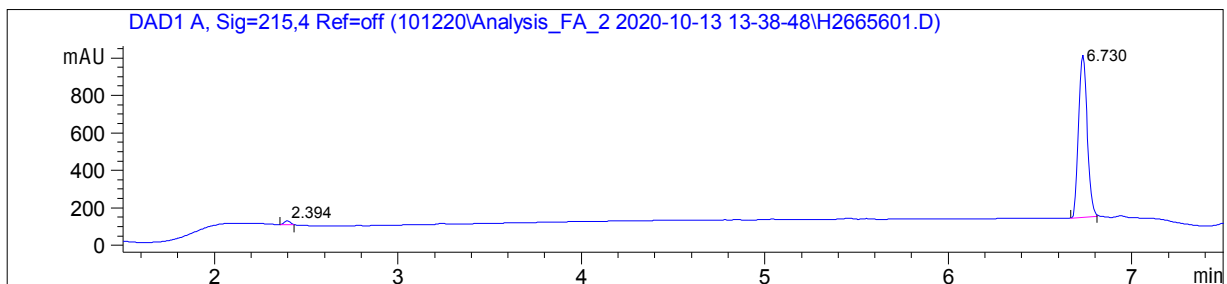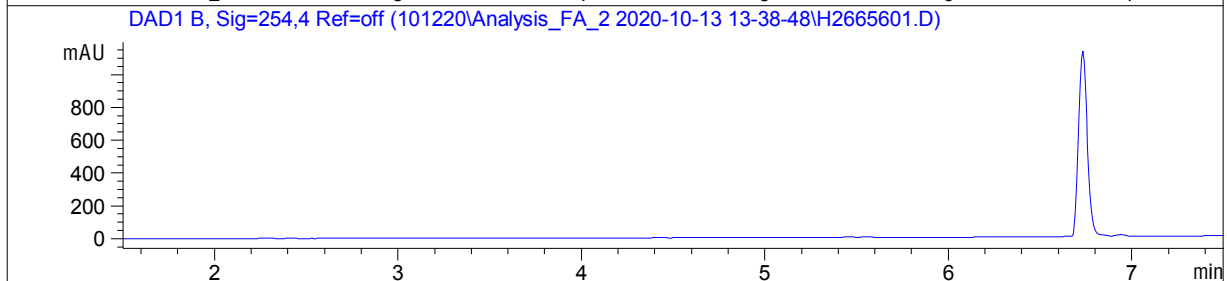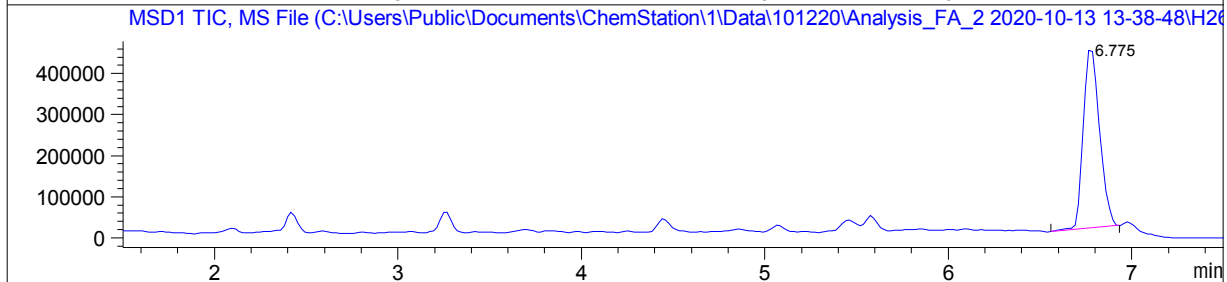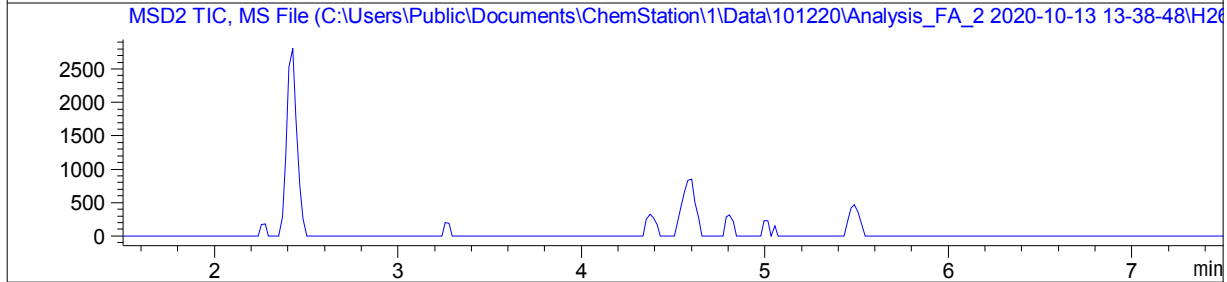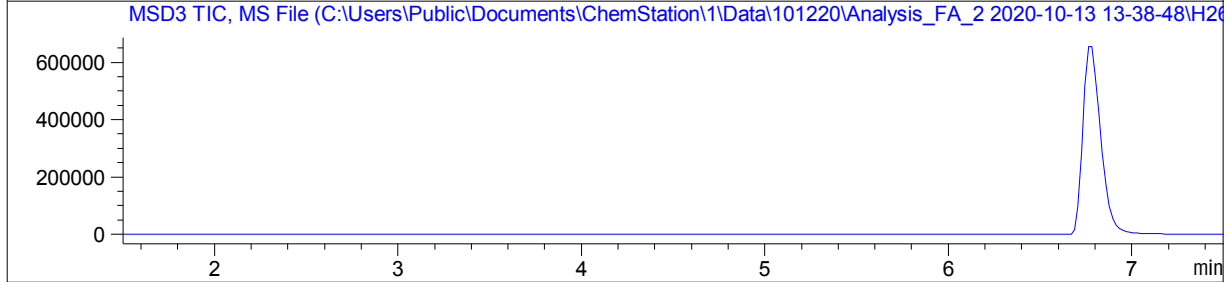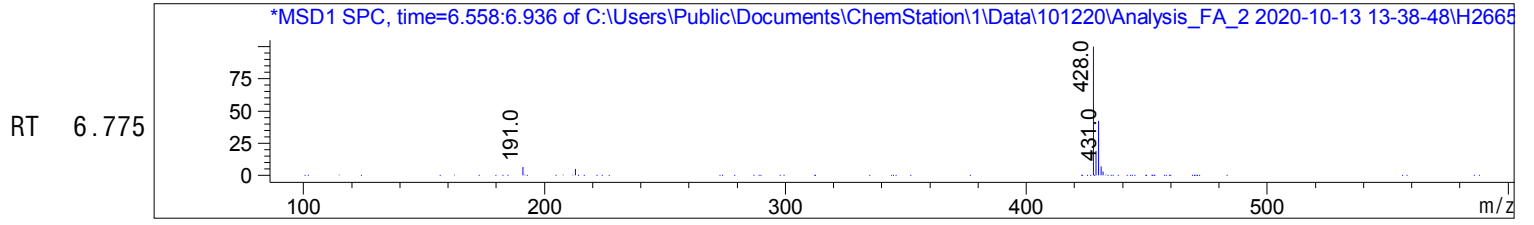

H2665601

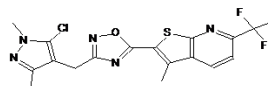

H2665601 C17H13ClF3N5OS 427.83

# Compound 17

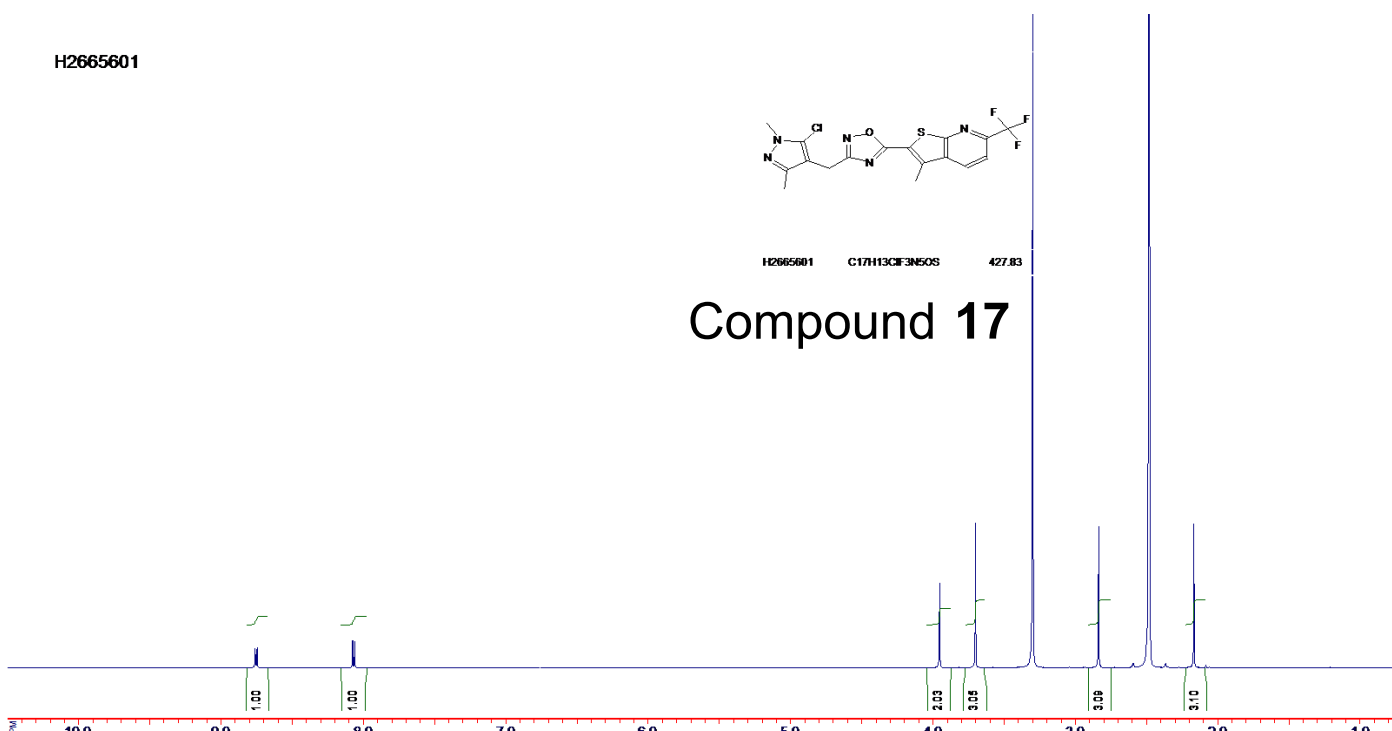

|                     |               |                  |           |                            |                 |
|---------------------|---------------|------------------|-----------|----------------------------|-----------------|
| File name: H2665601 | Host: char    | SF: 599.7811 MHz | NSC: 0    | PW: 4.40 usec, RG: 44      | SE 131072       |
| Date: 26-Nov-2020   | Solvent: dmsd | SW: 11364 Hz     | TE: 298 K | AQ: 2.82 sec, RD: 0.00 sec | <b>H2665601</b> |

# Compound 18

Sample H2660982

0.1%FA-ACN 5-95%ACN 6 min. Zorbax-Eclipse-Plus C18 4,6 x 100mm, 3.5 mkm.

| # | Time  | Area%  |
|---|-------|--------|
| 1 | 6.442 | 100.00 |

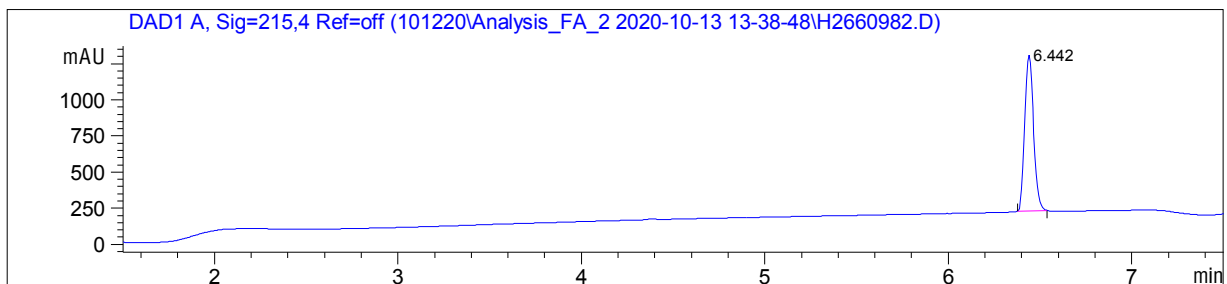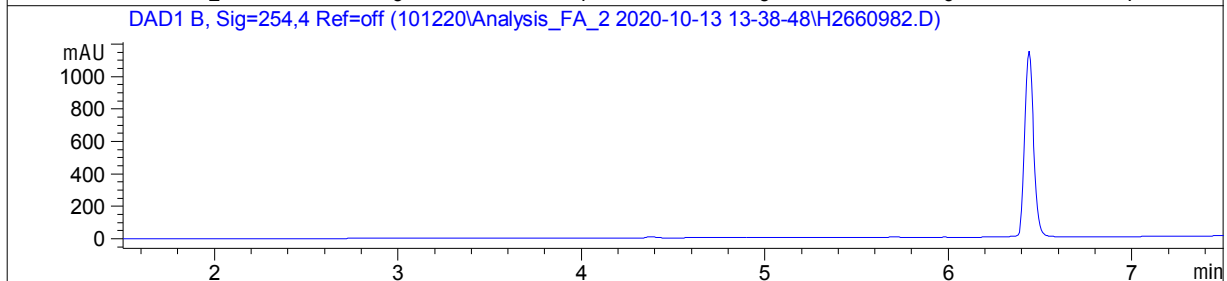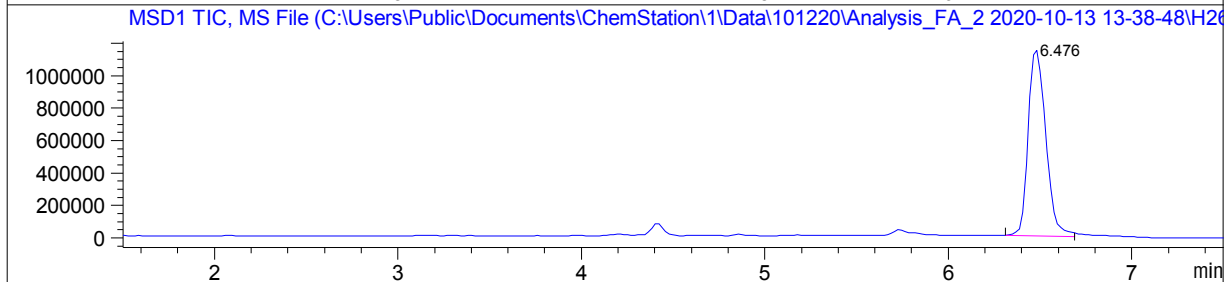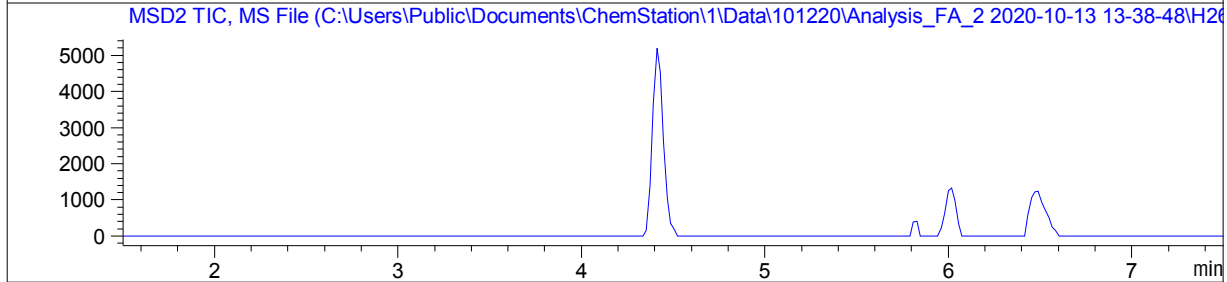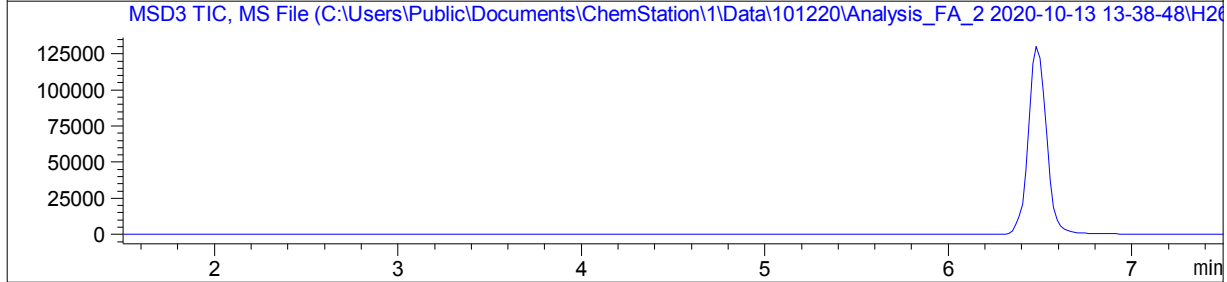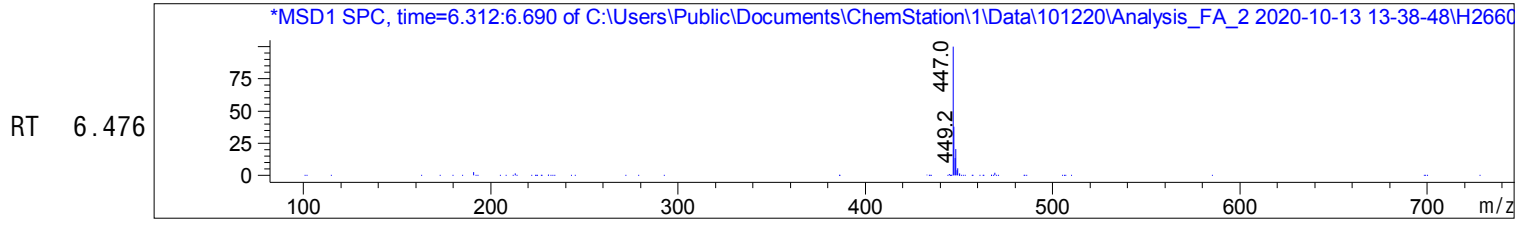

H2660982

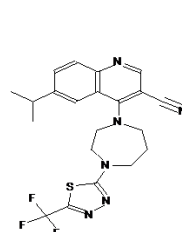

H2660982 C21H21F3N6S 446.49

# Compound 18

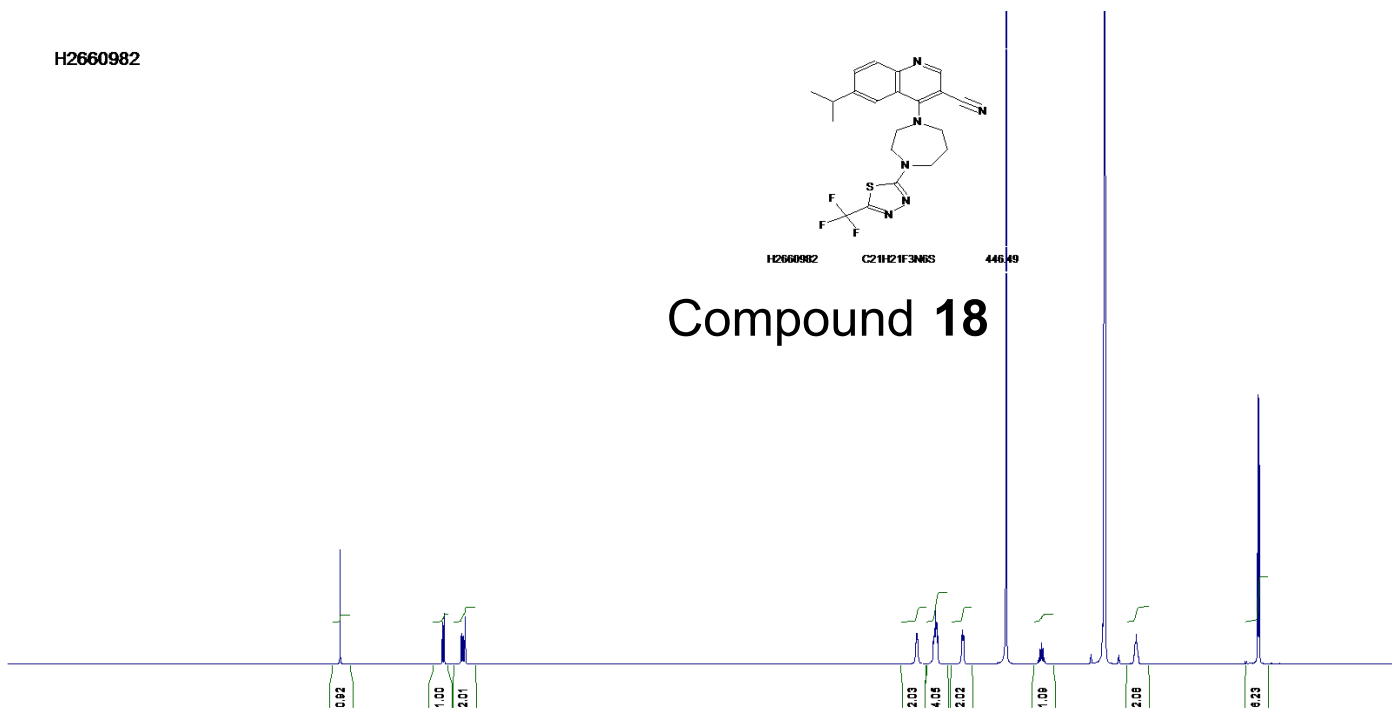

|                     |                |                  |           |                            |           |
|---------------------|----------------|------------------|-----------|----------------------------|-----------|
| File name: H2660982 | Host: H2660982 | SF: 599.7811 MHz | NSC: 0    | PW: 4.40 usec, RG: 44      | SE 131072 |
| Date: 26-Nov-2020   | Solvent: dmsd  | SW: 11364 Hz     | TE: 298 K | AQ: 2.82 sec, RD: 0.00 sec | H2660982  |

# Compound 19

Sample H2666177

0.1%FA-ACN 5-95%ACN 6 min. Zorbax-Eclipse-Plus C18 4,6 x 100mm, 3.5 mkm.

| # | Time  | Area% |
|---|-------|-------|
| 1 | 4.378 | 0.28  |
| 2 | 5.416 | 99.72 |

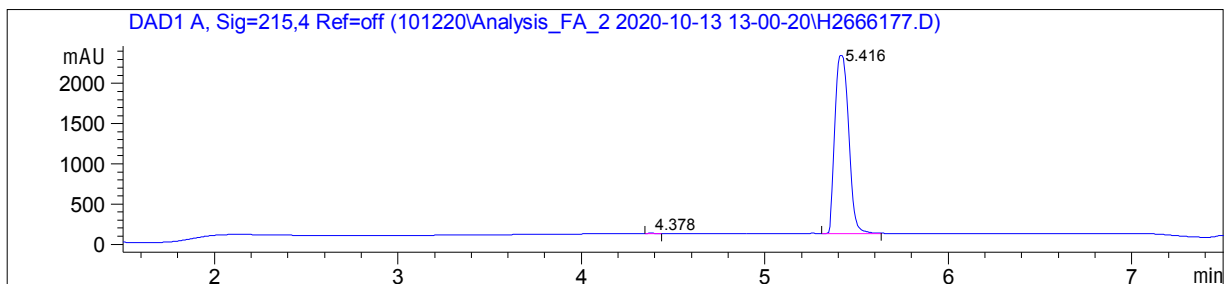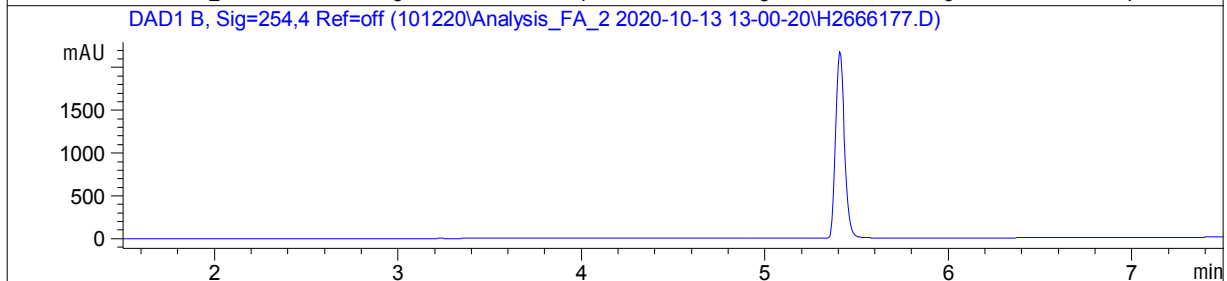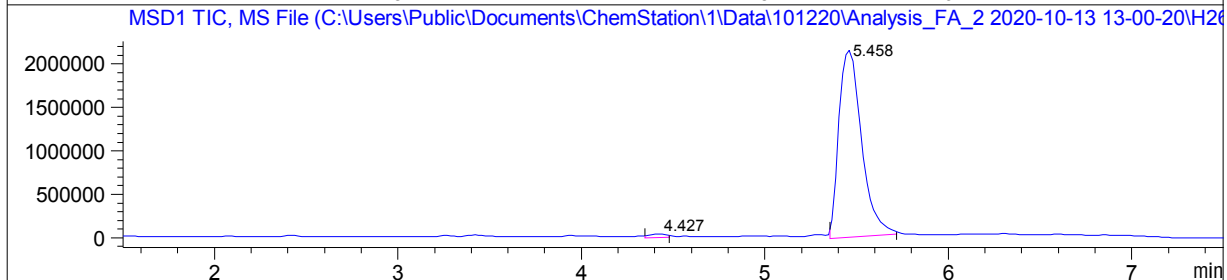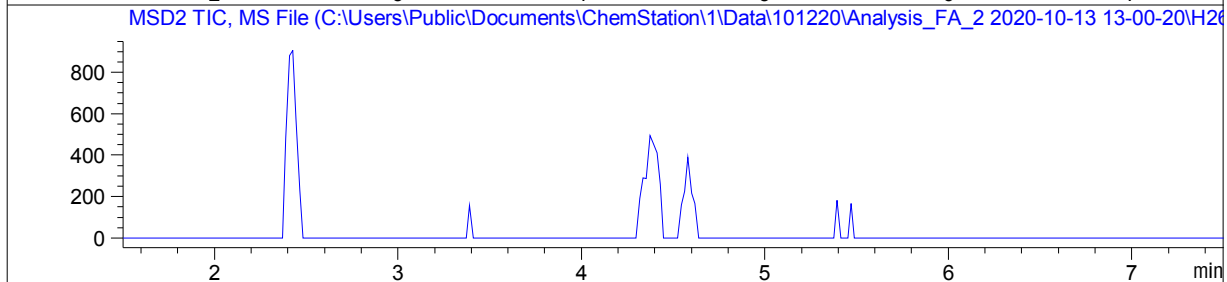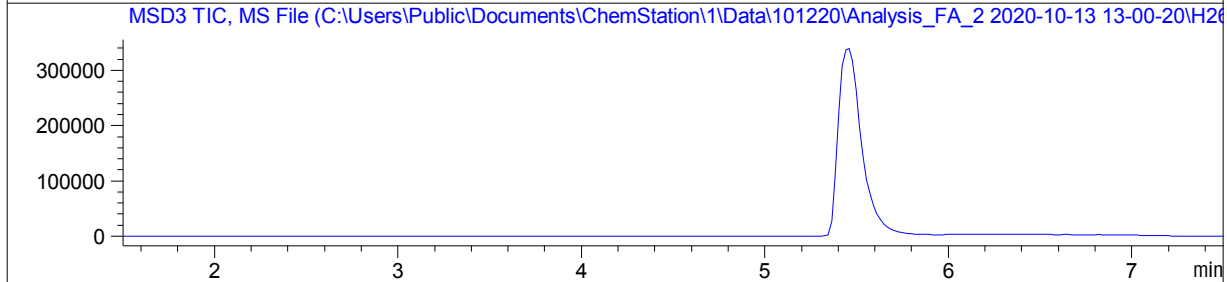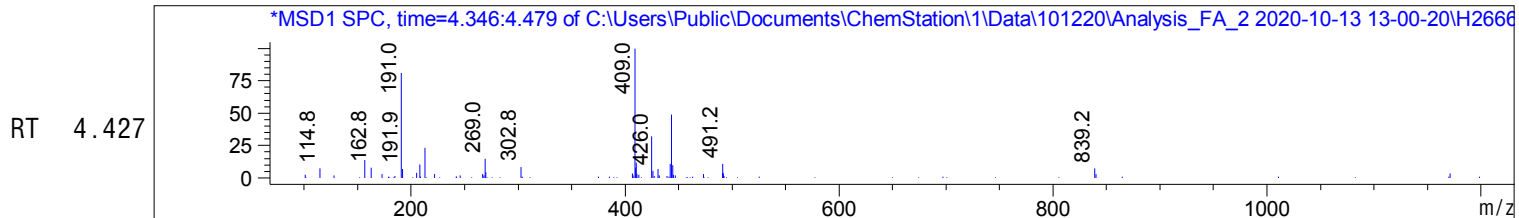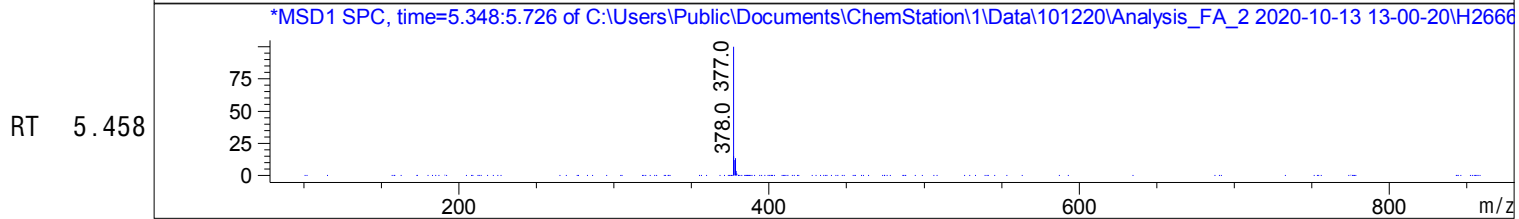



H2666177

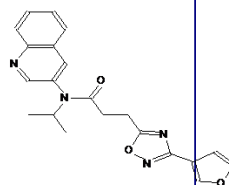

H2666177 C21H20N4O3 376.41

# Compound 19

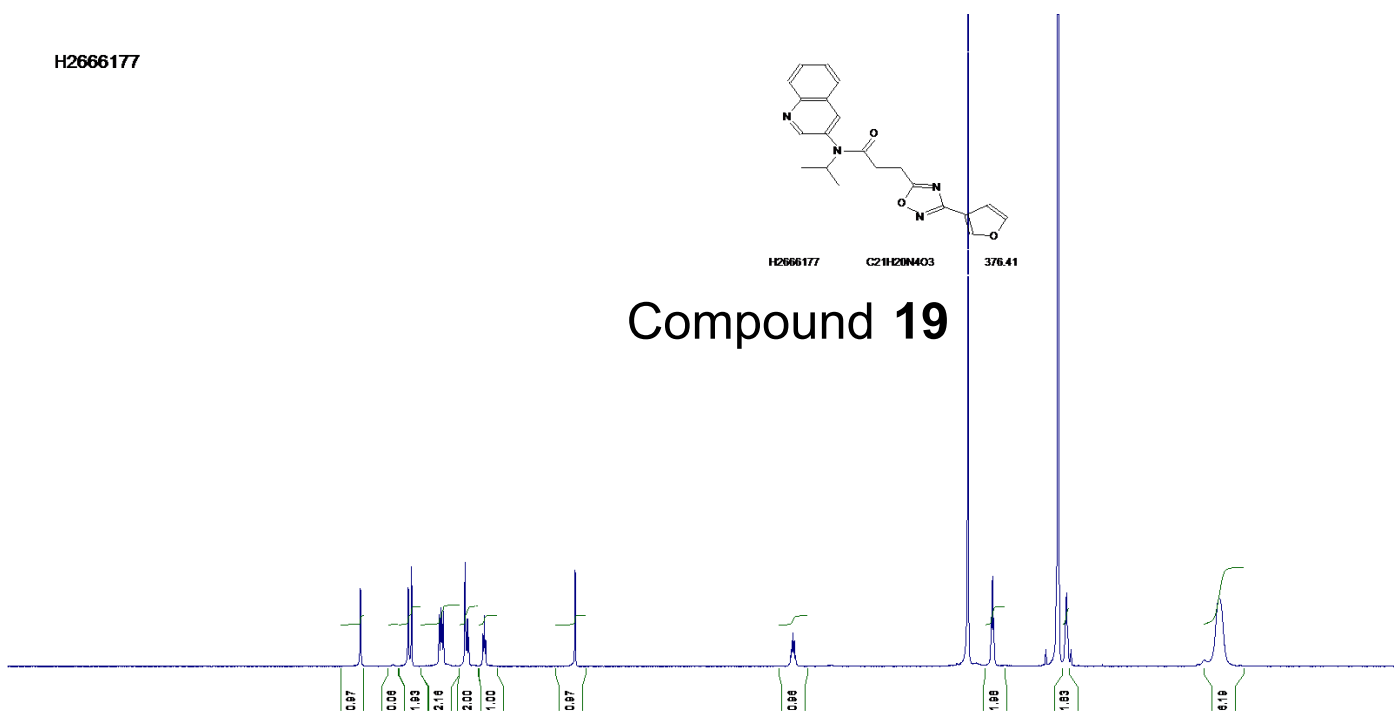

|                     |                |                  |           |                            |           |
|---------------------|----------------|------------------|-----------|----------------------------|-----------|
| File name: H2666177 | Host: H2666177 | SF: 599.7811 MHz | NSC: 0    | PW: 4.40 usec, RG: 44      | SE 131072 |
| Date: 26-Nov-2020   | Solvent: dmsd  | SW: 11364 Hz     | TE: 298 K | AQ: 2.82 sec, RD: 0.00 sec | H2666177  |

# Compound 20

## S089986\$3

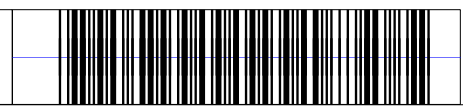

MaxPeak: 100.00%  
Ret\_Time: 1.248 min

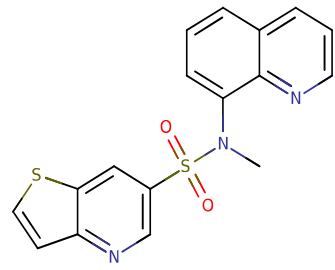

Mol Wt 355.43  
Exact Mass 355.05

| # | Time  | Area%  |
|---|-------|--------|
| 1 | 1.248 | 100.00 |

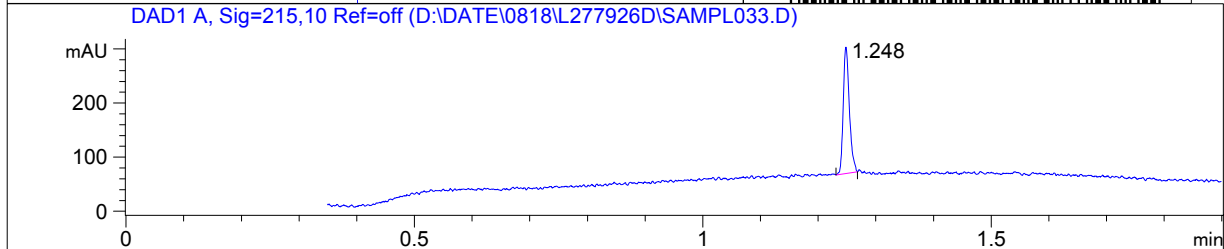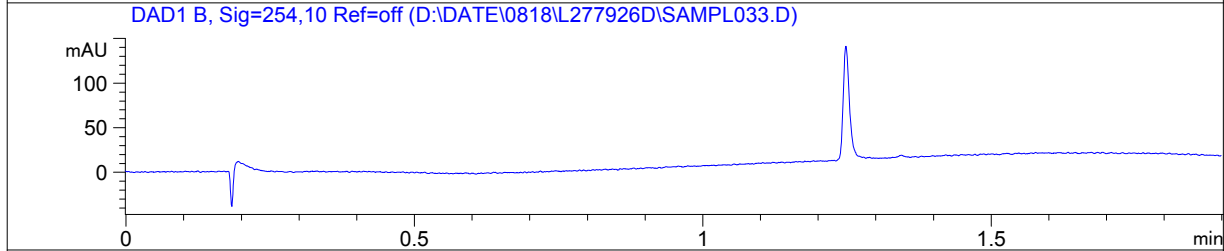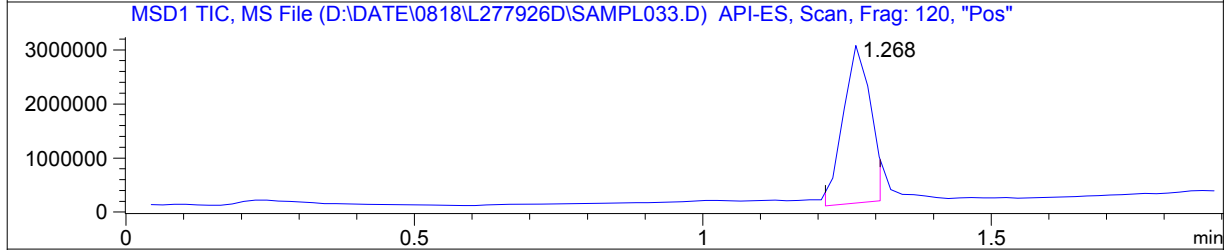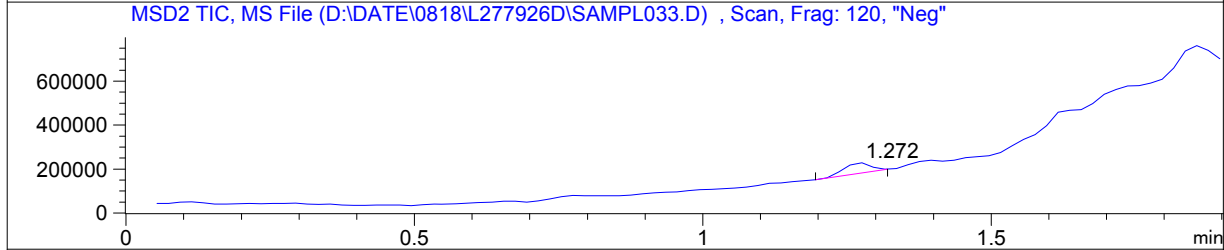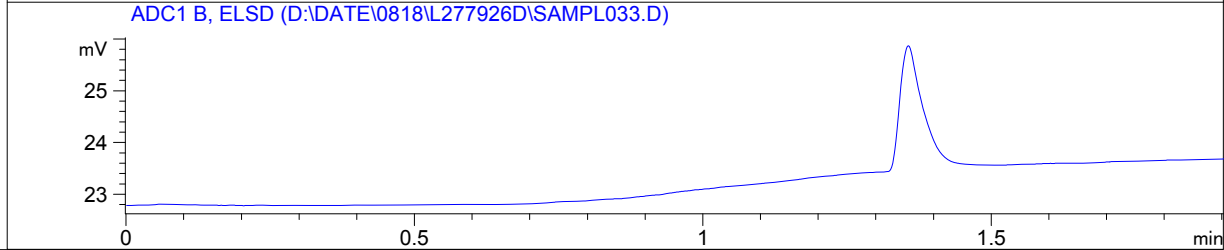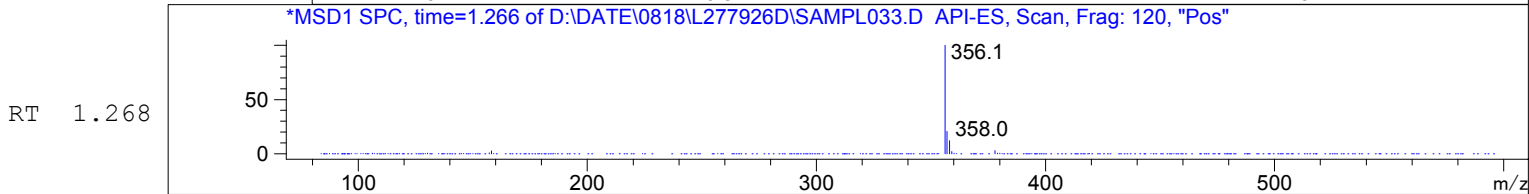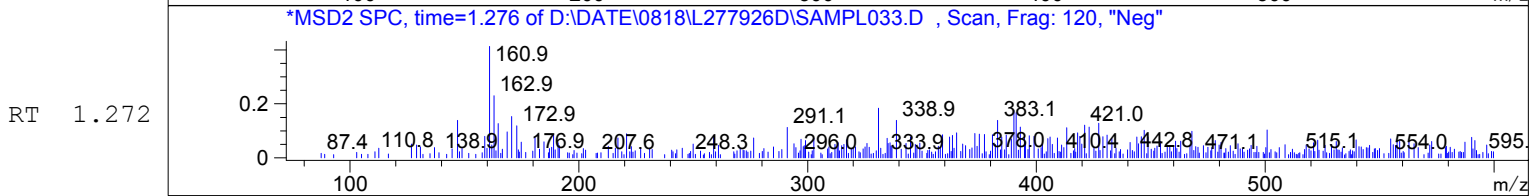

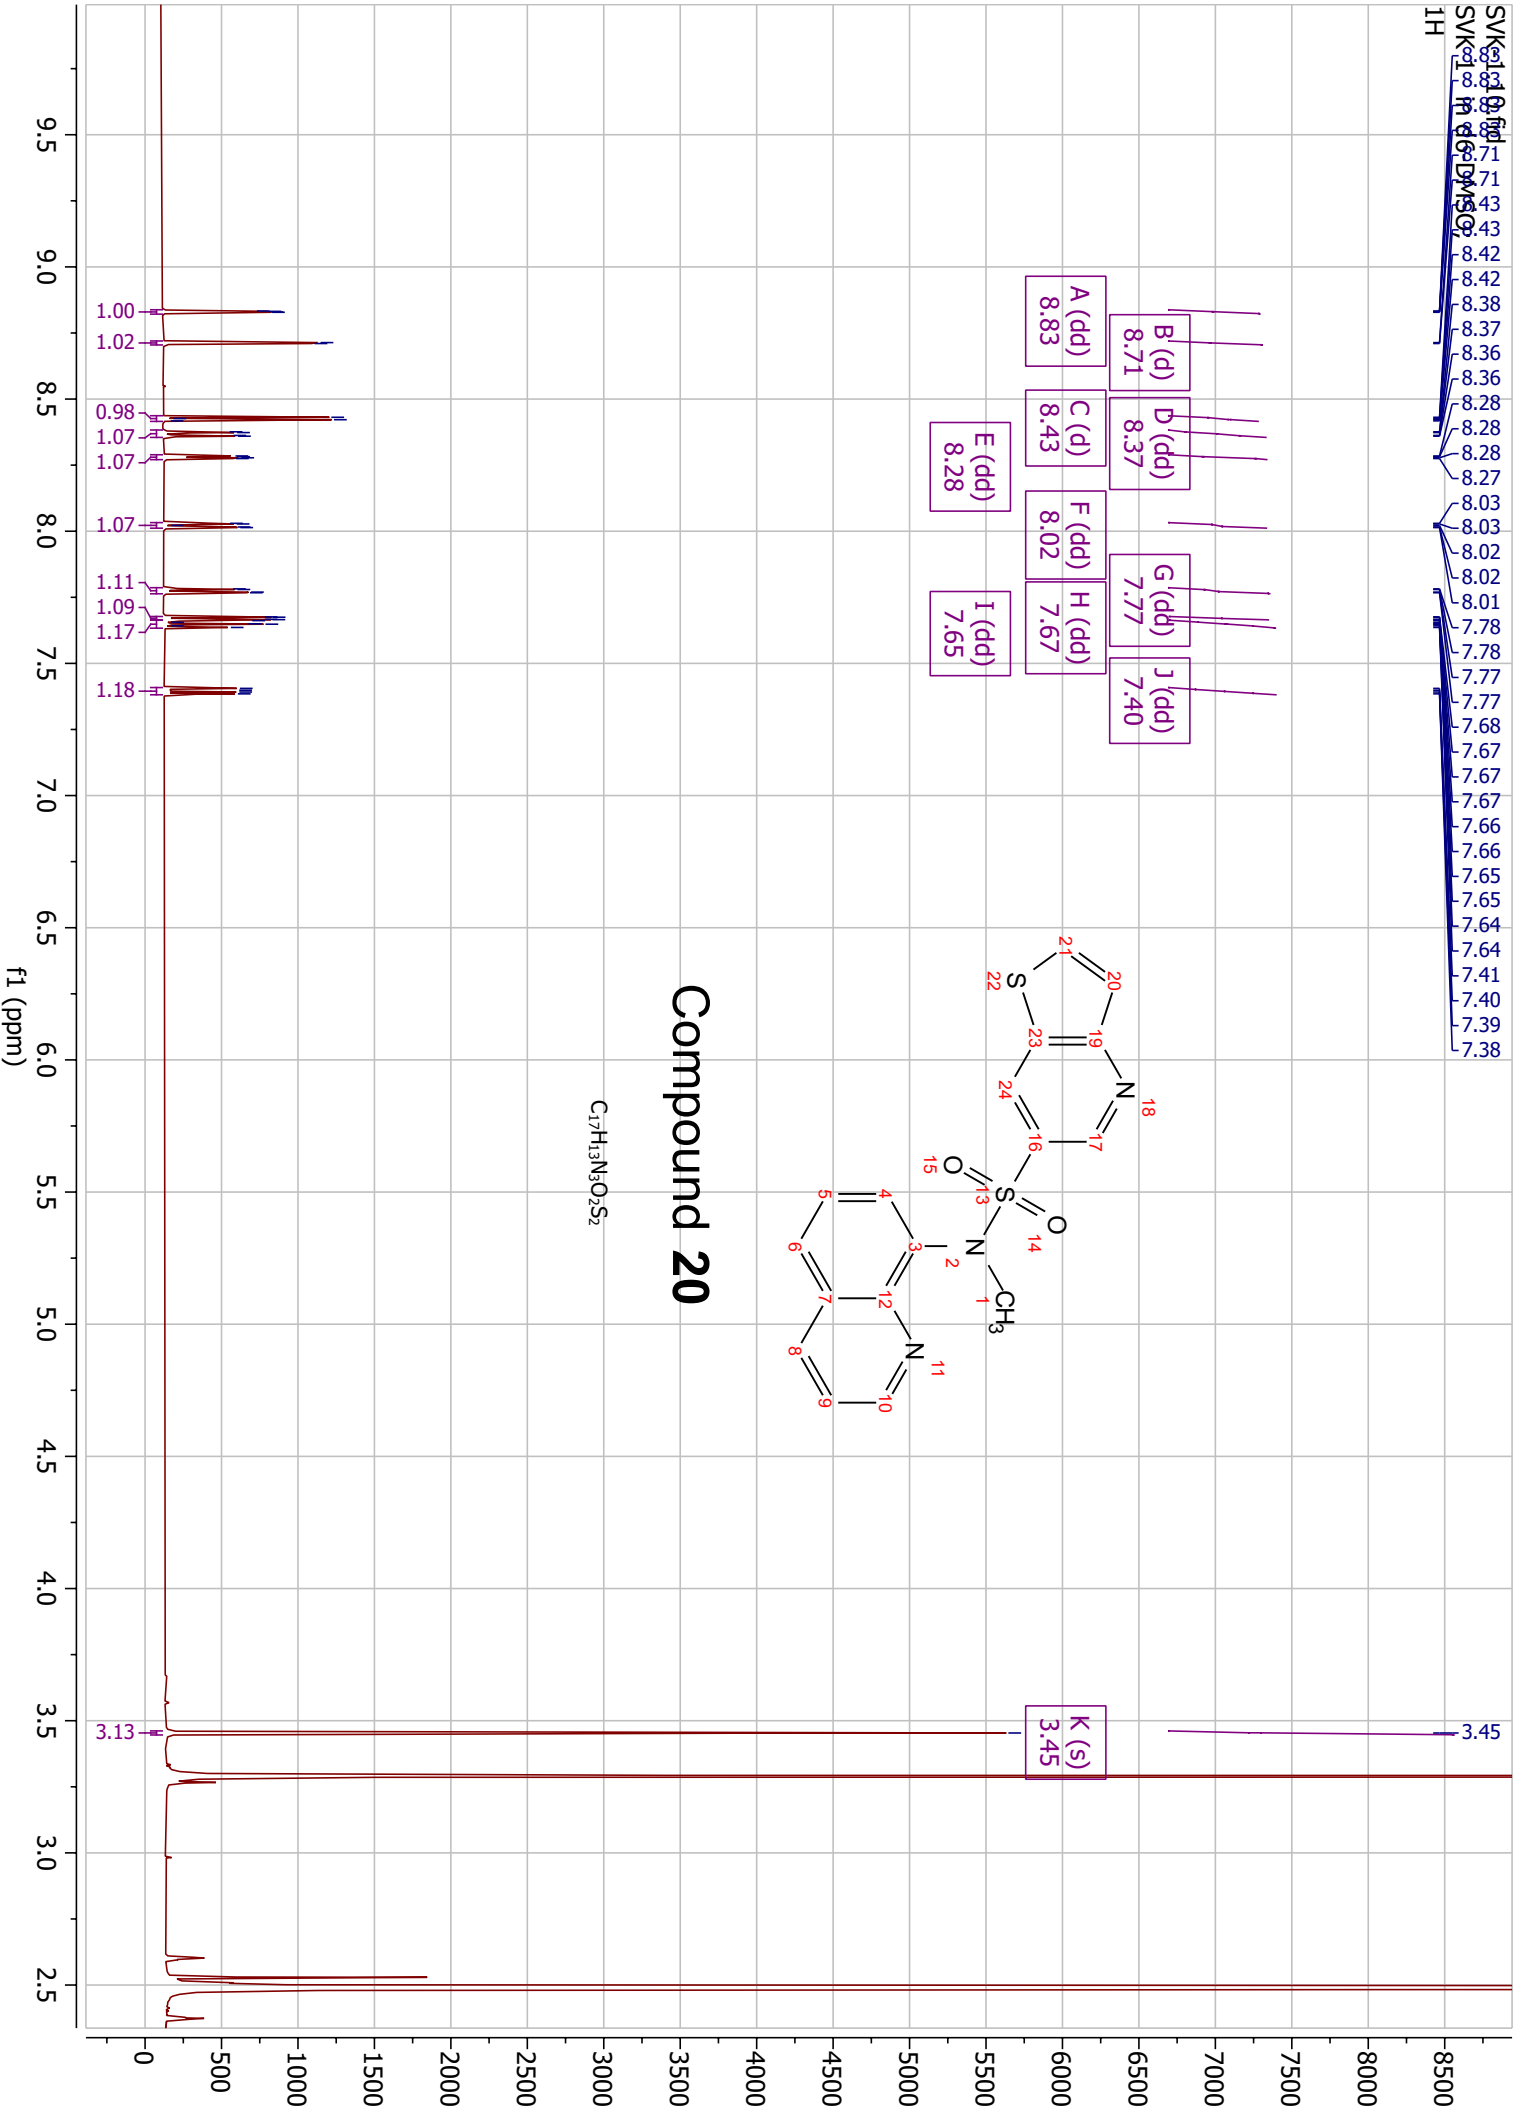

# Compound 21

MaxPeak: 98.57%  
Ret\_Time: 1.513 min

## S089944\$22

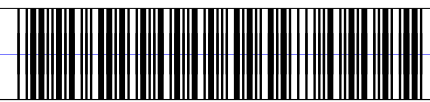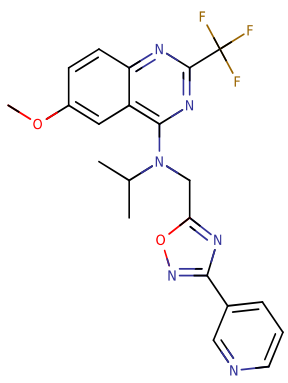

**Mol Wt** 444.41  
**Exact Mass** 444.17

| # | Time  | Area% |
|---|-------|-------|
| 1 | 1.475 | 1.43  |
| 2 | 1.513 | 98.57 |

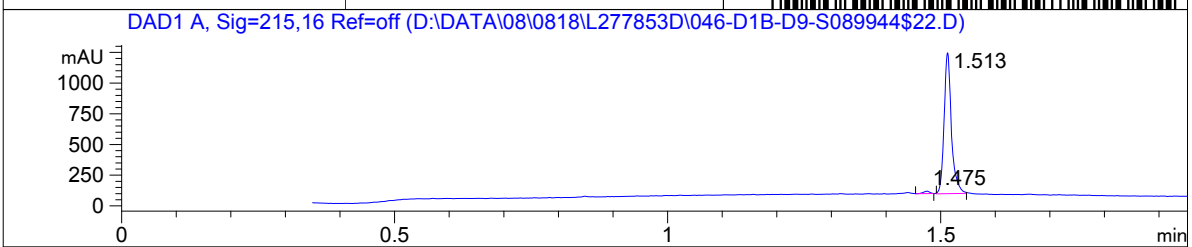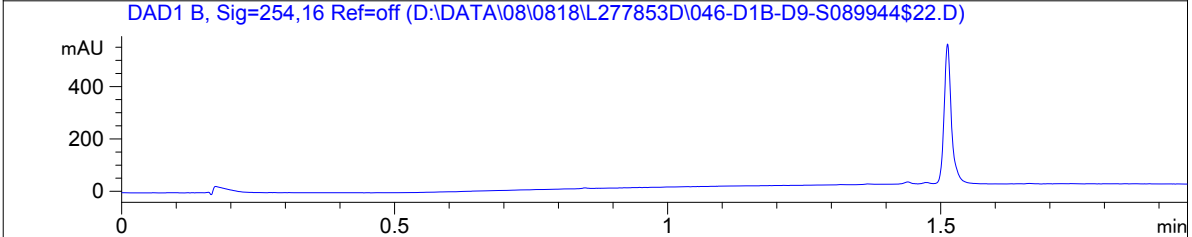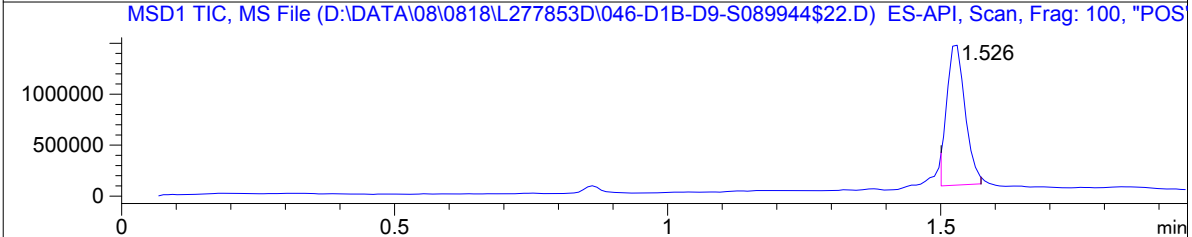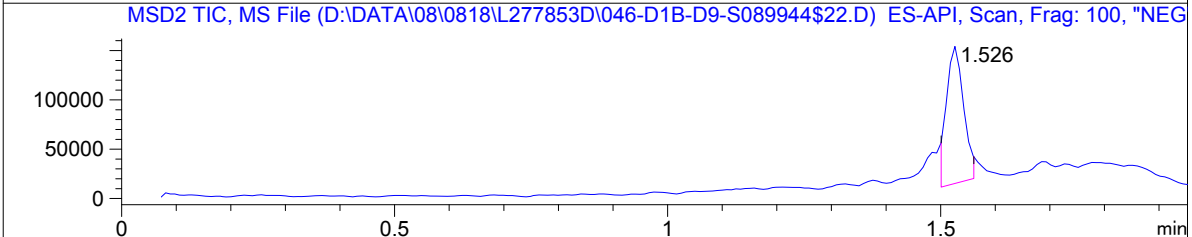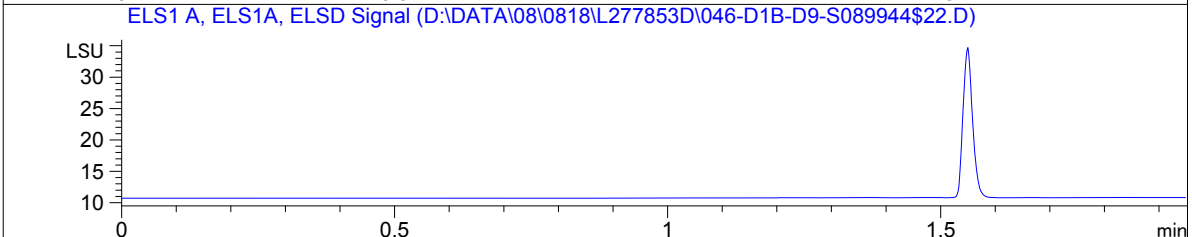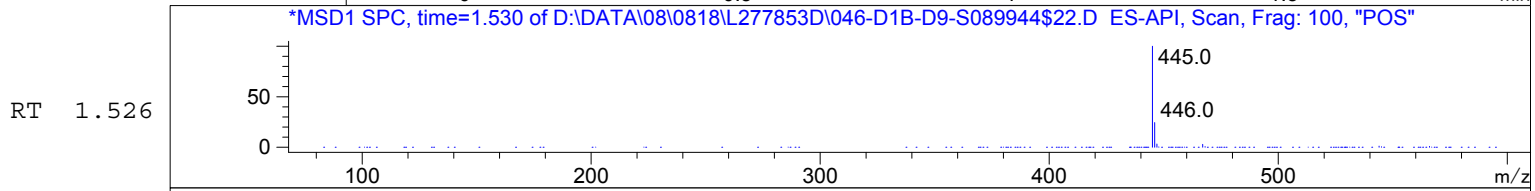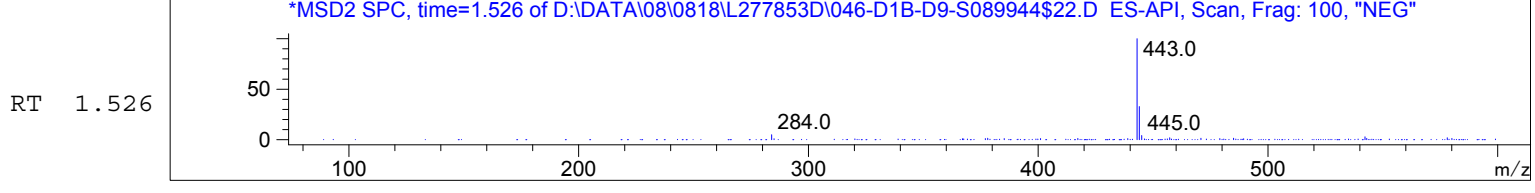

H2565658

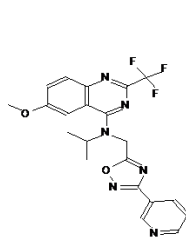

H2565658 C21H19F3N6O2 444.42

# Compound 21

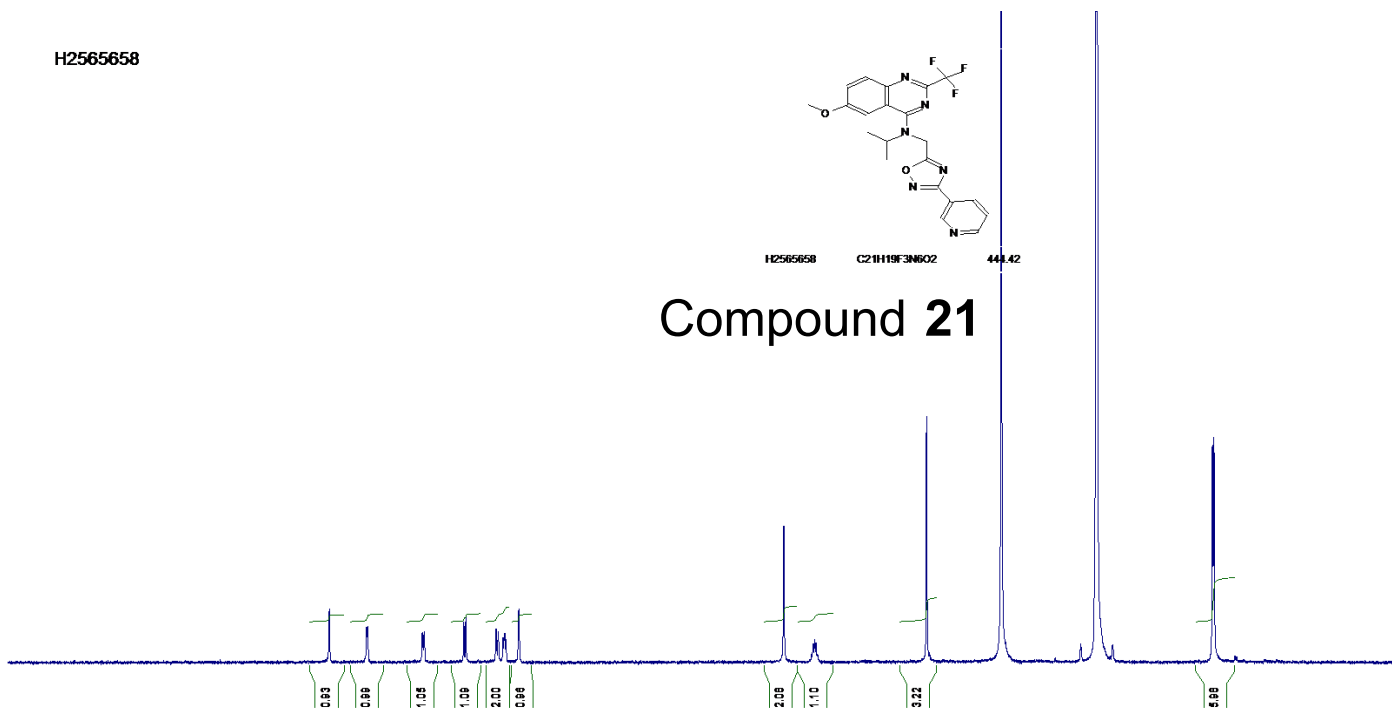

|                     |                |                  |           |                            |            |
|---------------------|----------------|------------------|-----------|----------------------------|------------|
| File name: H2565658 | Host: H2565658 | SF: 499.8207 MHz | NSC: 0    | PW: 6.60 usec, RG: 40      | SE: 131072 |
| Date: 01-Dec-2020   | Solvent: dms0  | SW: 11364 Hz     | TE: 298 K | AQ: 2.82 sec, RD: 0.00 sec | H2565658   |

# Compound 22

MaxPeak: 100.00%  
Ret\_Time: 1.110 min

## S089988\$5

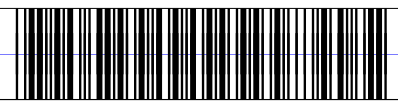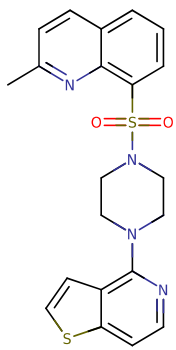

Mol Wt 424.54

Exact Mass 424.12

| # | Time  | Area%  |
|---|-------|--------|
| 1 | 1.110 | 100.00 |

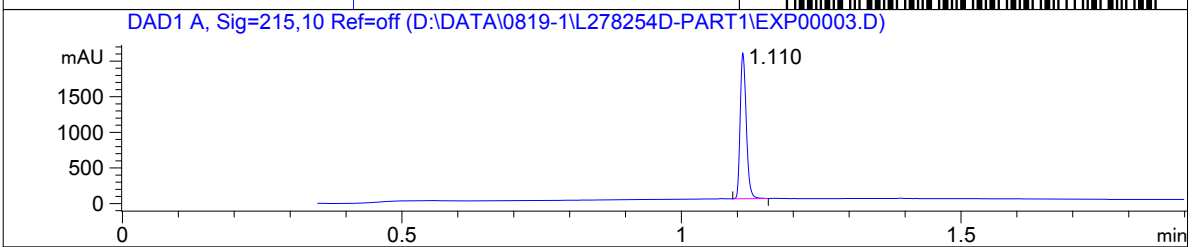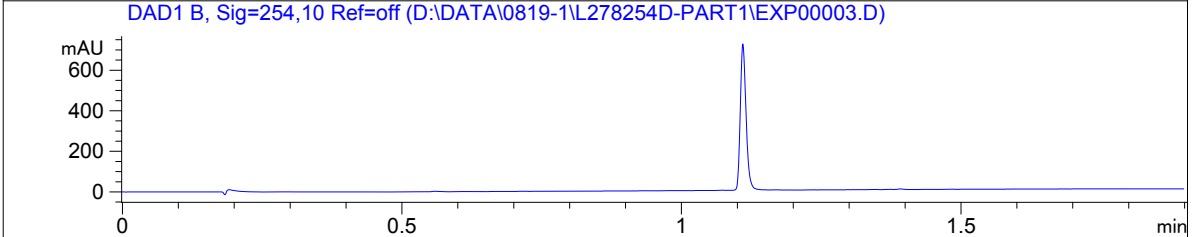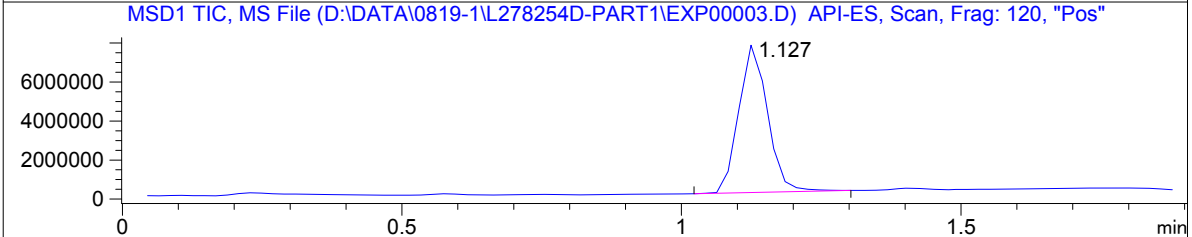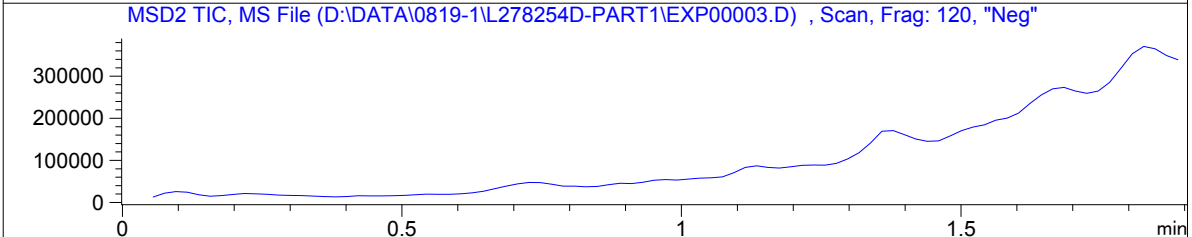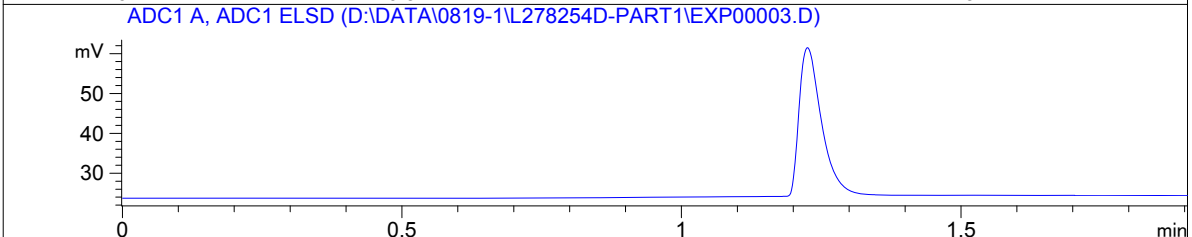

RT 1.127

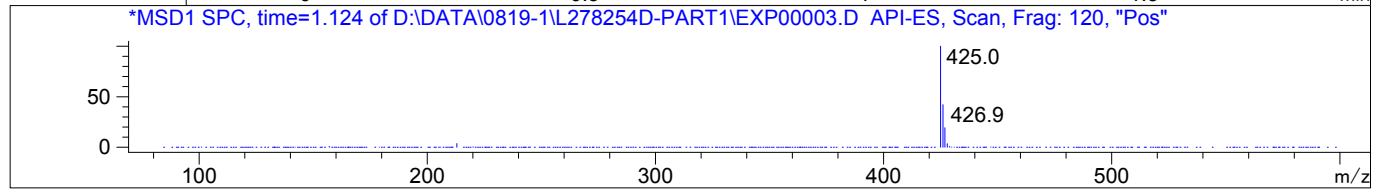

H2562997

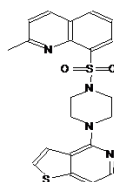

H2562997

C21H20N4O2S2

424.53

# Compound 22

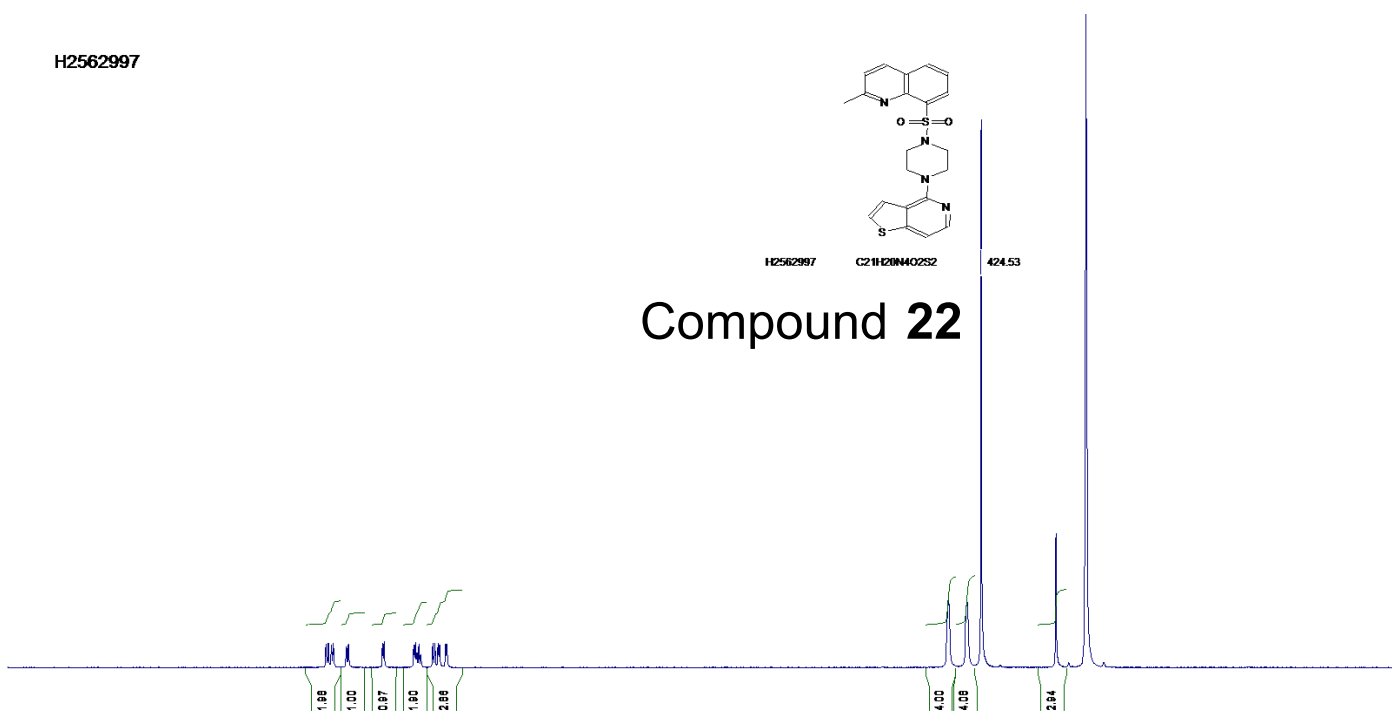

|                     |               |                  |           |                            |            |
|---------------------|---------------|------------------|-----------|----------------------------|------------|
| File name: H2562997 | Host: char    | SF: 499.8207 MHz | NSC: 0    | PW: 6.60 usec, RG: 40      | SE: 131072 |
| Date: 01-Dec-2020   | Solvent: dmso | SW: 11364 Hz     | TE: 298 K | AQ: 2.82 sec, RD: 0.00 sec | H2562997   |

# Compound 23

Sample 0.1%FA-ACN 5-95%ACN 6 min. Zorbax-Eclipse-Plus C18 4,6 x  
H2660127 100mm, 3.5 mkm.

| # | Time  | Area% |
|---|-------|-------|
| 1 | 5.391 | 53.36 |
| 2 | 5.443 | 46.64 |

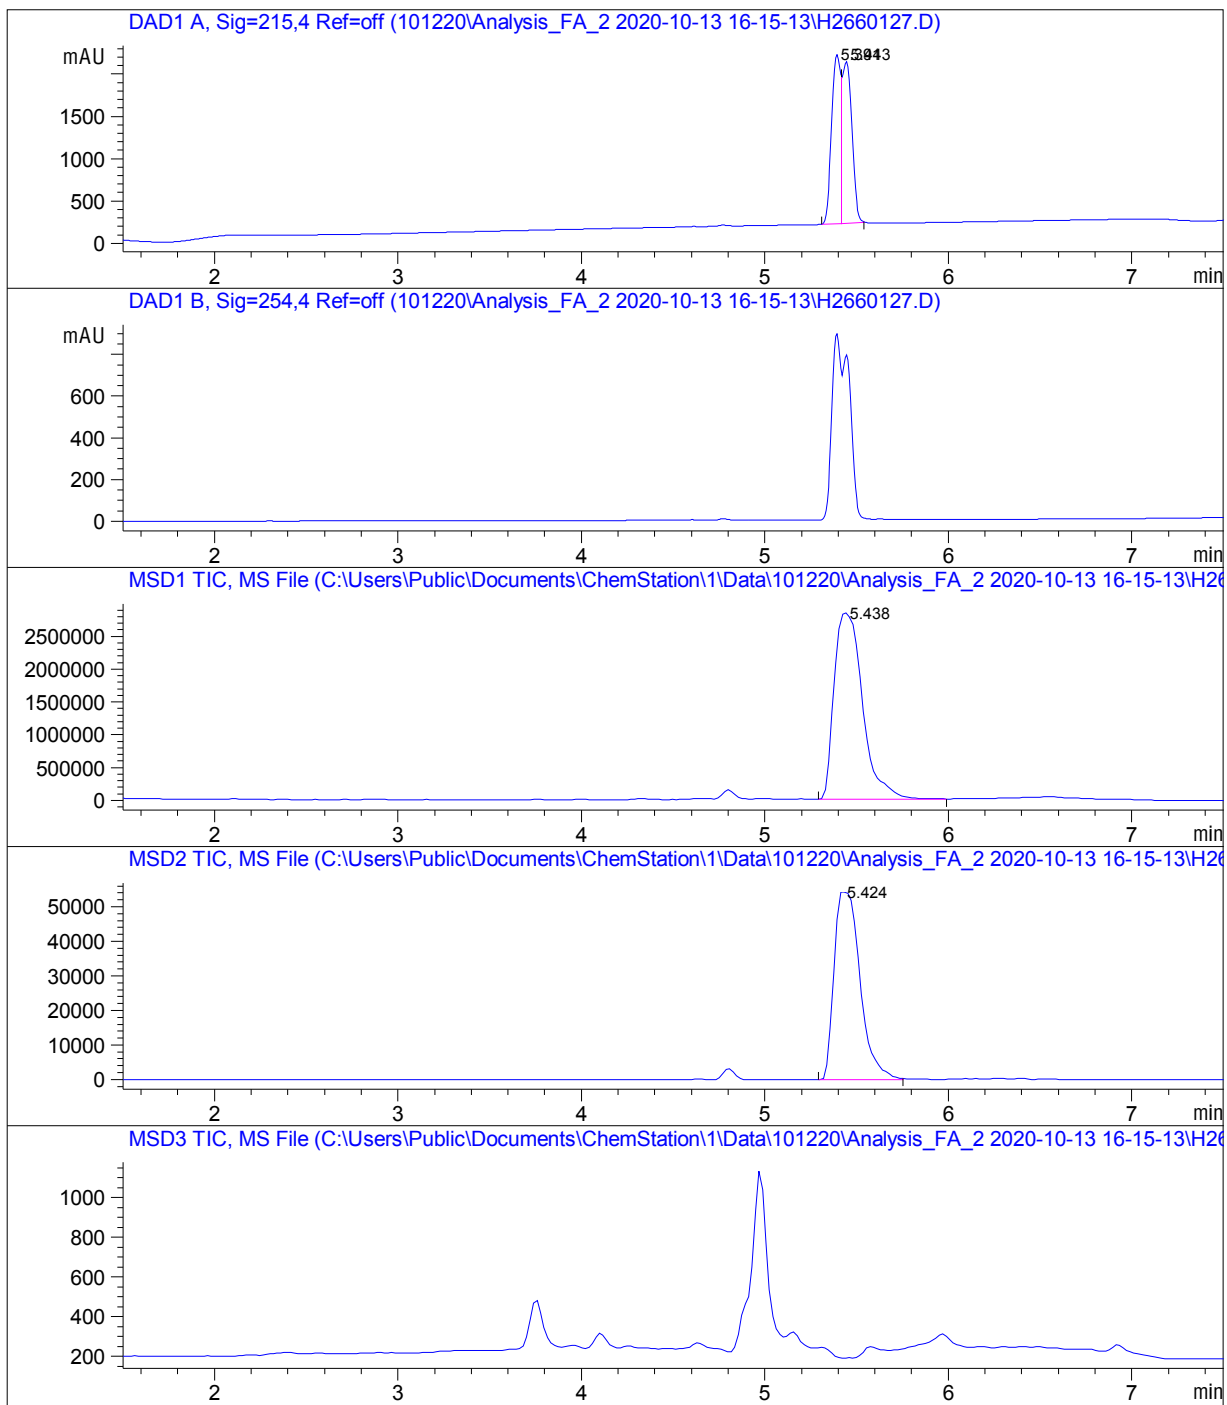

RT 5.438

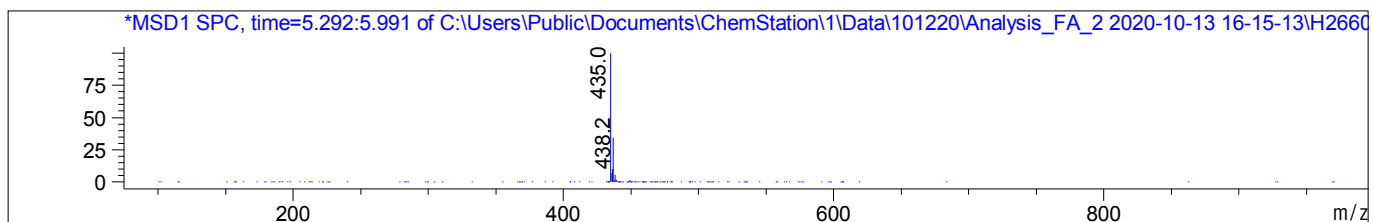

RT 5.424

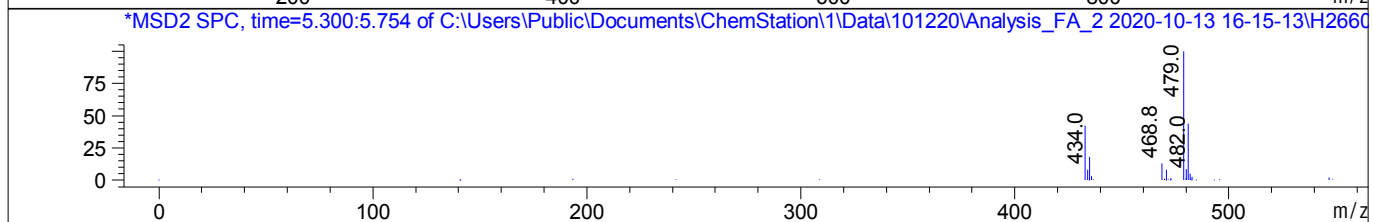



H2660127

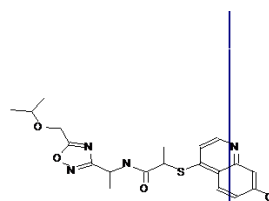

H2660127 C20H23ClN4O3S 434.94

# Compound 23

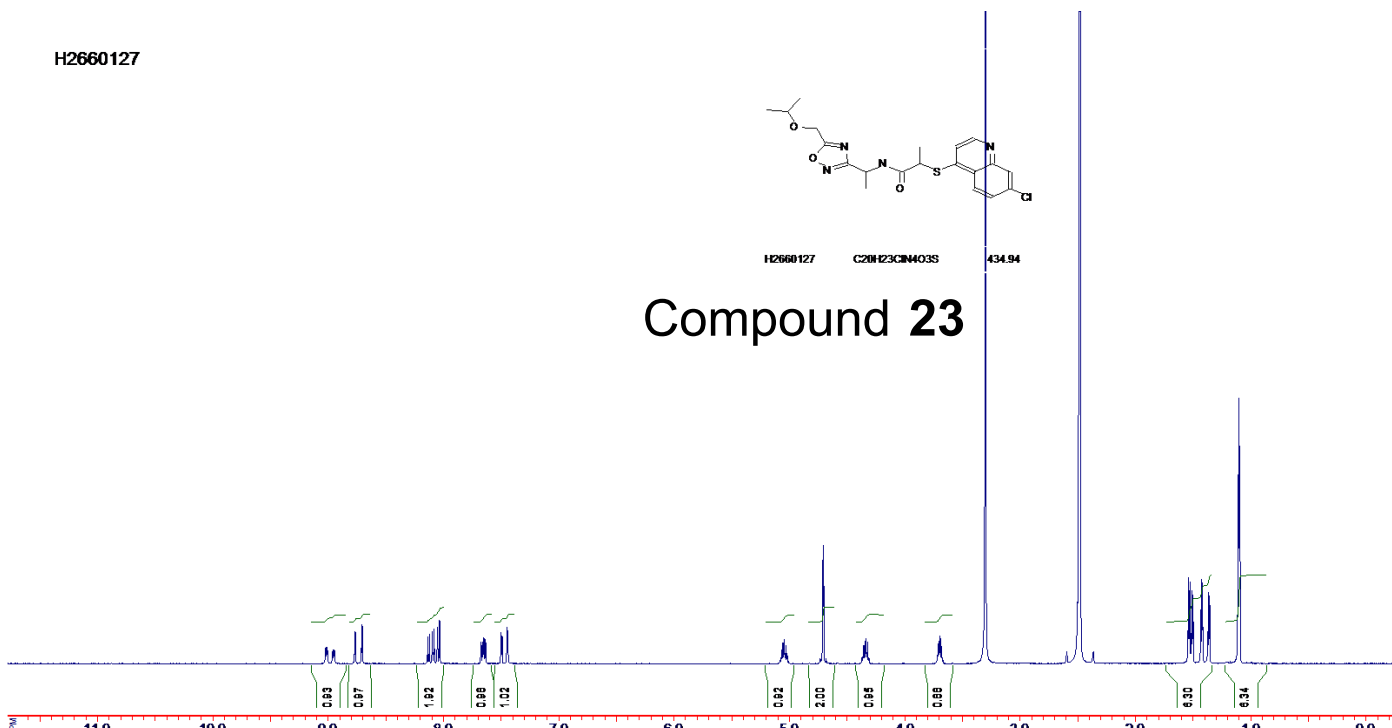

|                     |      |               |     |                  |     |           |     |                            |     |           |     |
|---------------------|------|---------------|-----|------------------|-----|-----------|-----|----------------------------|-----|-----------|-----|
| 11.0                | 10.0 | 9.0           | 8.0 | 7.0              | 6.0 | 5.0       | 4.0 | 3.0                        | 2.0 | 1.0       | 0.0 |
| File name: H2660127 |      | Hochbar       |     | SF: 599.7811 MHz |     | NSC: 0    |     | PW: 4.40 usec, RG: 44      |     | SE 131072 |     |
| Date: 26-Nov-2020   |      | Solvent: dmso |     | SW: 11364 Hz     |     | TE: 298 K |     | AQ: 2.82 sec, RD: 0.00 sec |     | H2660127  |     |

# Compound 24

Sample H2572918

0.1%FA-ACN 5-95% ACN, 15 min. Kinetext C18 4,6 x 150mm, 2.6 u.

| # | Time  | Area% |
|---|-------|-------|
| 1 | 6.489 | 98.38 |
| 2 | 7.207 | 0.45  |
| 3 | 8.529 | 0.70  |
| 4 | 8.772 | 0.27  |
| 5 | 9.330 | 0.20  |

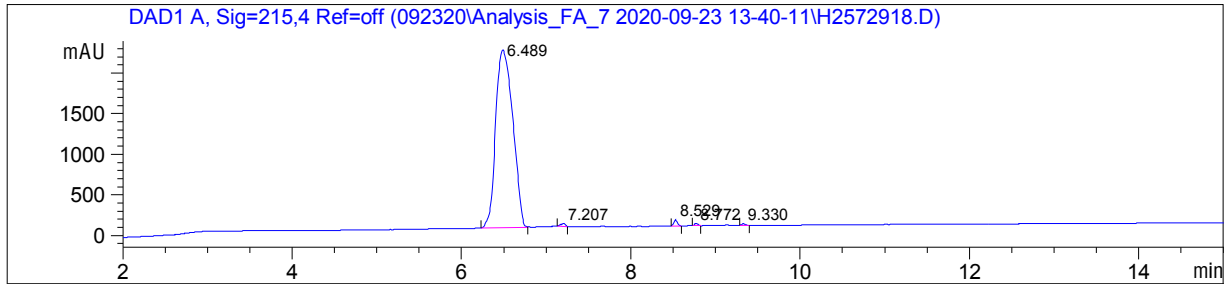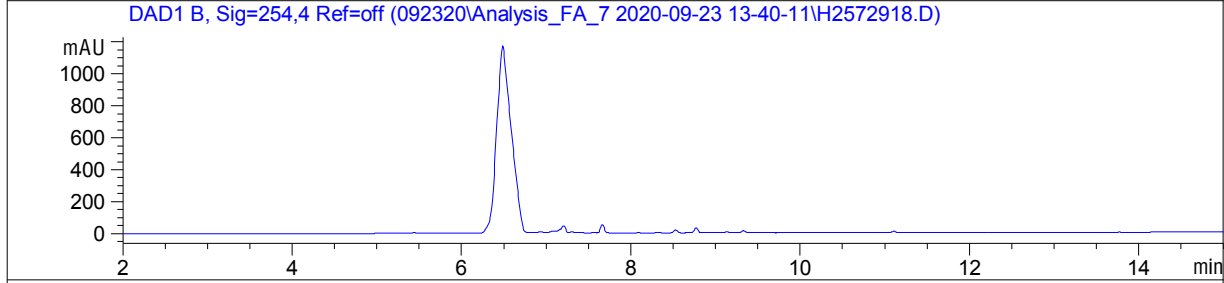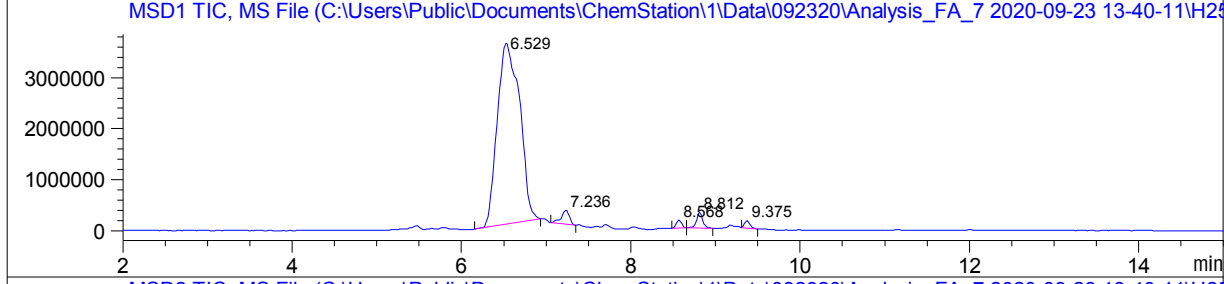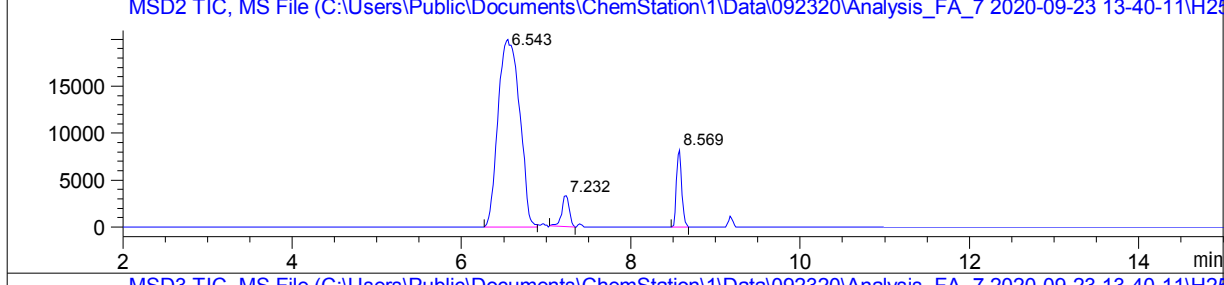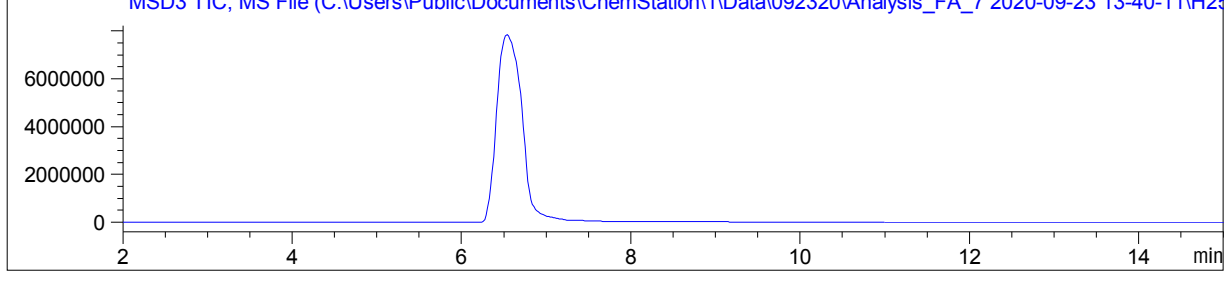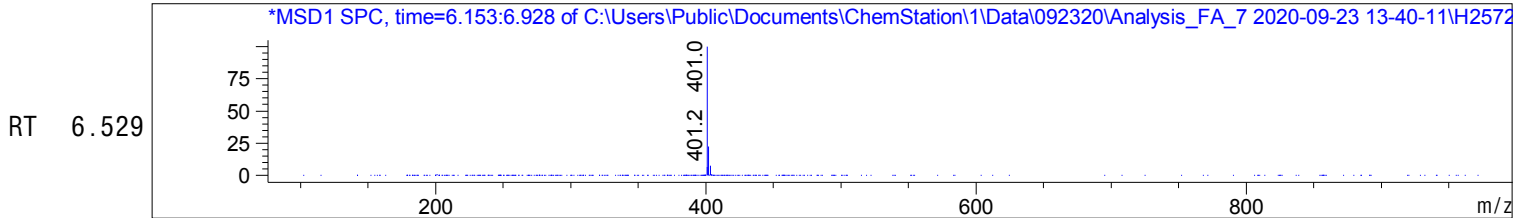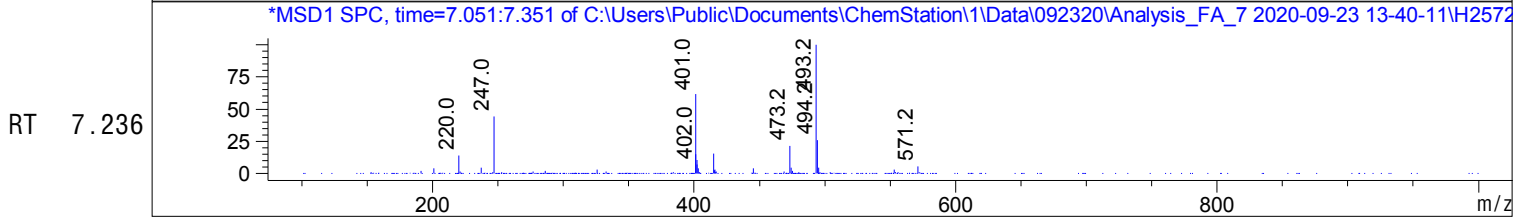

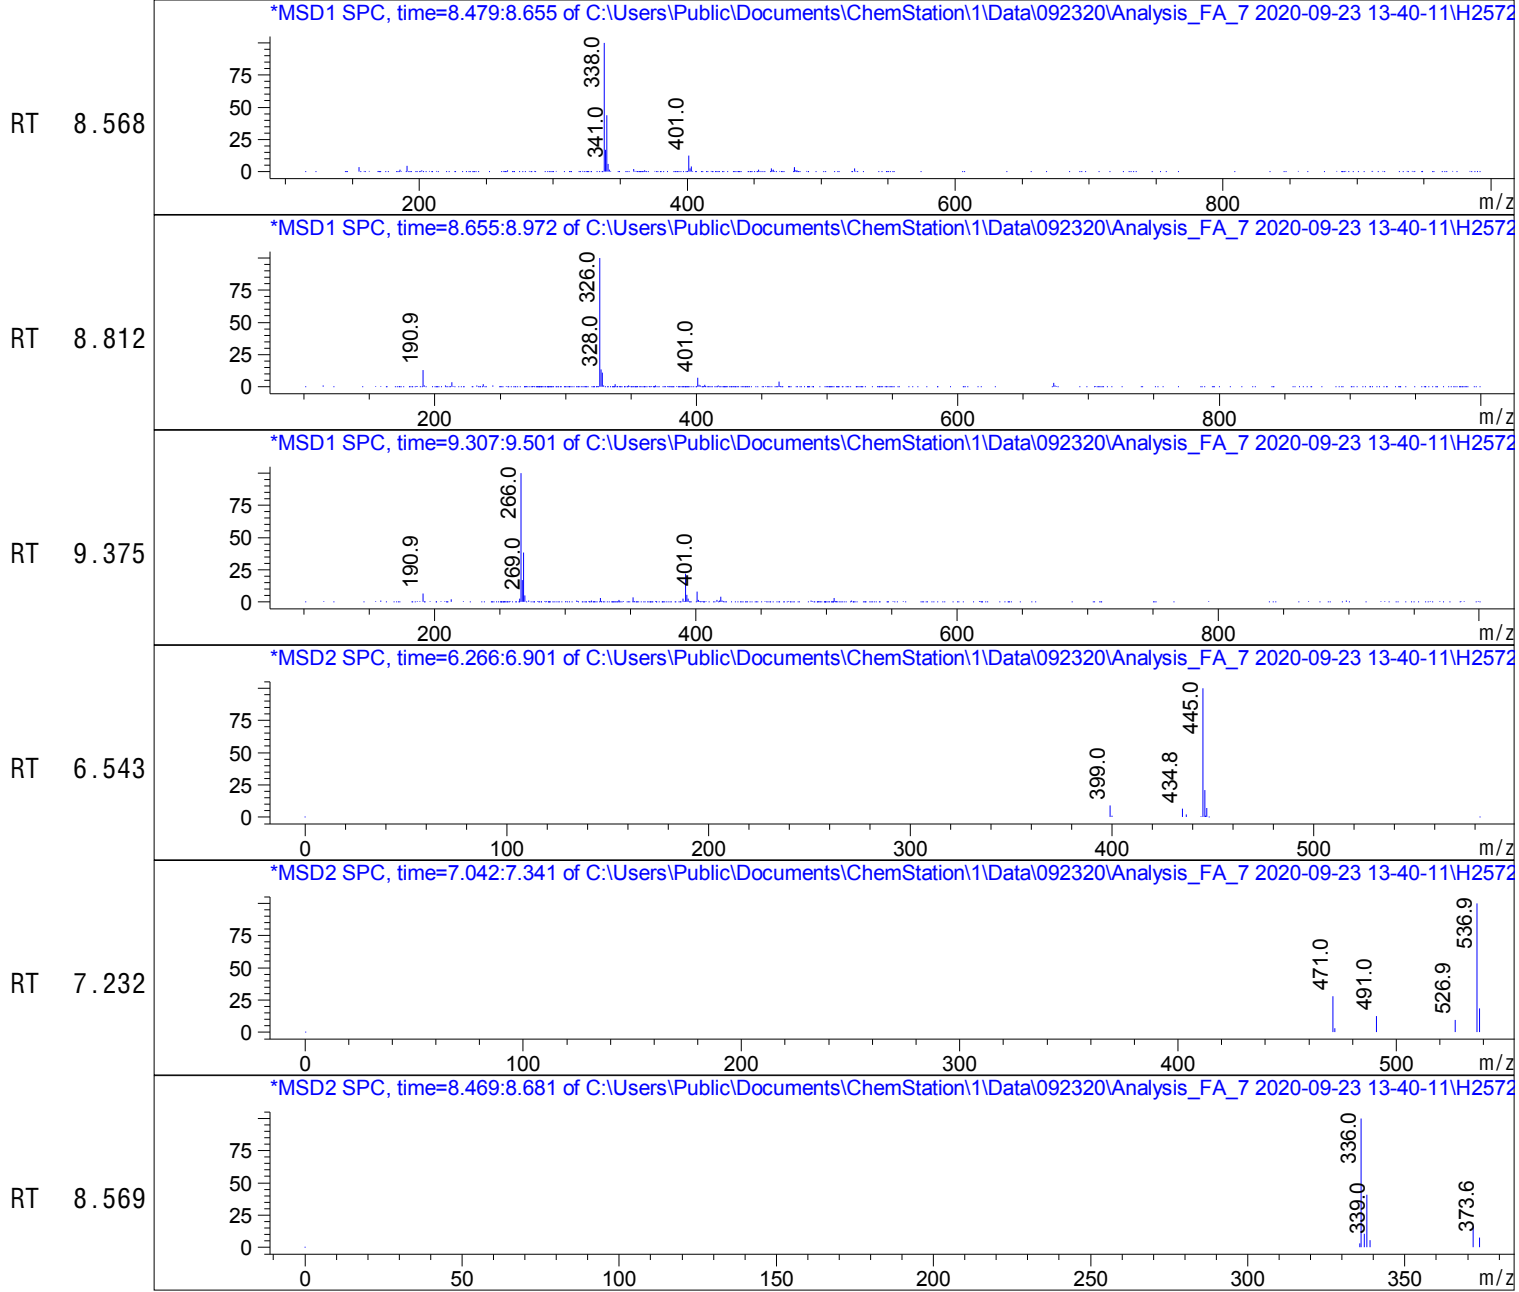

H2572918

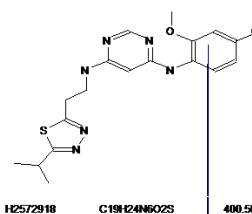

# Compound 24

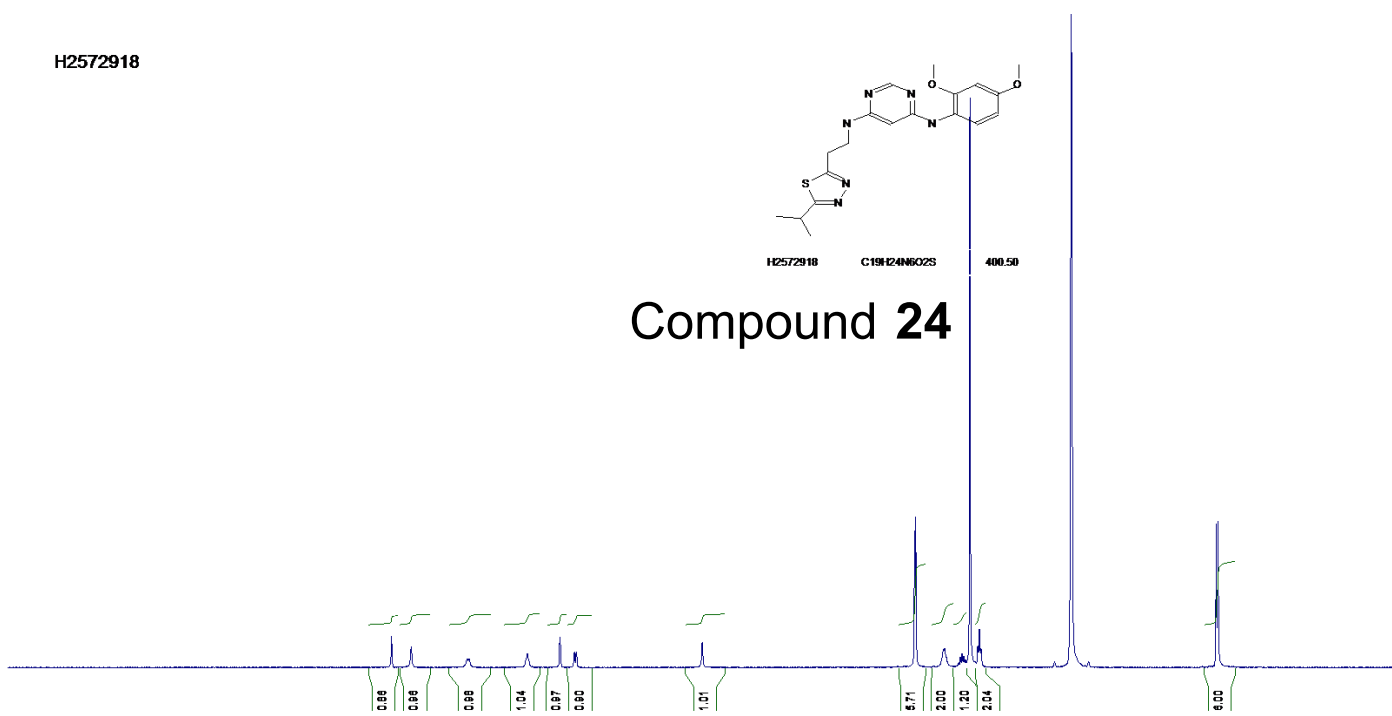

|                     |               |                  |           |                            |            |
|---------------------|---------------|------------------|-----------|----------------------------|------------|
| File name: H2572918 | Host: Hsncbar | SF: 499.8207 MHz | NSC: 0    | PW: 6.60 usec, RG: 40      | SE: 131072 |
| Date: 01-Dec-2020   | Solvent: dmsd | SW: 11364 Hz     | TE: 298 K | AQ: 2.82 sec, RD: 0.00 sec | H2572918   |

# Compound 25

Sample H2663691

0.1%FA-ACN 5-95%ACN 6 min. Zorbax-Eclipse-Plus C18 4,6 x 100mm, 3.5 mkm.

| # | Time  | Area%  |
|---|-------|--------|
| 1 | 3.891 | 100.00 |

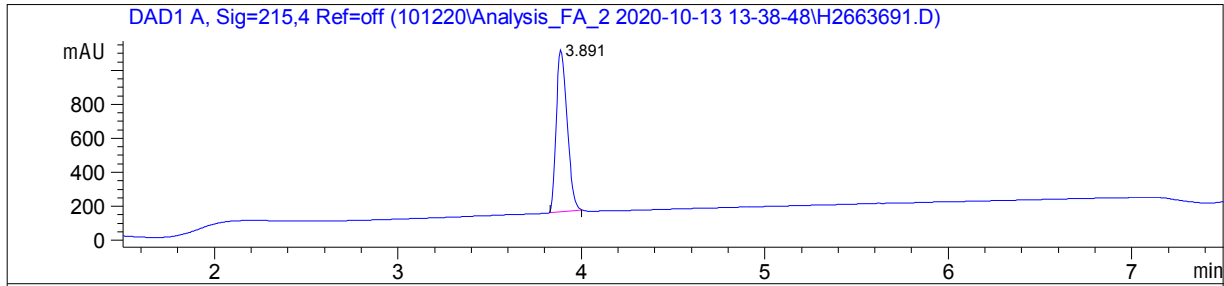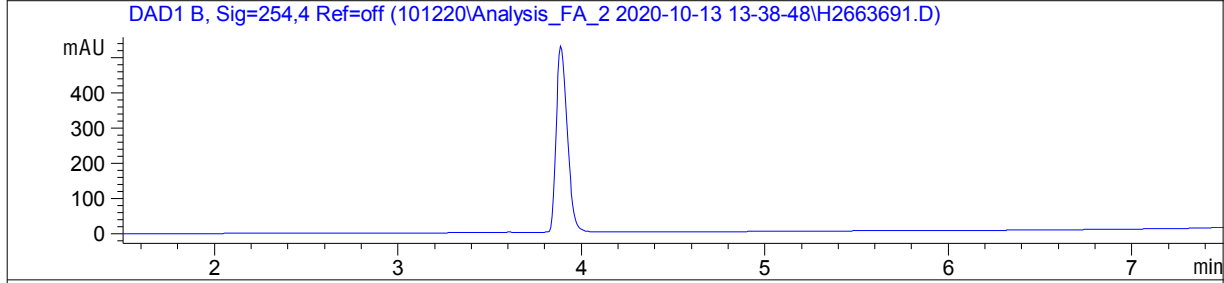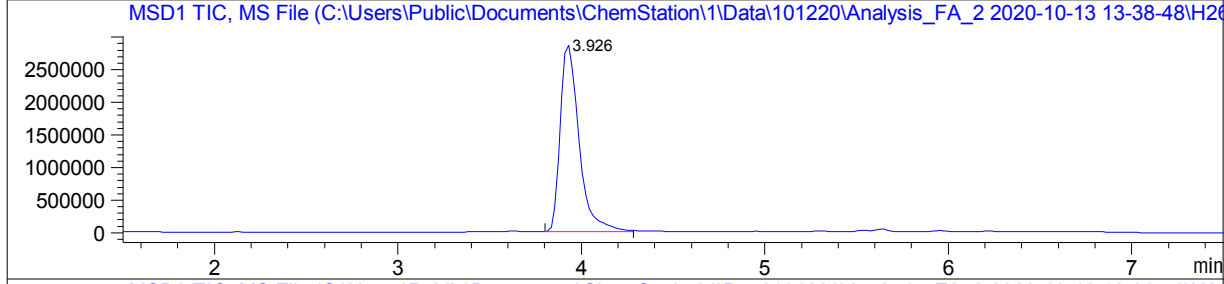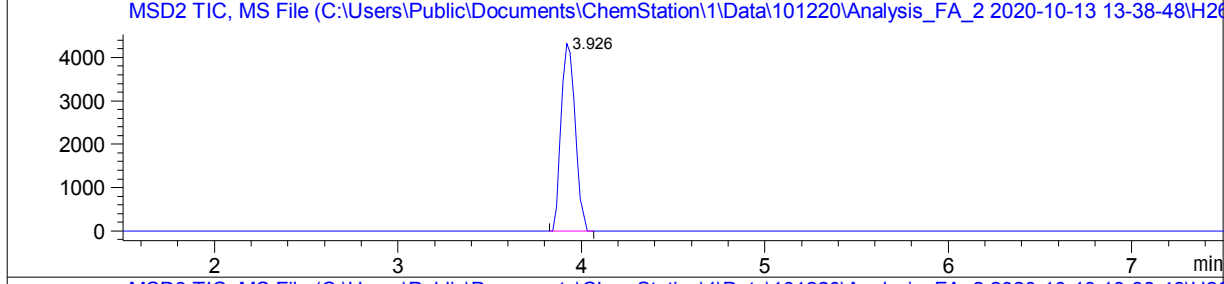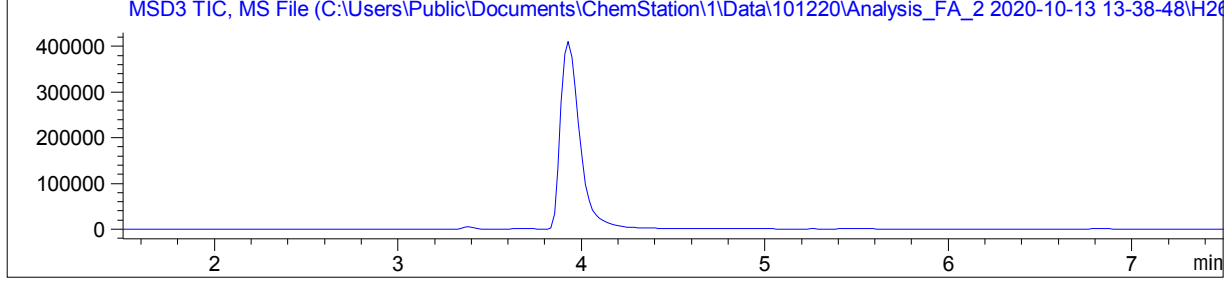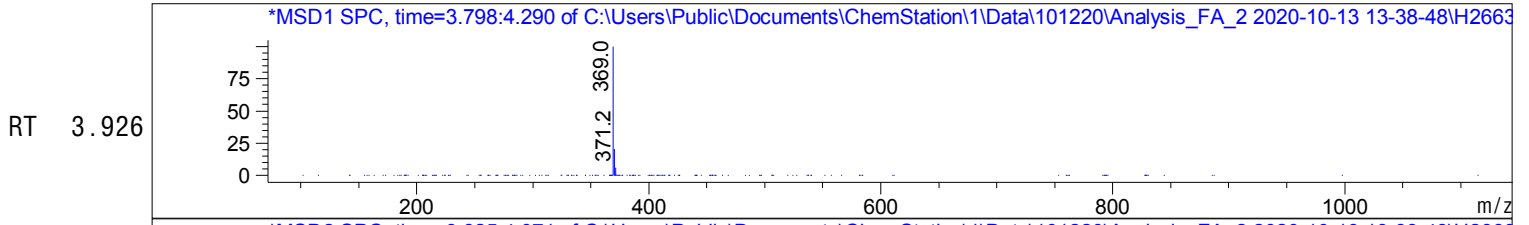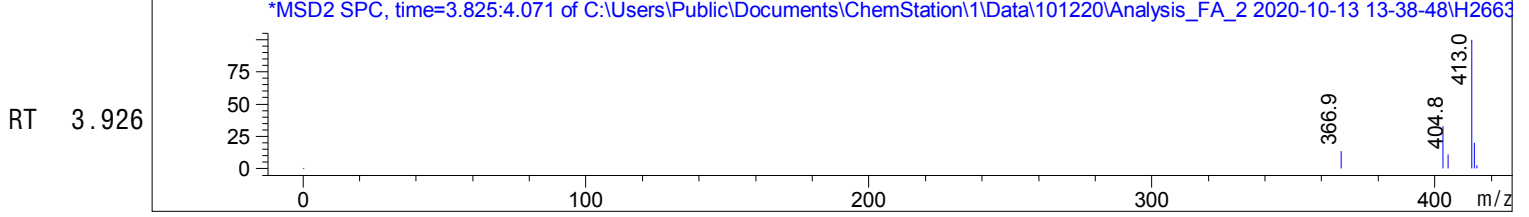

H2663691

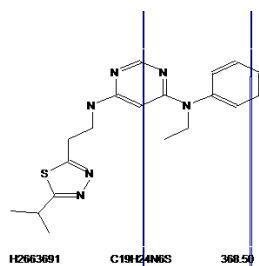

# Compound 25

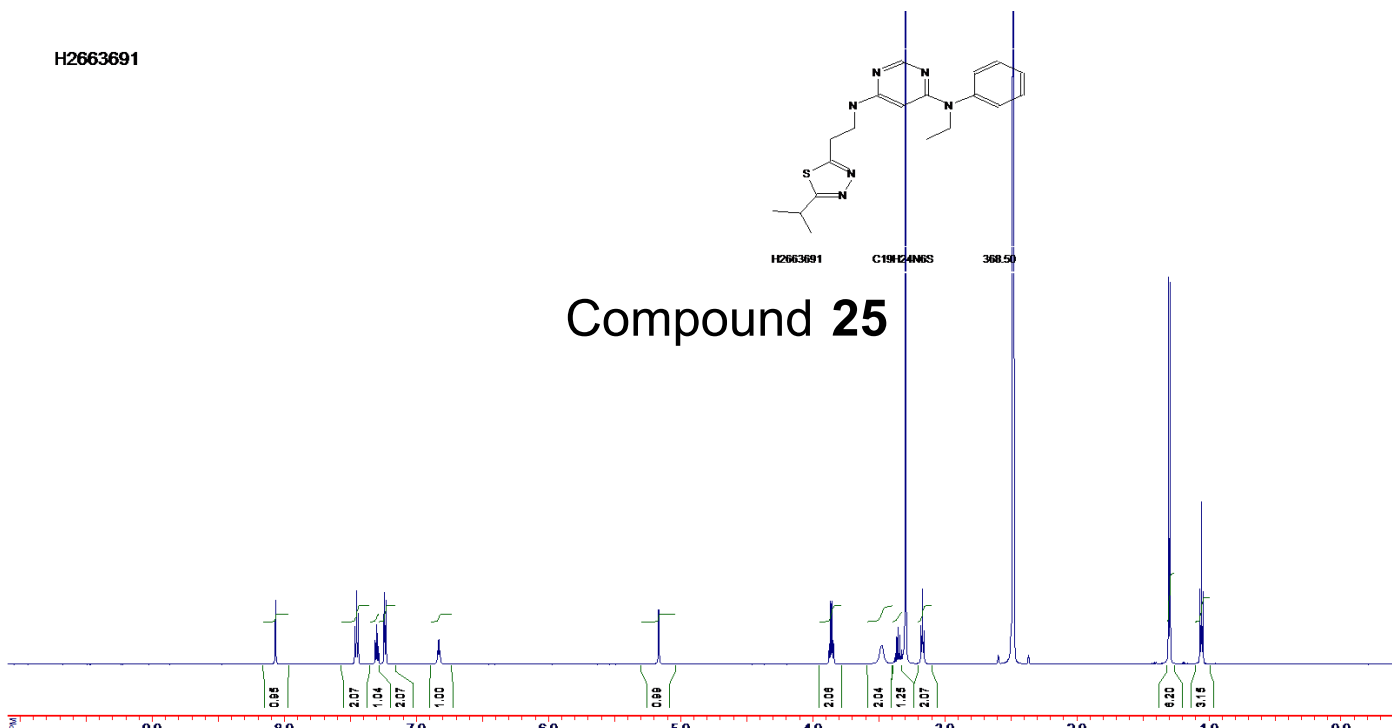

|                     |               |                  |           |                            |                 |
|---------------------|---------------|------------------|-----------|----------------------------|-----------------|
| File name: H2663691 | Hexachlor     | SF: 599.7811 MHz | NSC: 0    | PW: 4.40 usec, RG: 44      | SE 131072       |
| Date: 26-Nov-2020   | Solvent: dms0 | SW: 11364 Hz     | TE: 298 K | AQ: 2.82 sec, RD: 0.00 sec | <b>H2663691</b> |

# Compound 26

Sample H2660983

0.1%FA-ACN 5-95%ACN 6 min. Zorbax-Eclipse-Plus C18 4,6 x 100mm, 3.5 mkm.

| # | Time  | Area%  |
|---|-------|--------|
| 1 | 5.738 | 100.00 |

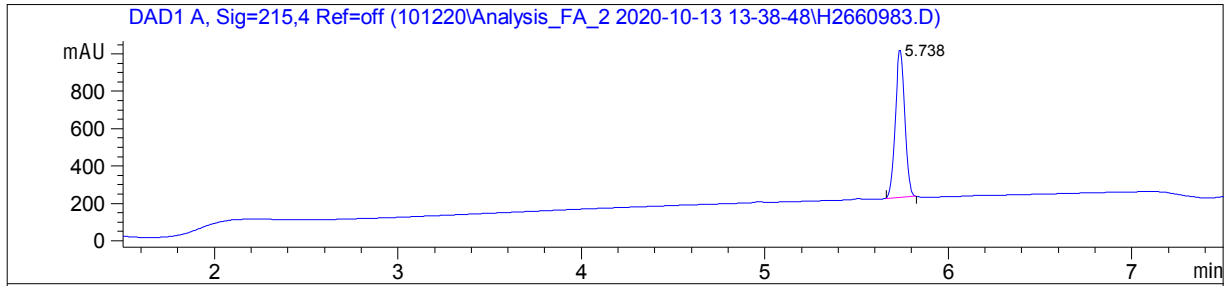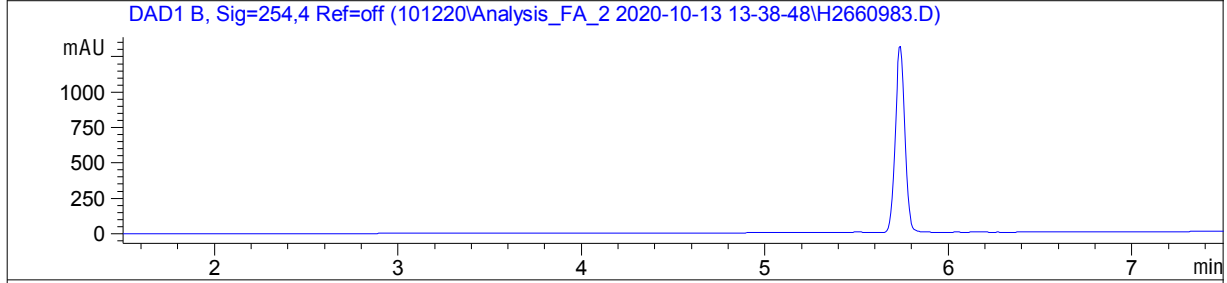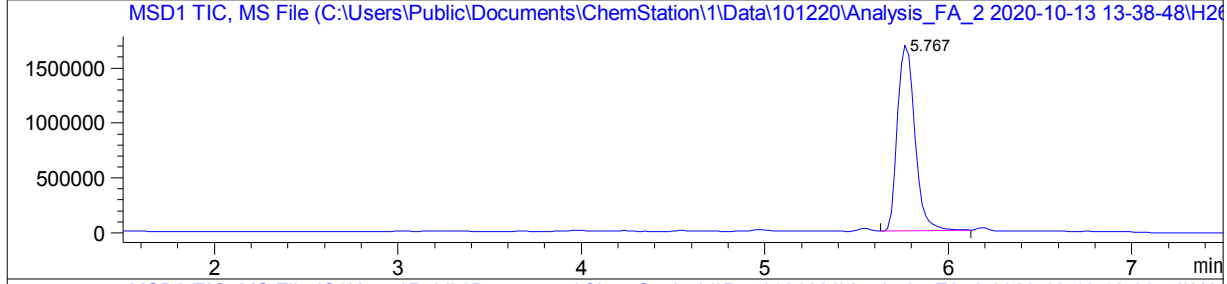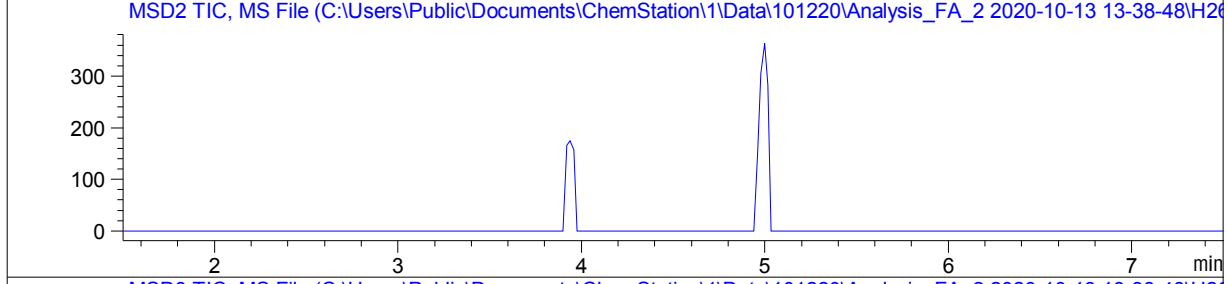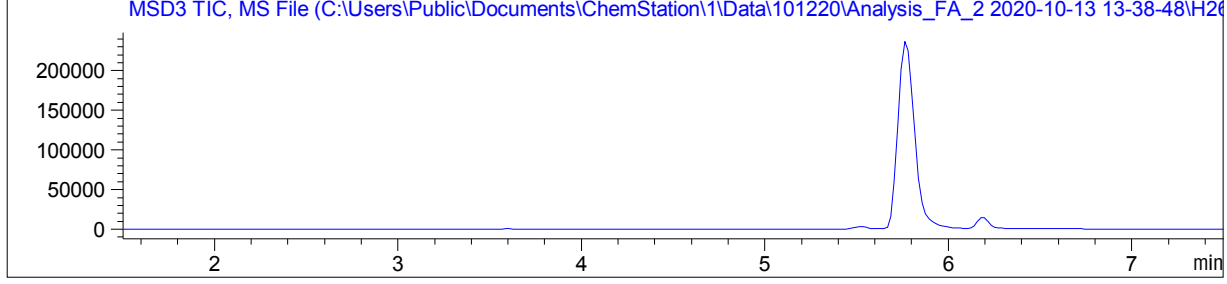

RT 5.767

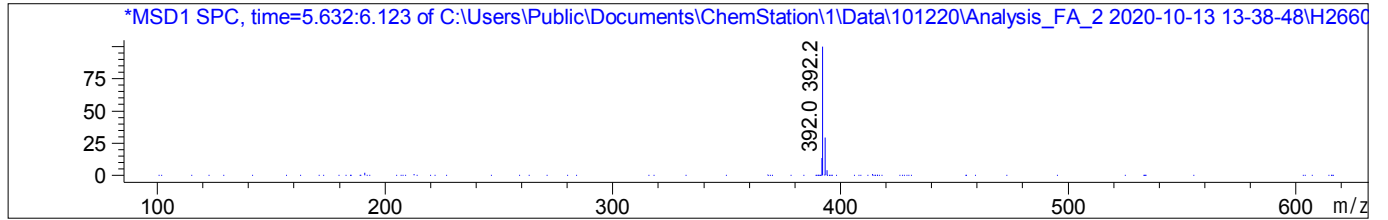

H2660983

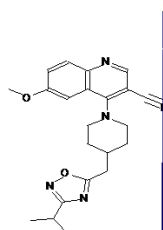

H2660983

C2H12N5O2

391.47

# Compound 26

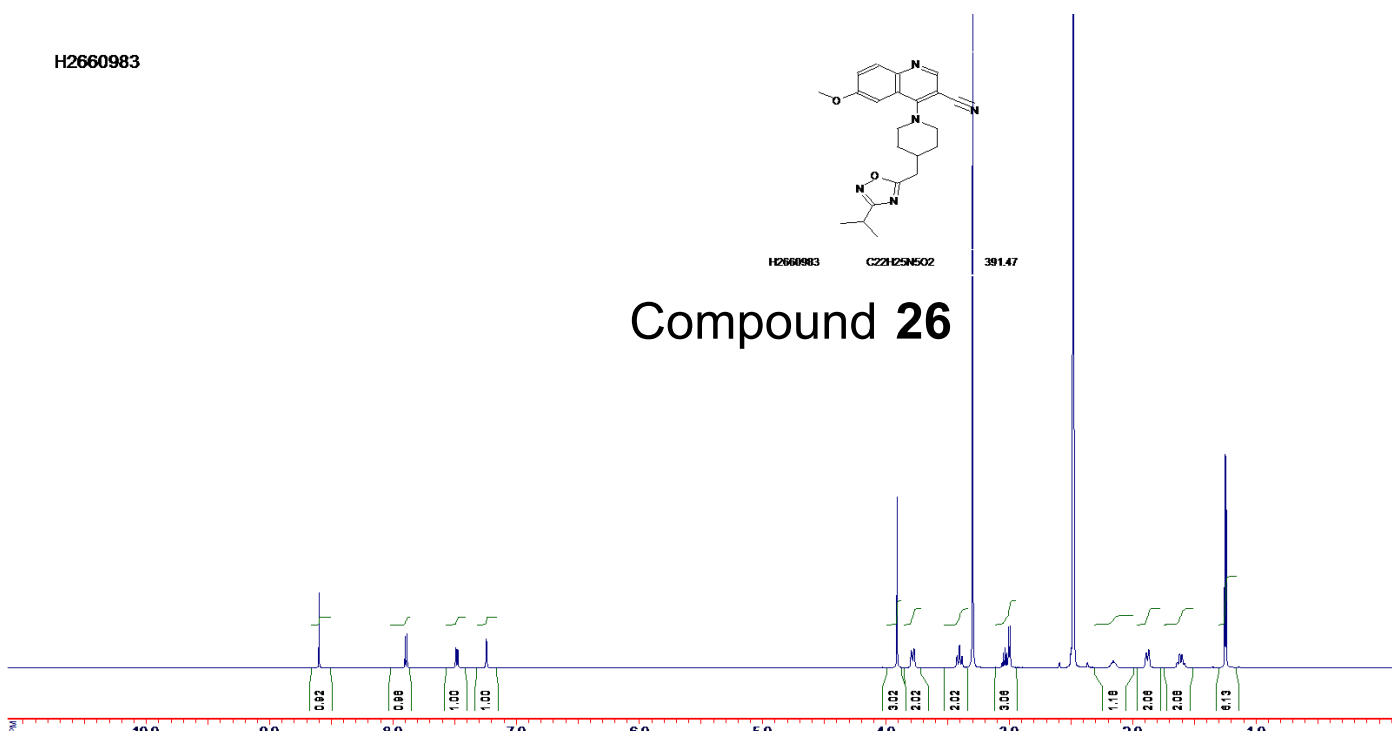

|                     |               |                  |           |                            |           |
|---------------------|---------------|------------------|-----------|----------------------------|-----------|
| File name: H2660983 | Host: Hachar  | SF: 599.7811 MHz | NSC: 0    | PW: 4.40 usec, RG: 44      | SE 131072 |
| Date: 26-Nov-2020   | Solvent: dmsd | SW: 11364 Hz     | TE: 298 K | AQ: 2.82 sec, RD: 0.00 sec | H2660983  |



# Compound 27

Sample H2663777

0.1%FA-ACN 5-95%ACN 6 min. Zorbax-Eclipse-Plus C18 4,6 x 100mm, 3.5 mk.

| # | Time  | Area%  |
|---|-------|--------|
| 1 | 6.171 | 100.00 |

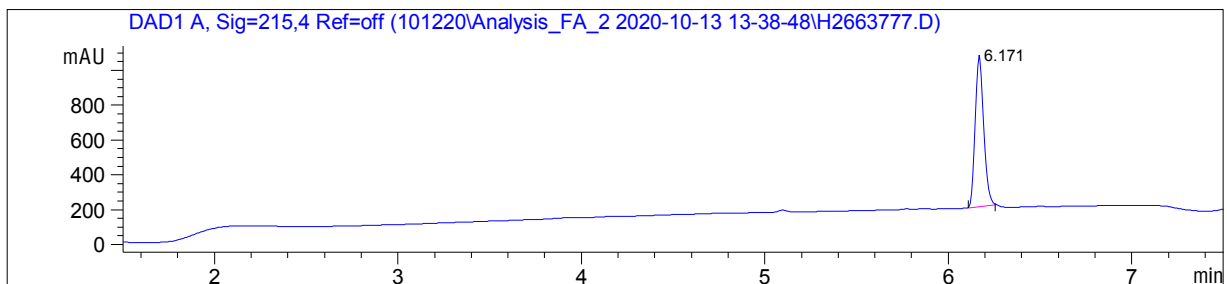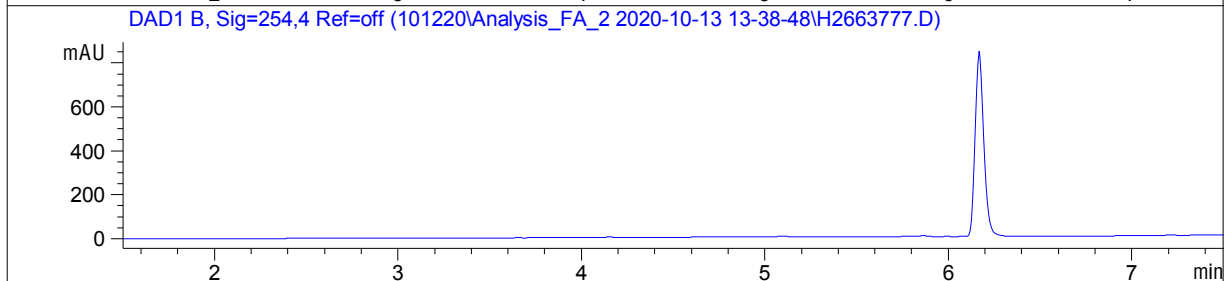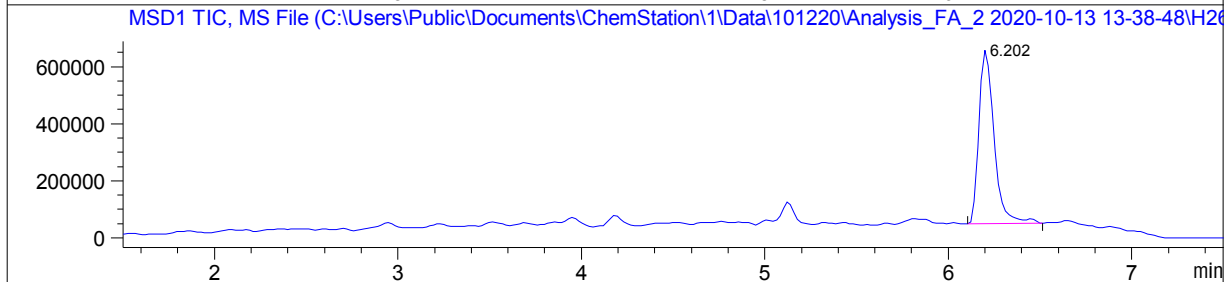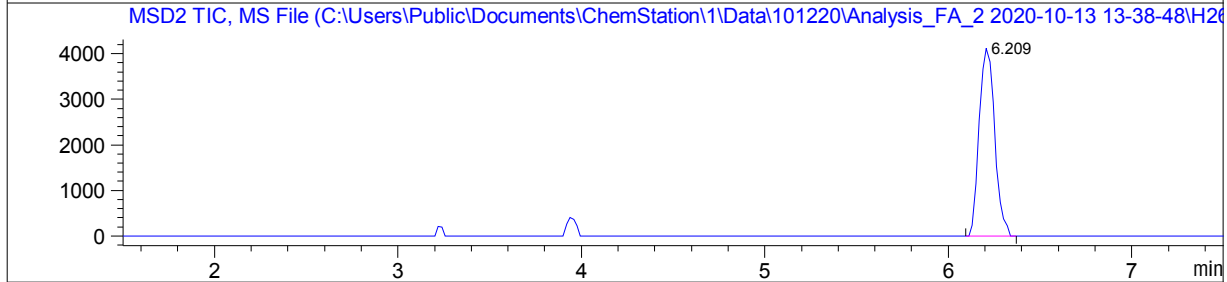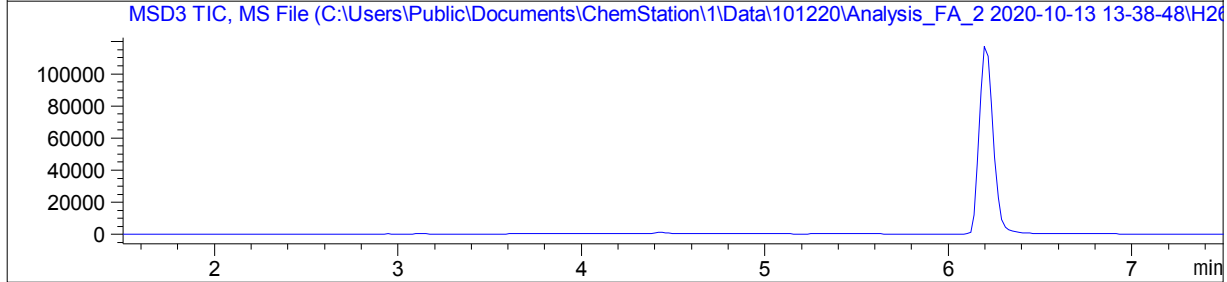

RT 6.202

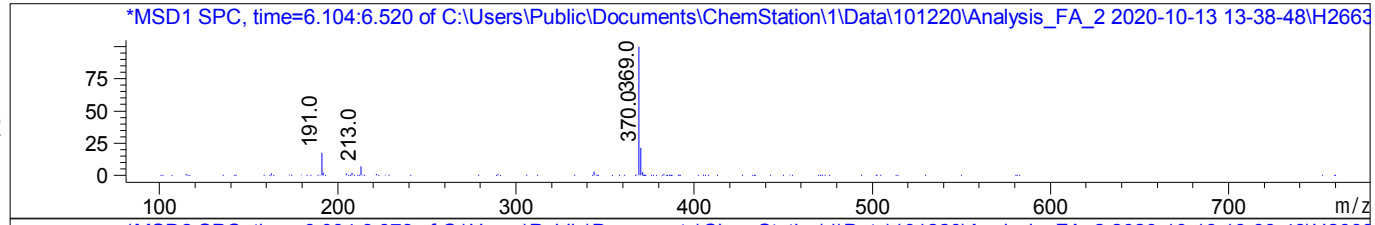

RT 6.209

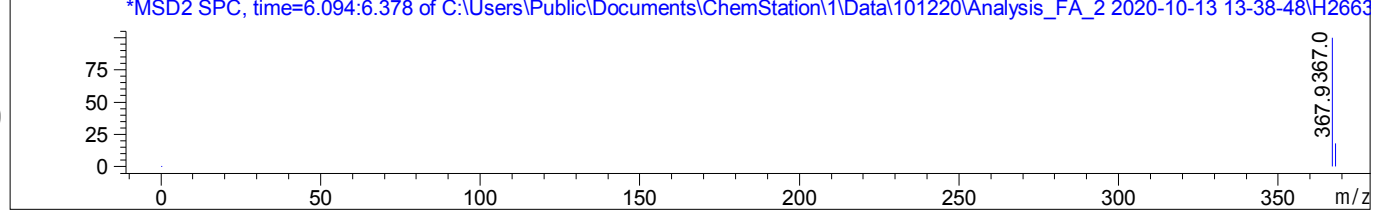

H2663777

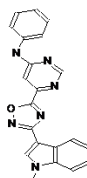

H2663777

C21H16N6O

368.40

# Compound 27

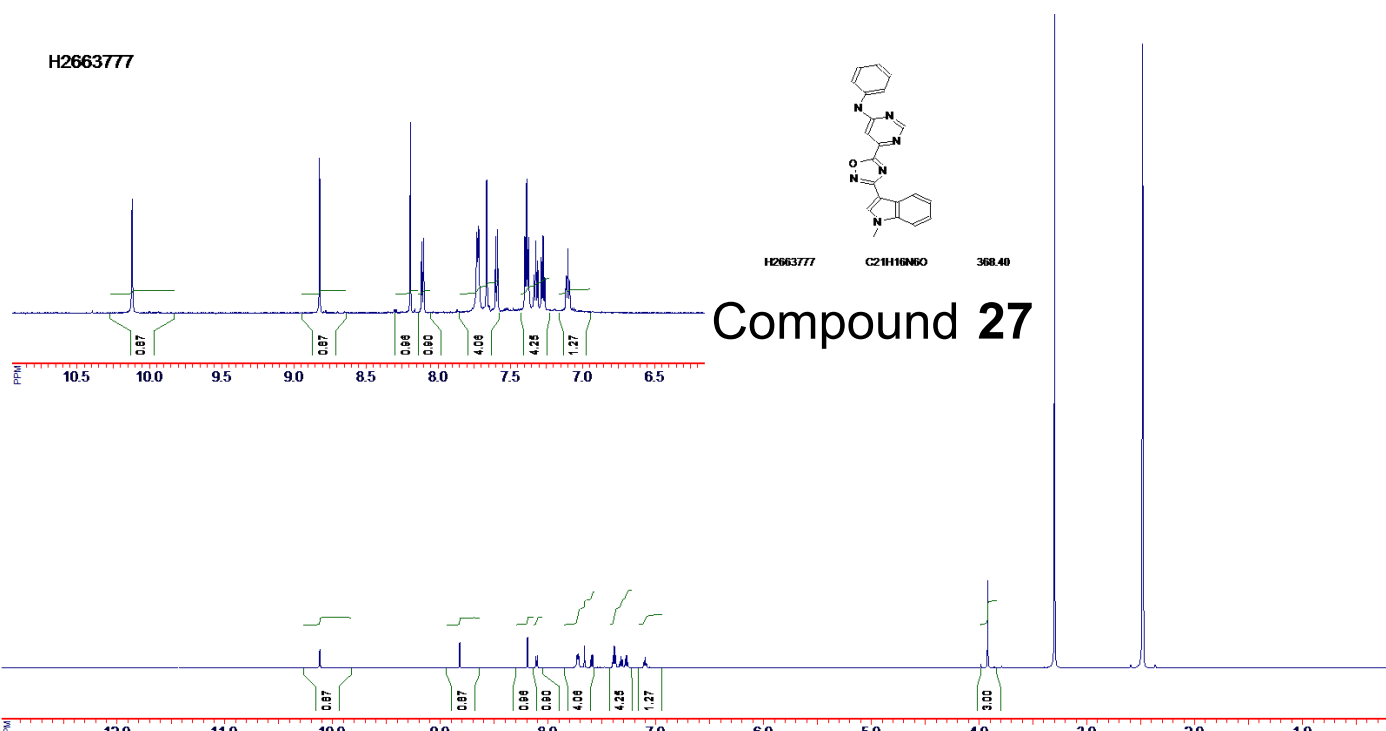

| File name: H2663777 | Host:char     | SF: 599.7811 MHz | NSC: 0    | PW: 4.40 usec, RG: 44      | SE 131072 |
|---------------------|---------------|------------------|-----------|----------------------------|-----------|
| Date: 26-Nov-2020   | Solvent: dms0 | SW: 11364 Hz     | TE: 298 K | AQ: 2.82 sec, RD: 0.00 sec | H2663777  |

# Compound 28

Sample H2670384

0.1%FA-ACN 5-95%ACN 6 min. Zorbax-Eclipse-Plus C18 4,6 x 100mm, 3.5 mkm.

| # | Time  | Area% |
|---|-------|-------|
| 1 | 2.648 | 0.35  |
| 2 | 3.153 | 95.66 |
| 3 | 4.237 | 2.50  |
| 4 | 4.694 | 1.49  |

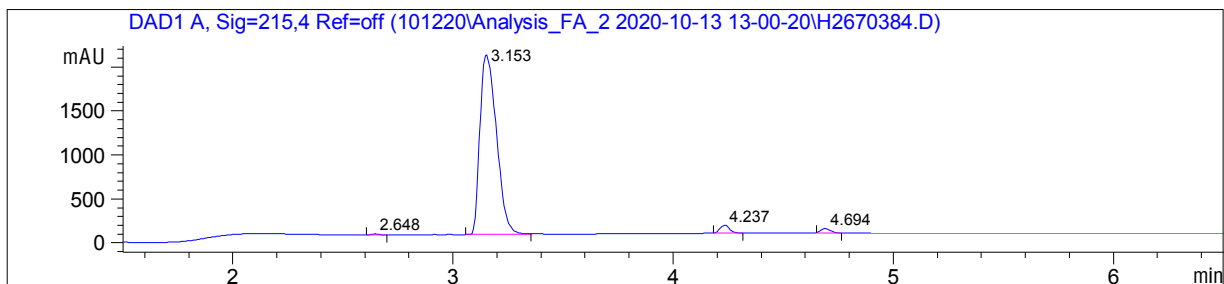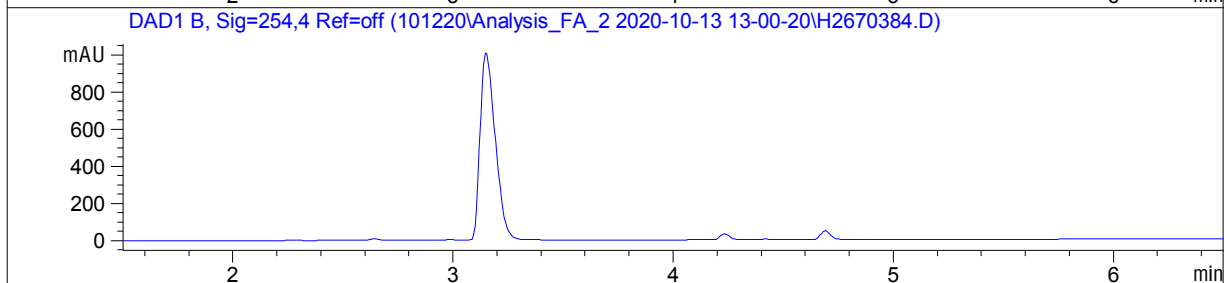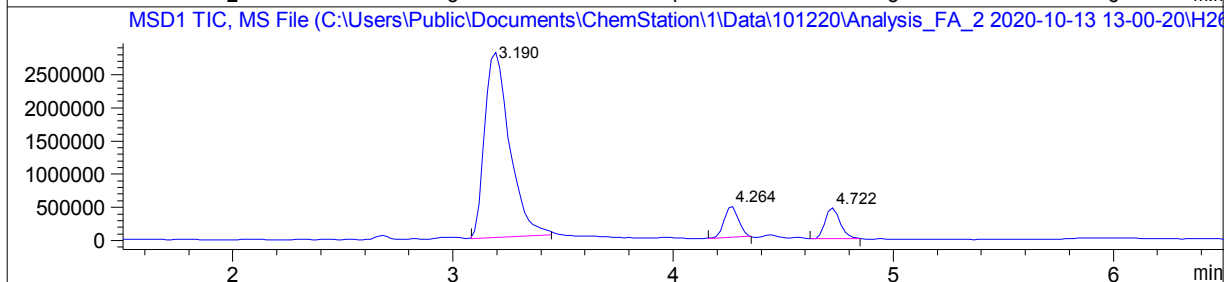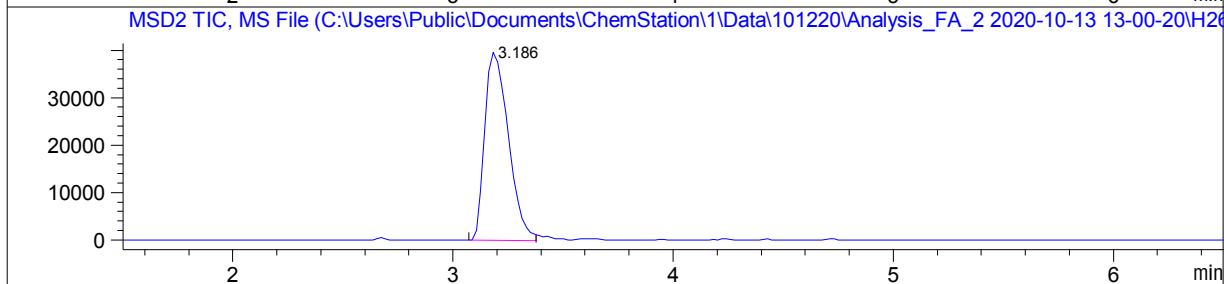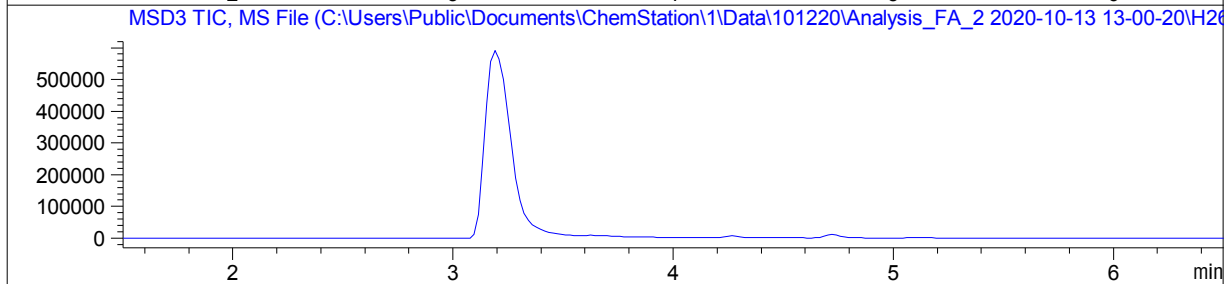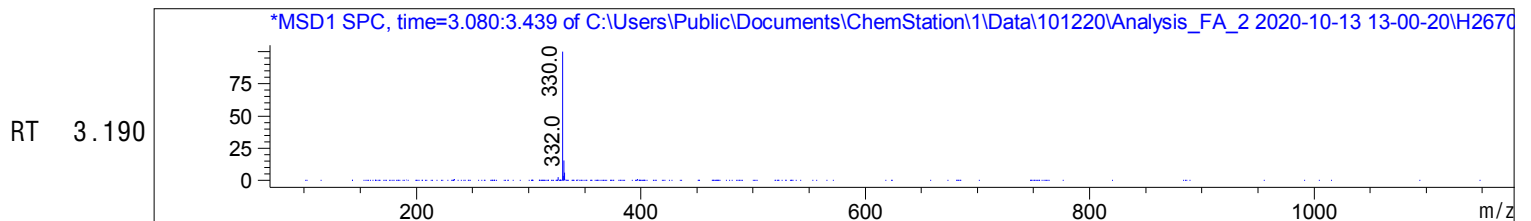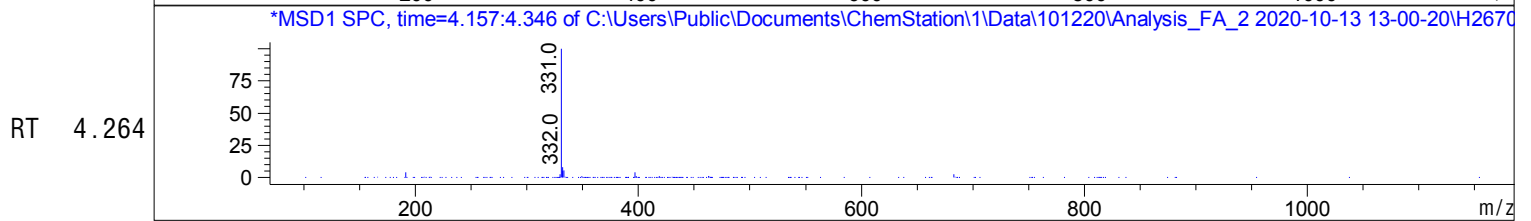

RT 4.722

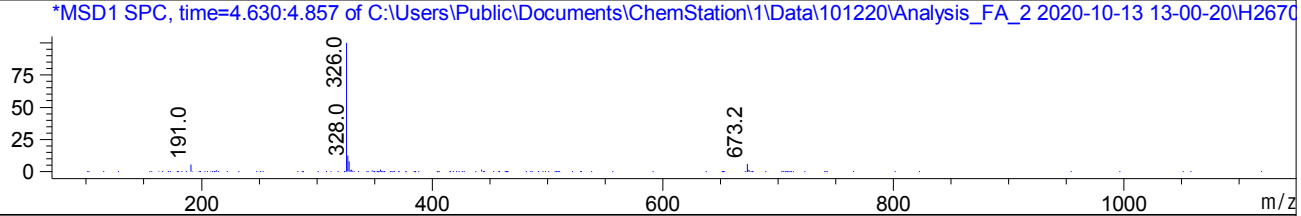

RT 3.186

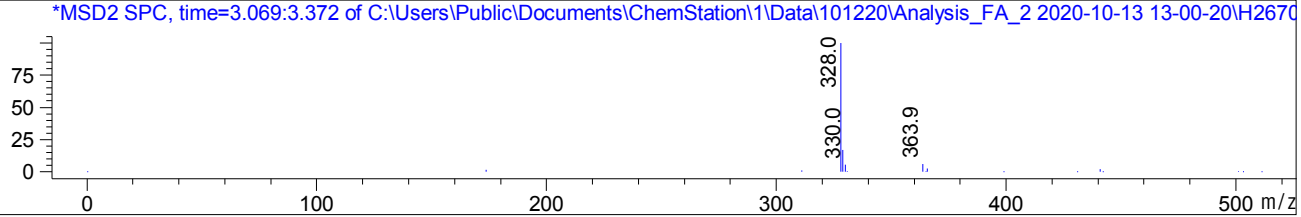

H2670384

# Compound 28

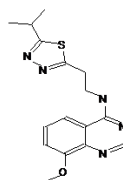

H2670384

C18H19N5OS

329.42

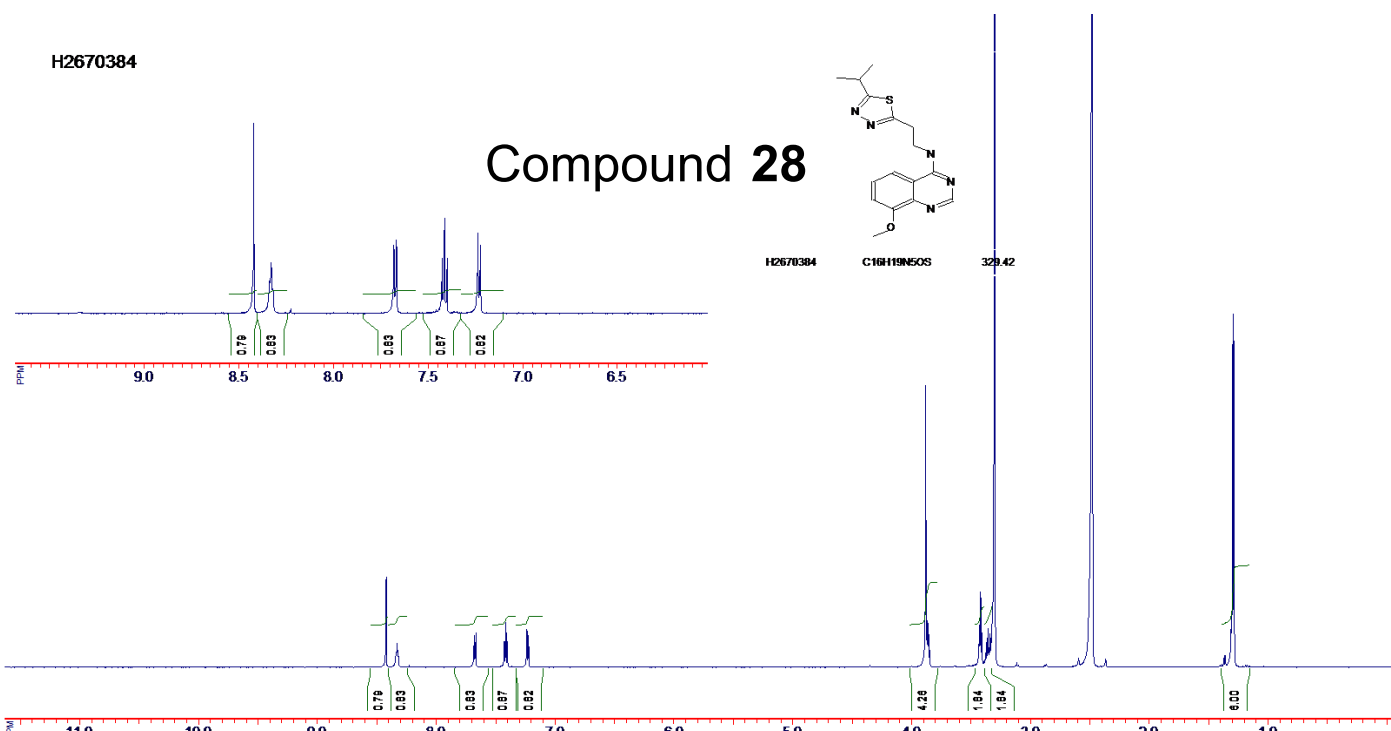

|                     |                |                  |           |                            |           |
|---------------------|----------------|------------------|-----------|----------------------------|-----------|
| File name: H2670384 | Host: H2670384 | SF: 599.7811 MHz | NSC: 0    | PW: 4.40 usec, RG: 44      | SE 131072 |
| Date: 26-Nov-2020   | Solvent: dmsd  | SW: 11364 Hz     | TE: 298 K | AQ: 2.82 sec, RD: 0.00 sec | H2670384  |

MaxPeak: 100.00%  
Ret\_Time: 1.245 min

# S089971\$6

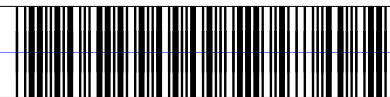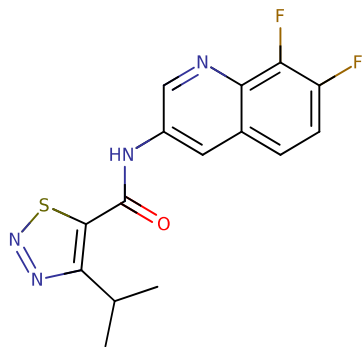

**Mol Wt** 334.34  
**Exact Mass** 334.08

| # | Time  | Area%  |
|---|-------|--------|
| 1 | 1.245 | 100.00 |

## Compound 29

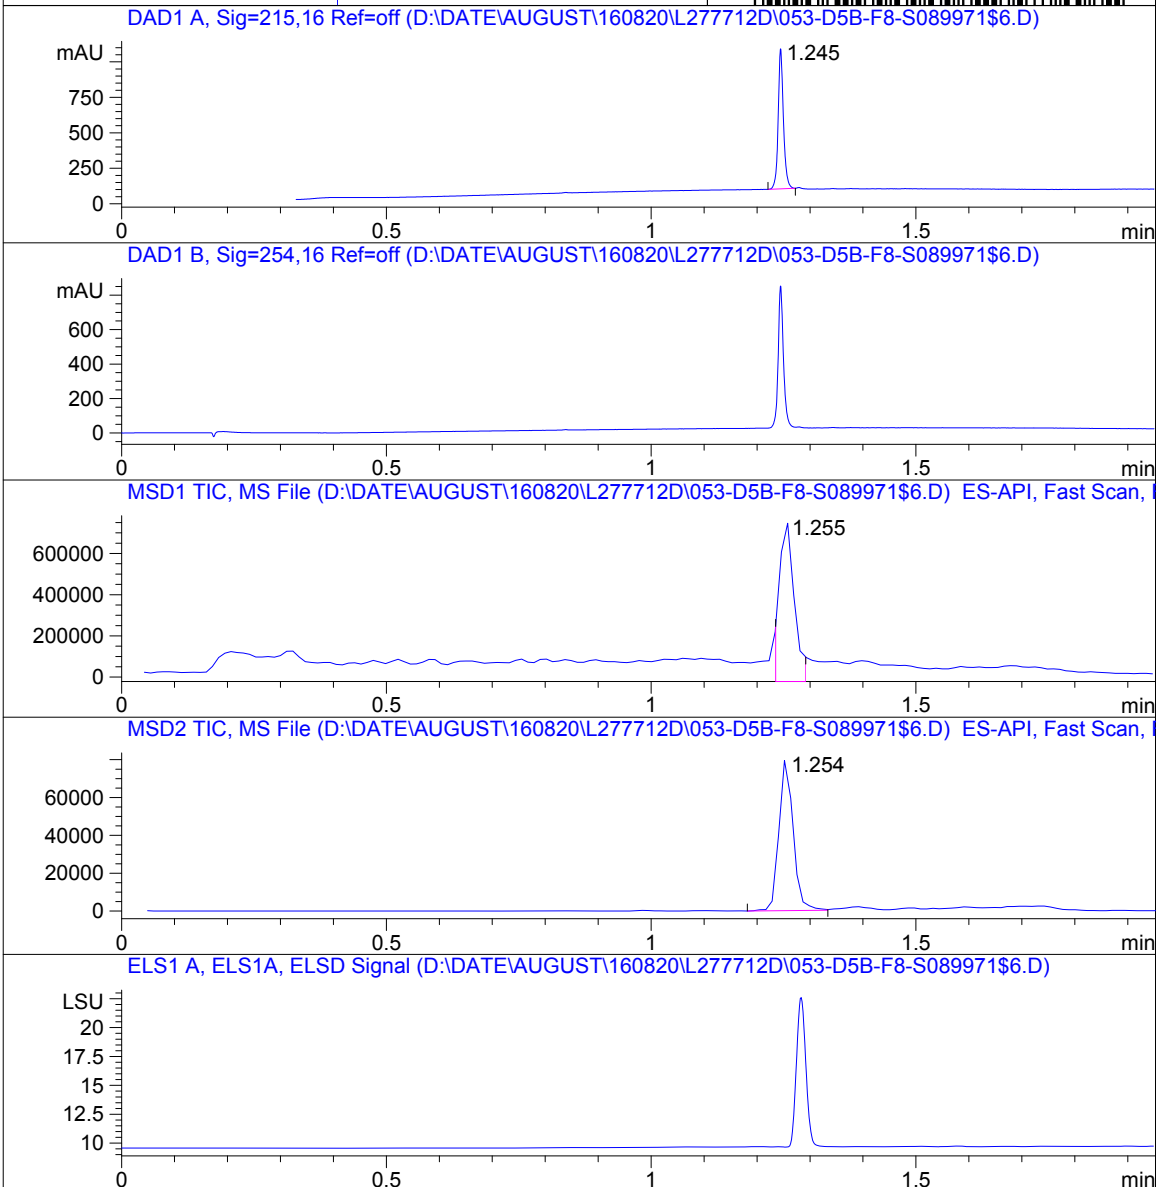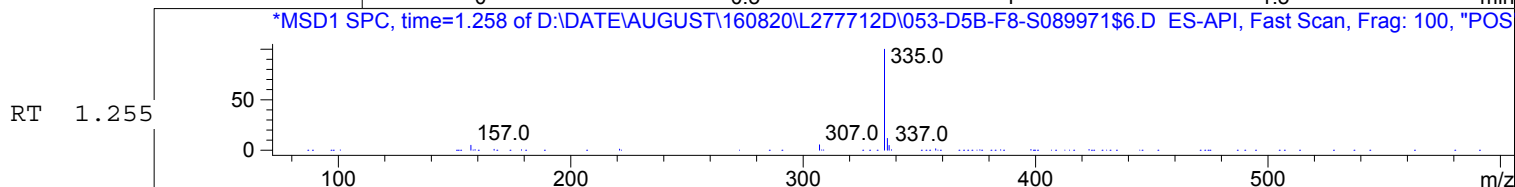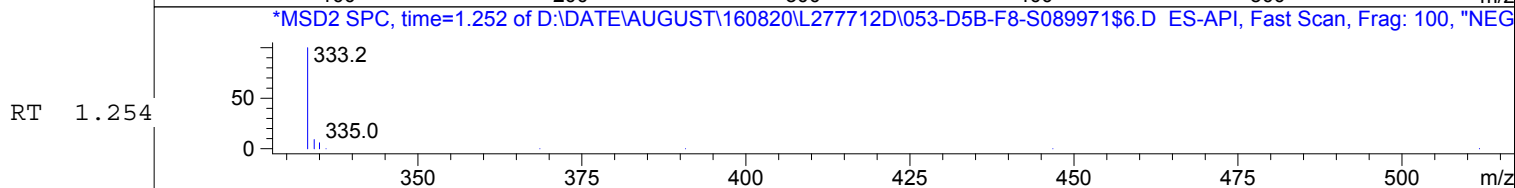

H2563045

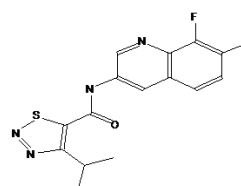

H2563045 C15H12F2N4OS 334.34

# Compound 29

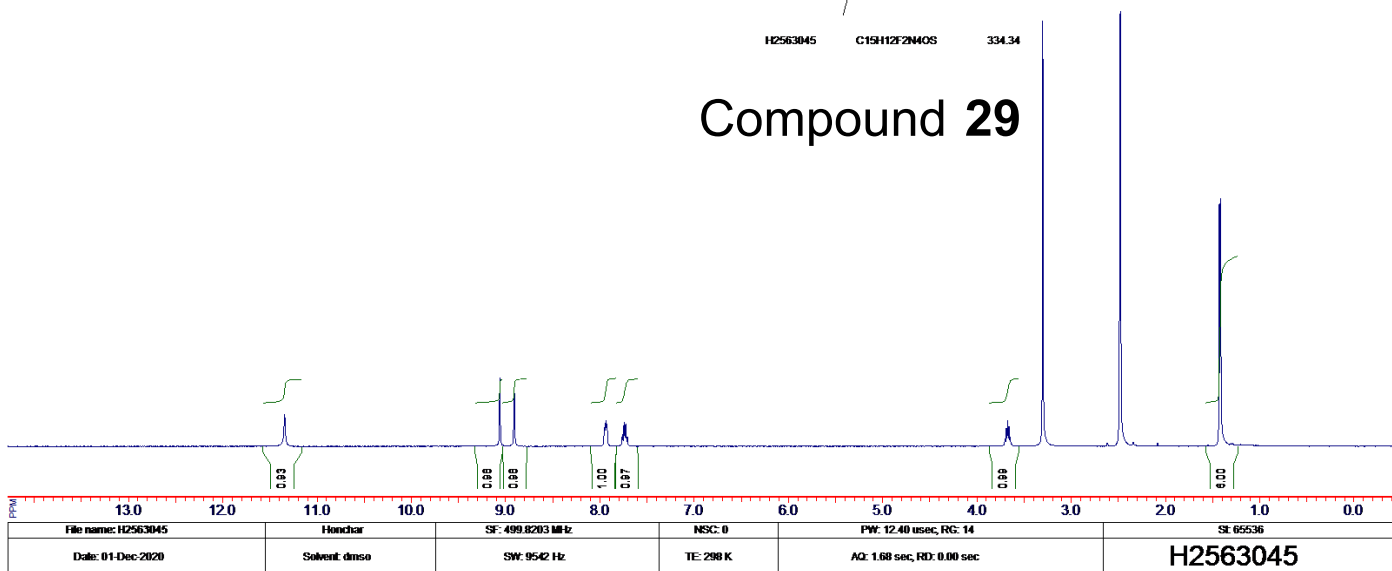

# Compound 30

MaxPeak: 100.00%  
Ret\_Time: 1.273 min

## S089954\$3

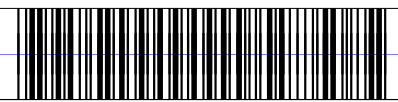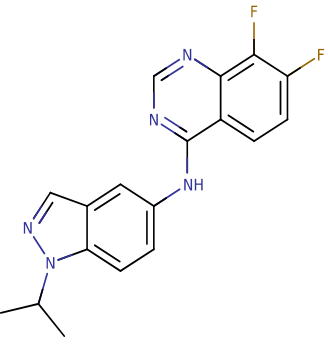

Mol Wt 339.34  
Exact Mass 339.15

| # | Time  | Area%  |
|---|-------|--------|
| 1 | 1.273 | 100.00 |

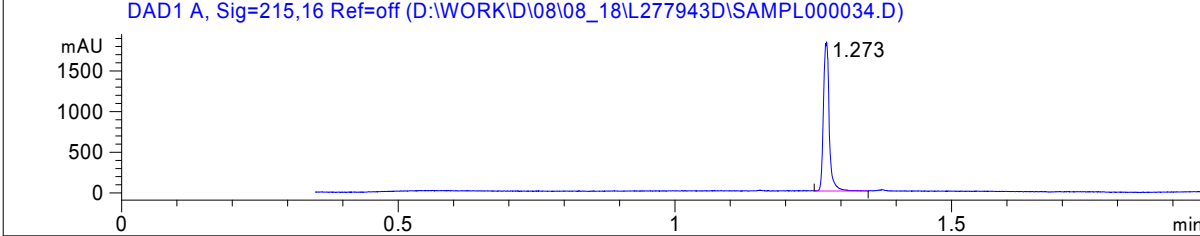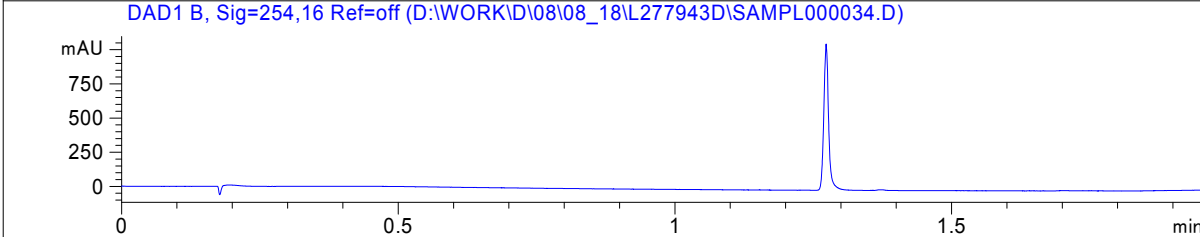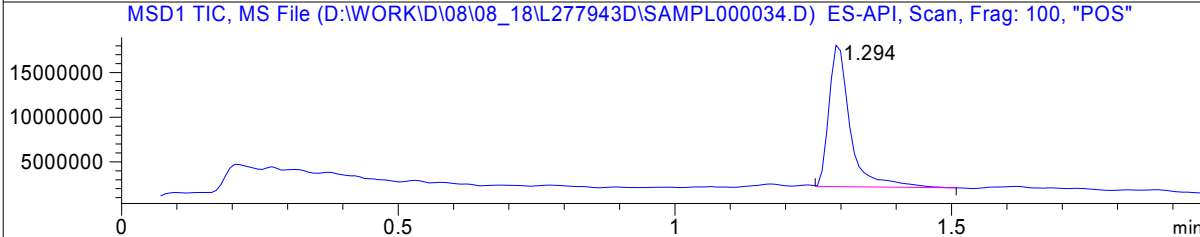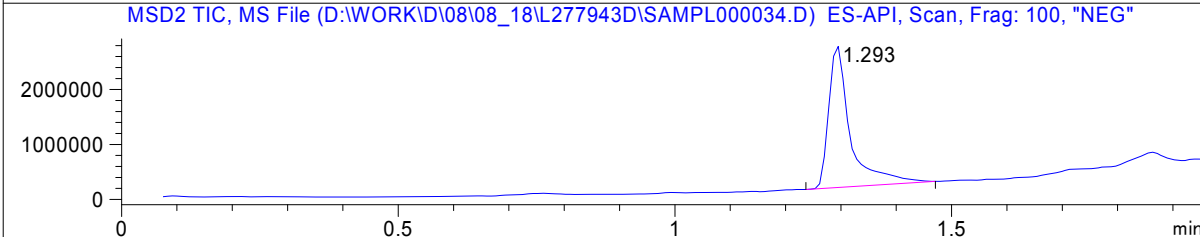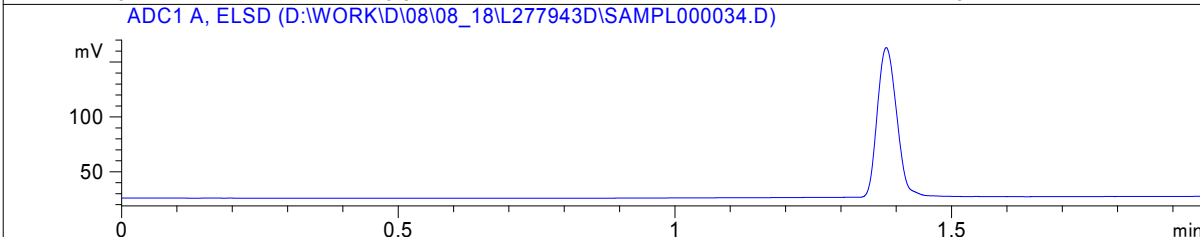

RT 1.294

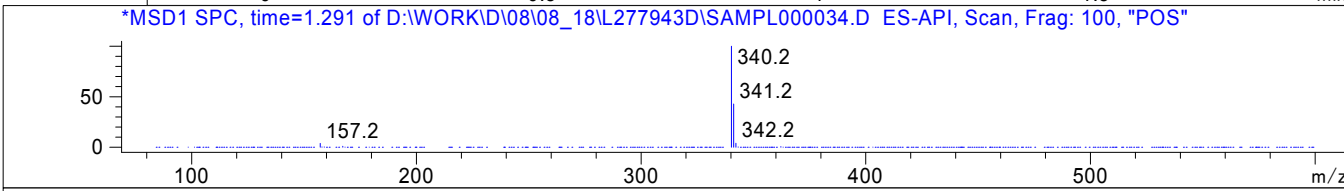

RT 1.293

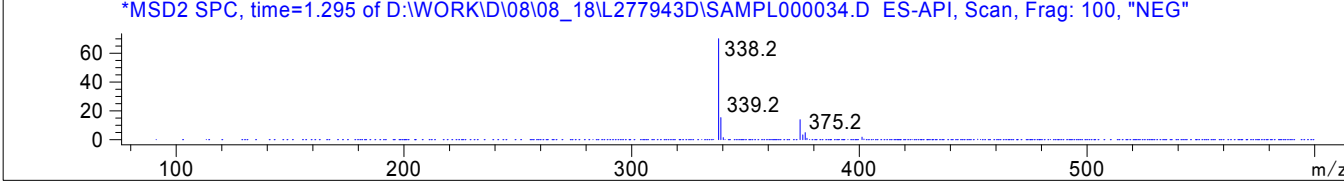



H2565633

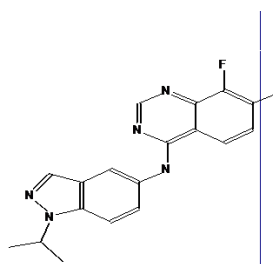

H2565633

C18H15F2N5

338.35

# Compound 30

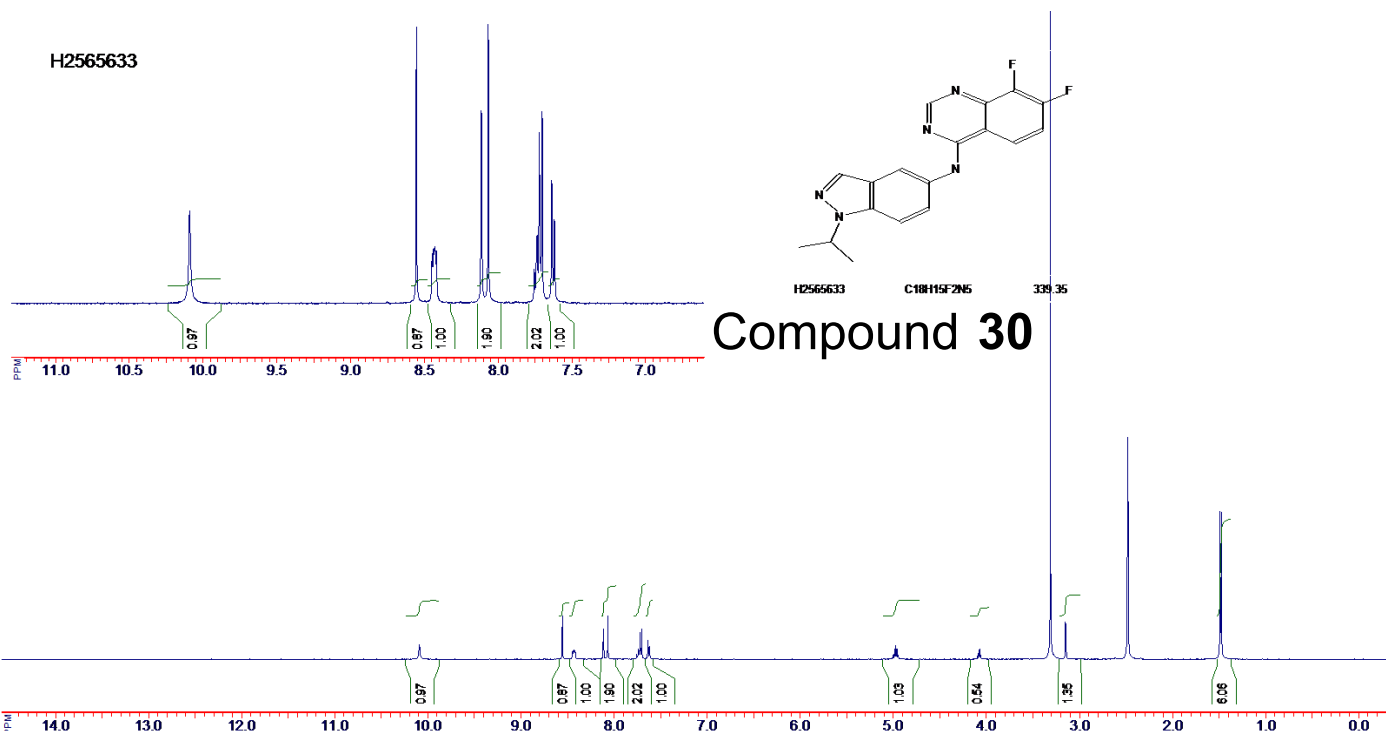

|                     |                    |                  |           |                            |           |
|---------------------|--------------------|------------------|-----------|----------------------------|-----------|
| File name: H2565633 | Operator: Victoria | SF: 499.0203 MHz | NSC: 0    | PW: 12.40 usec, RG: 20     | SI: 65536 |
| Date: 01-Dec-2020   | Solvent: dmsd      | SW: 9542 Hz      | TE: 298 K | AQ: 1.68 sec, RD: 0.00 sec |           |

# Compound 31

Sample  
H2674289

0.1%FA-ACN 5-95%ACN 6 min. Zorbax-Eclipse-Plus C18 4,6 x  
100mm, 3.5 mkm.

| # | Time  | Area% |
|---|-------|-------|
| 1 | 2.259 | 2.14  |
| 2 | 3.763 | 0.89  |
| 3 | 6.448 | 0.80  |
| 4 | 6.849 | 96.18 |

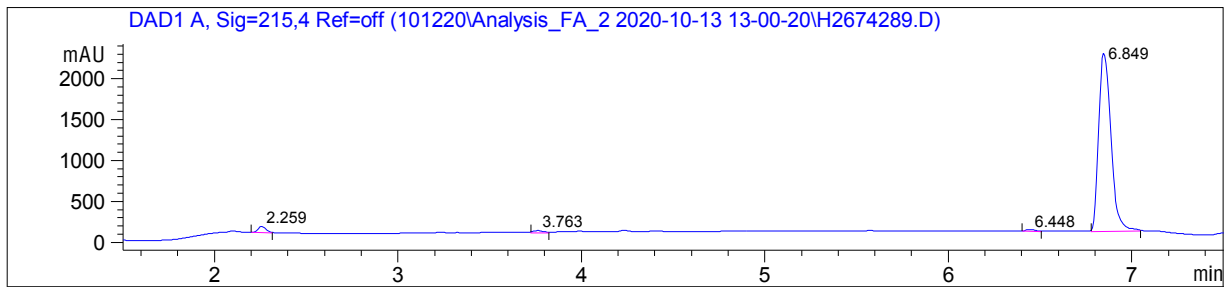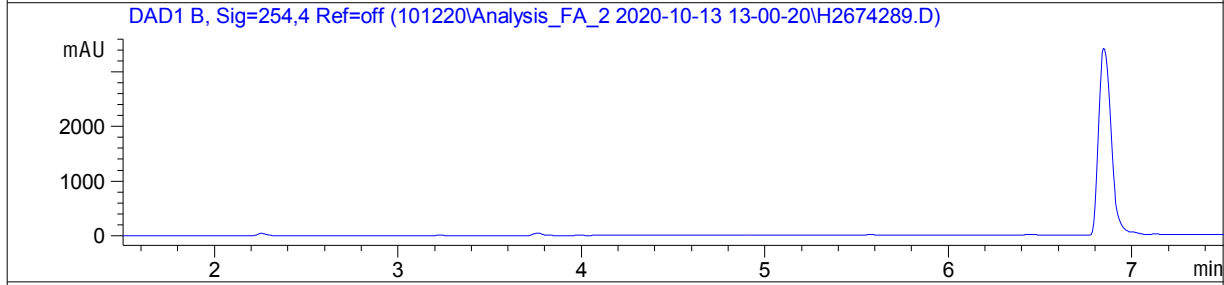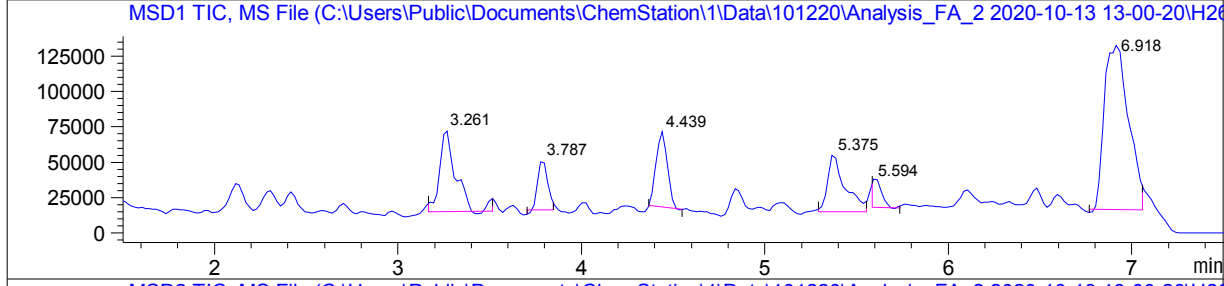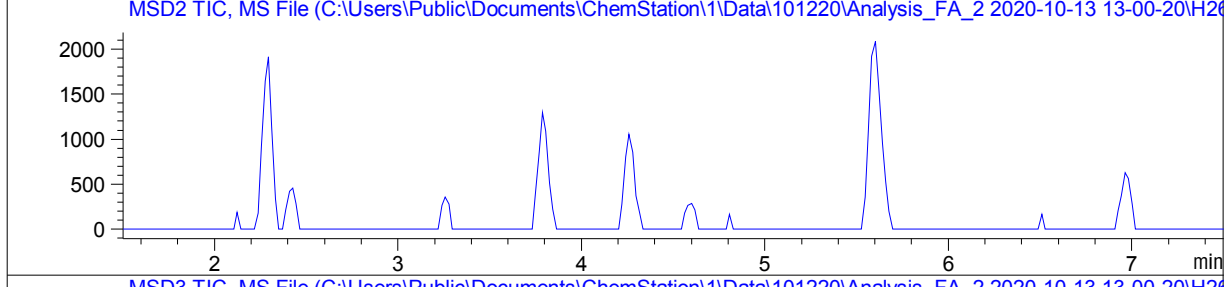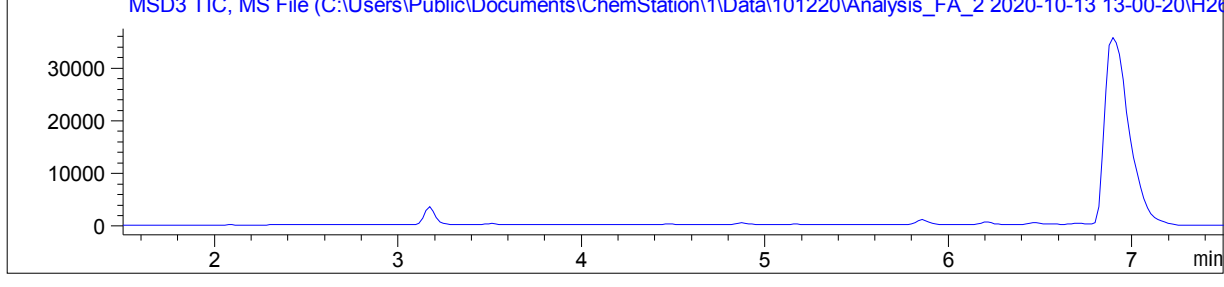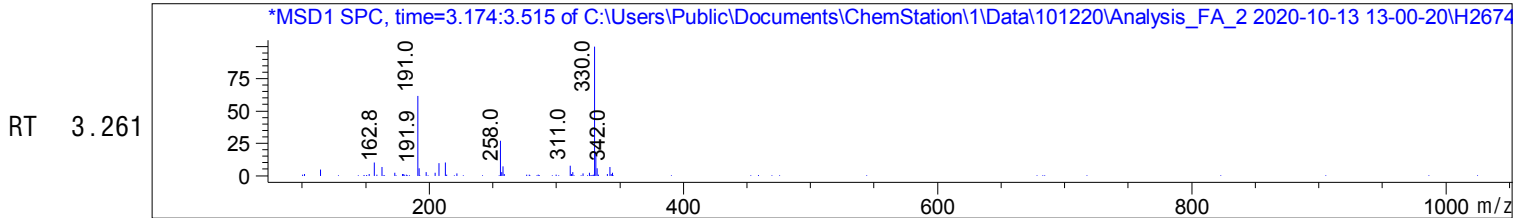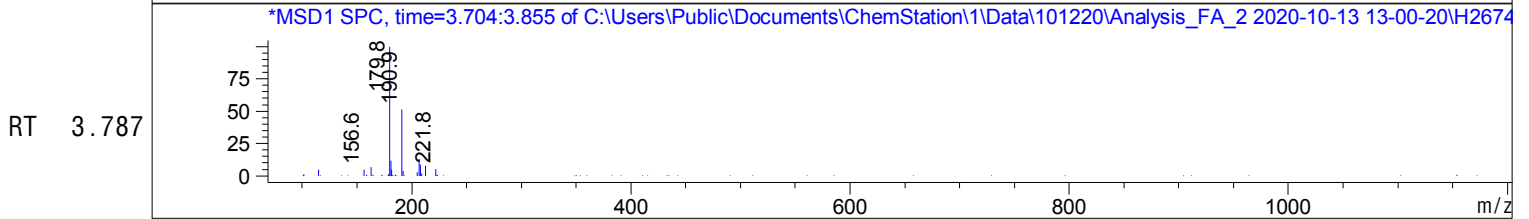

RT 4.439

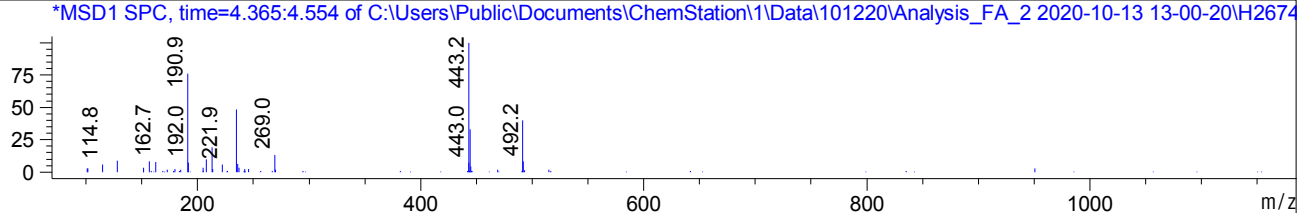

RT 5.375

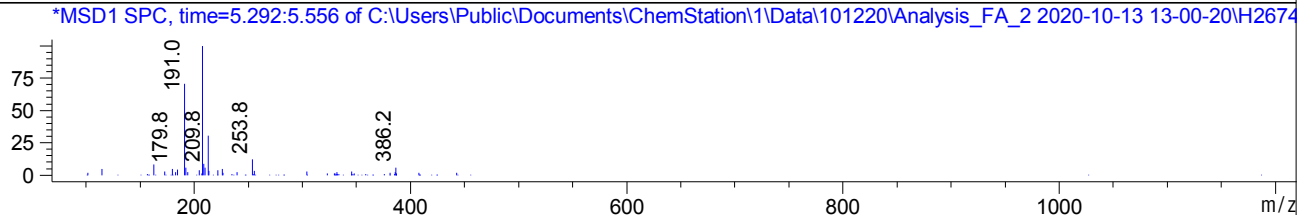

RT 5.594

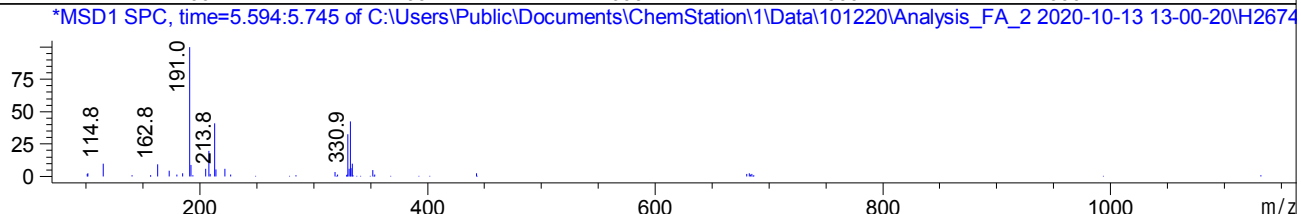

RT 6.918

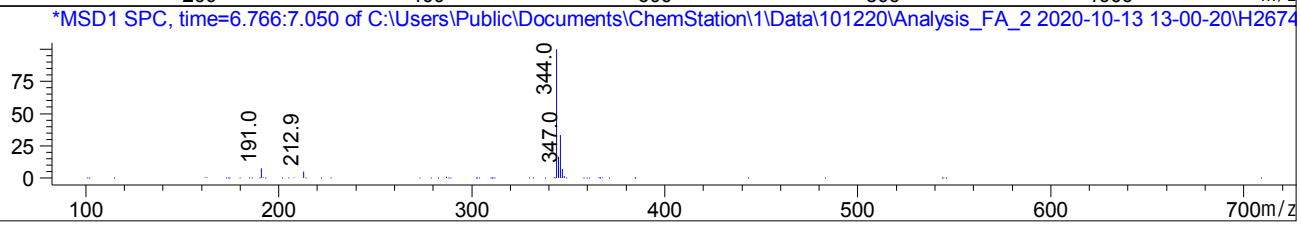

H2674289

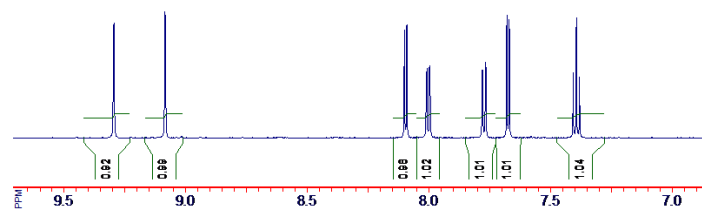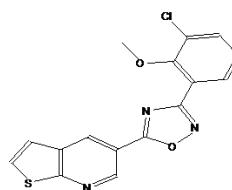

H2674289 C16H10ClN3O2S 343.79

# Compound 31

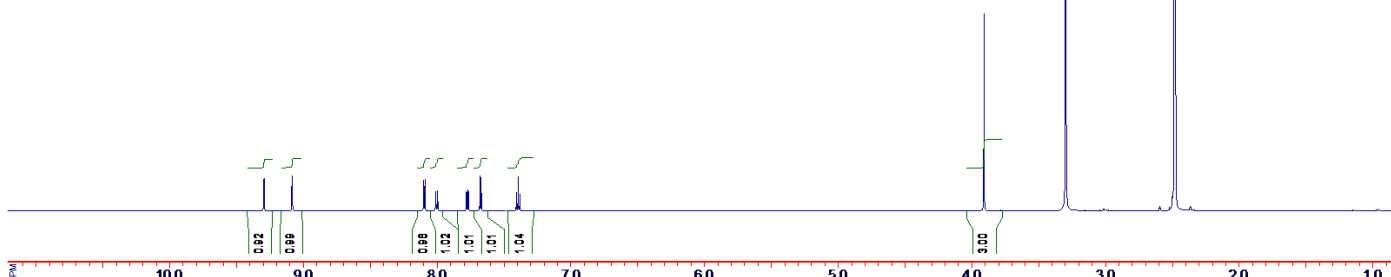

|                     |               |                  |           |                            |           |
|---------------------|---------------|------------------|-----------|----------------------------|-----------|
| File name: H2674289 | Host: Hachar  | SF: 599.7811 MHz | NSC: 0    | PW: 4.40 usec, RG: 44      | SE 131072 |
| Date: 26-Nov-2020   | Solvent: dmso | SW: 11364 Hz     | TE: 298 K | AQ: 2.82 sec, RD: 0.00 sec | H2674289  |

# Compound 32

MaxPeak: 100.00%  
Ret\_Time: 1.254 min

## S491339\$5

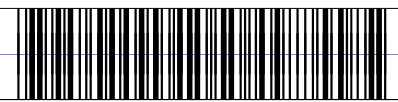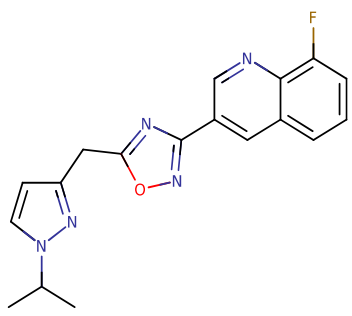

Mol Wt 337.35  
Exact Mass 337.15

| # | Time  | Area%  |
|---|-------|--------|
| 1 | 1.254 | 100.00 |

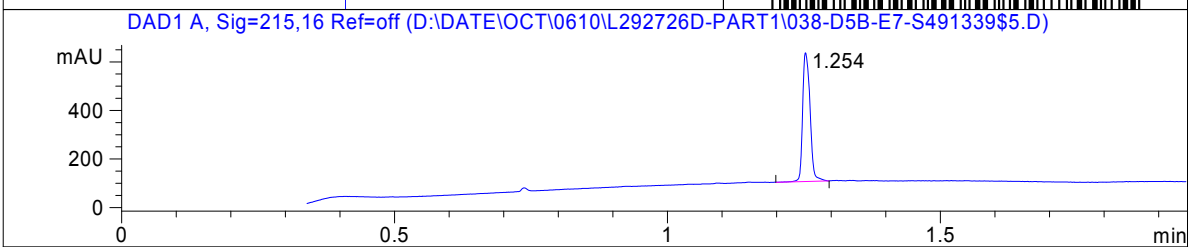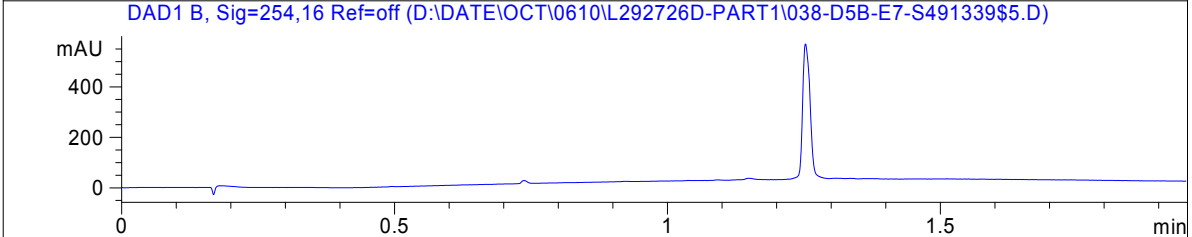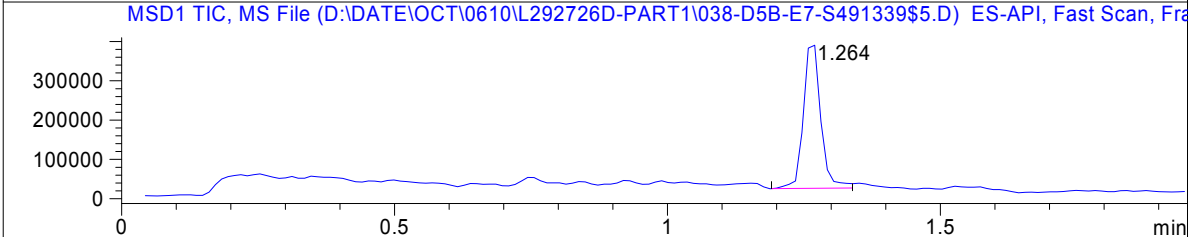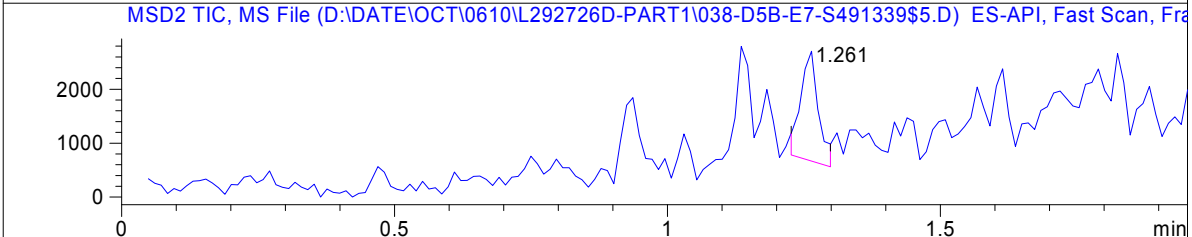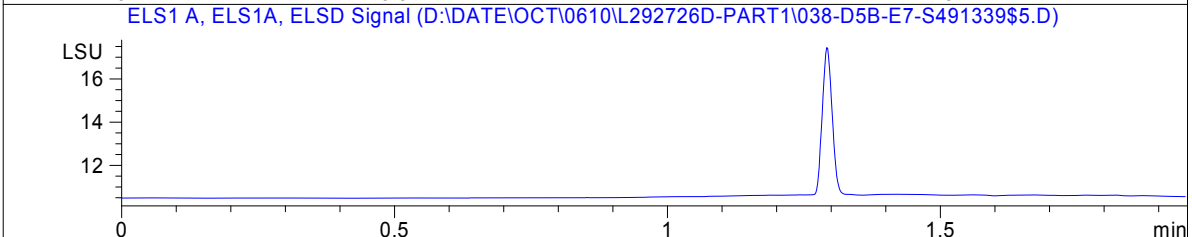

RT 1.264

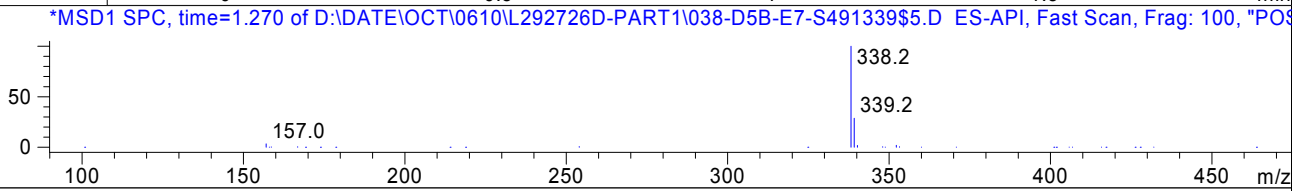

RT 1.261

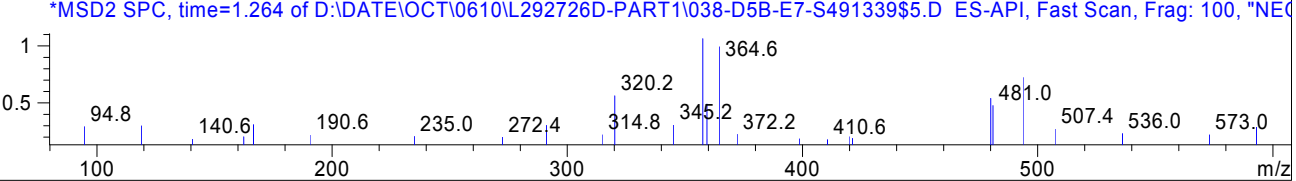

H2665602

# Compound 32

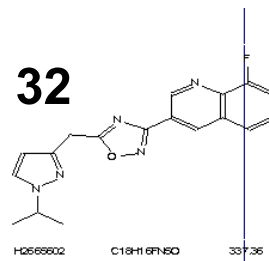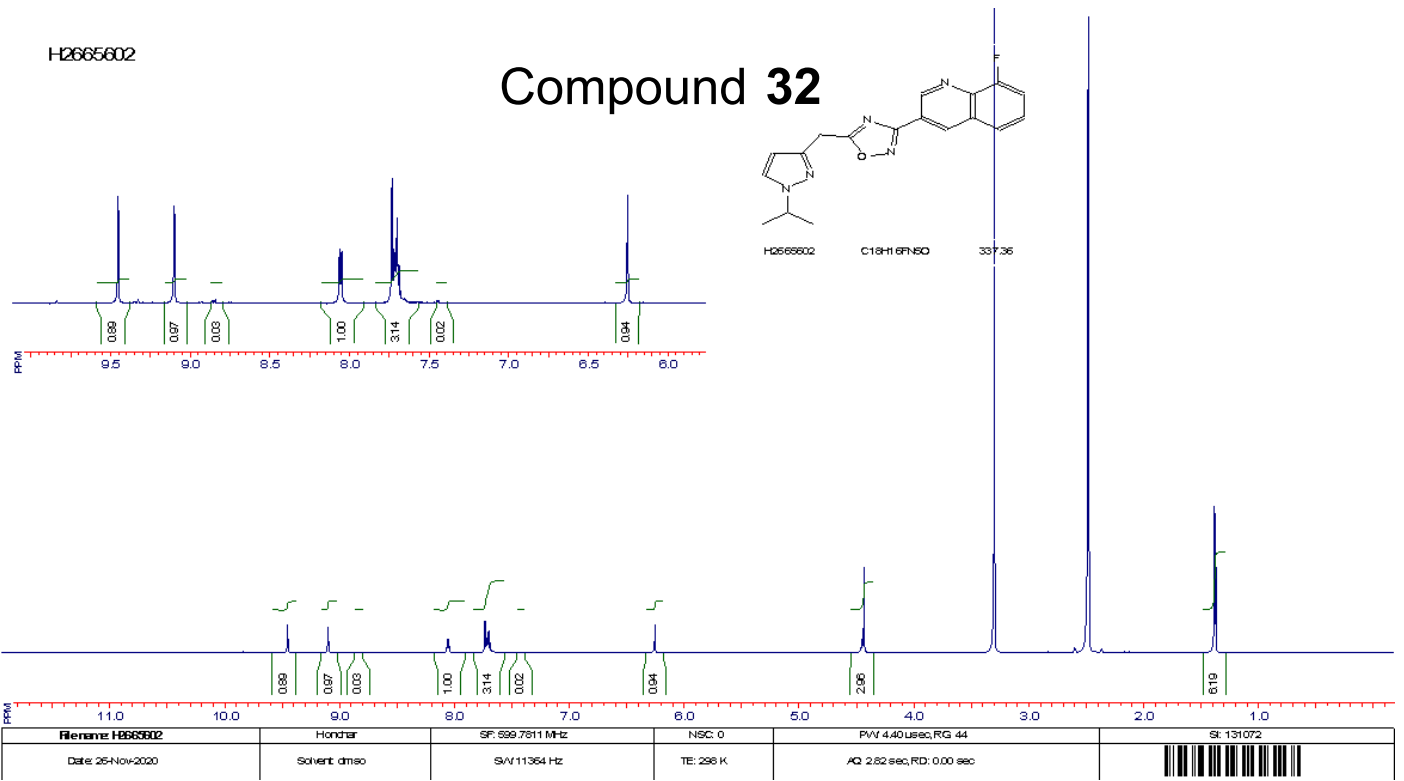

|                    |               |                  |           |                            |                                                                                       |
|--------------------|---------------|------------------|-----------|----------------------------|---------------------------------------------------------------------------------------|
| Filename: H2665602 | Holder        | SF: 599.7811 MHz | NSC: 0    | PW: 4.40 usec, RG: 44      | SI: 131072                                                                            |
| Date: 25-Nov-2020  | Solvent: dms0 | SN: 11364 Hz     | TE: 296 K | AQ: 2.82 sec, RD: 0.00 sec |  |

# Compound 33

MaxPeak: 100.00%  
Ret\_Time: 1.449 min

## S089995\$3

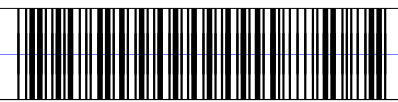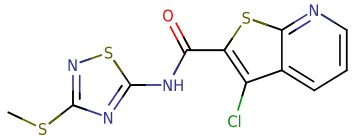

Mol Wt 342.85  
Exact Mass 341.94

| # | Time  | Area%  |
|---|-------|--------|
| 1 | 1.449 | 100.00 |

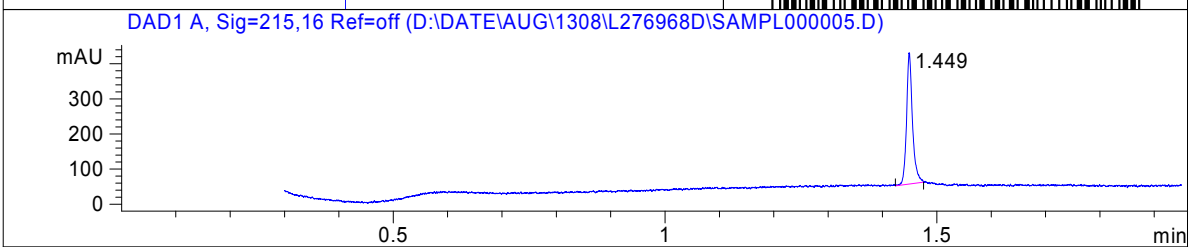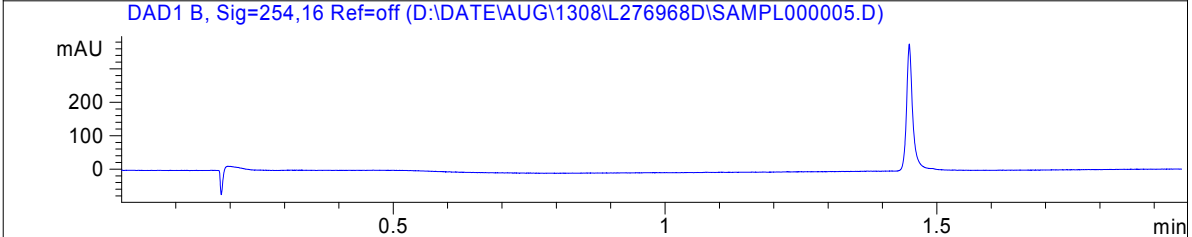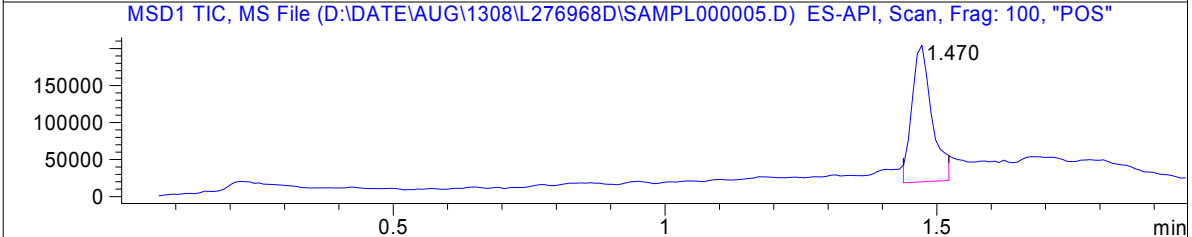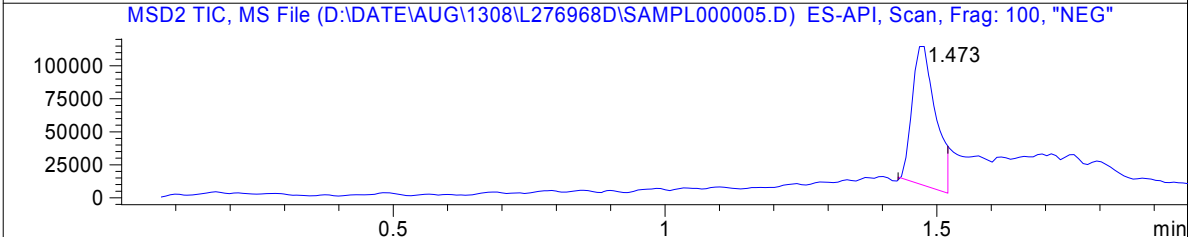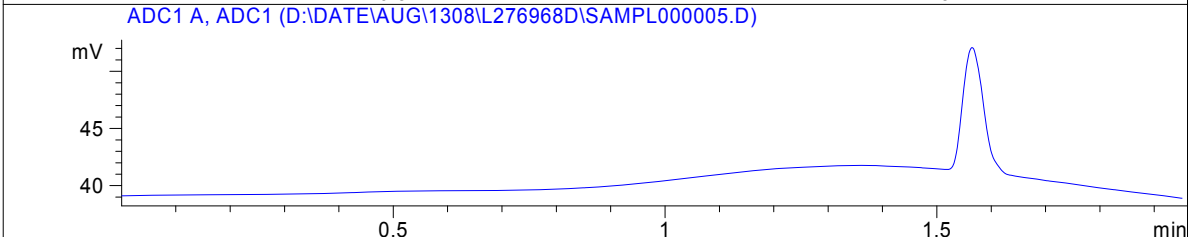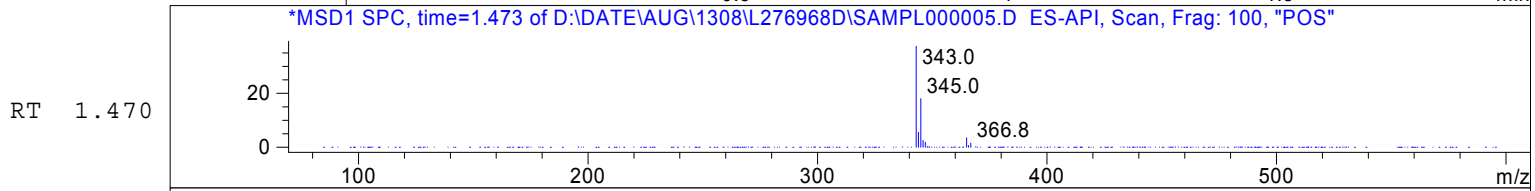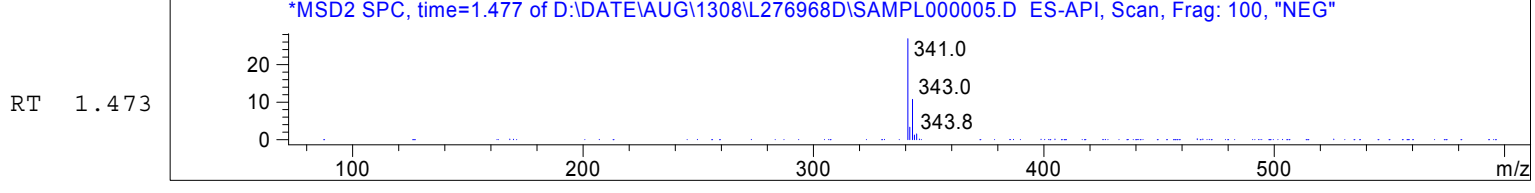

SVK-6.10.fid  
SVK 6 in d6-DMSO;  
1H

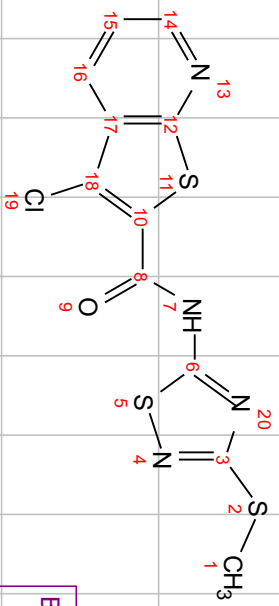

# Compound 33

$C_{11}H_{12}ClN_4OS_3$

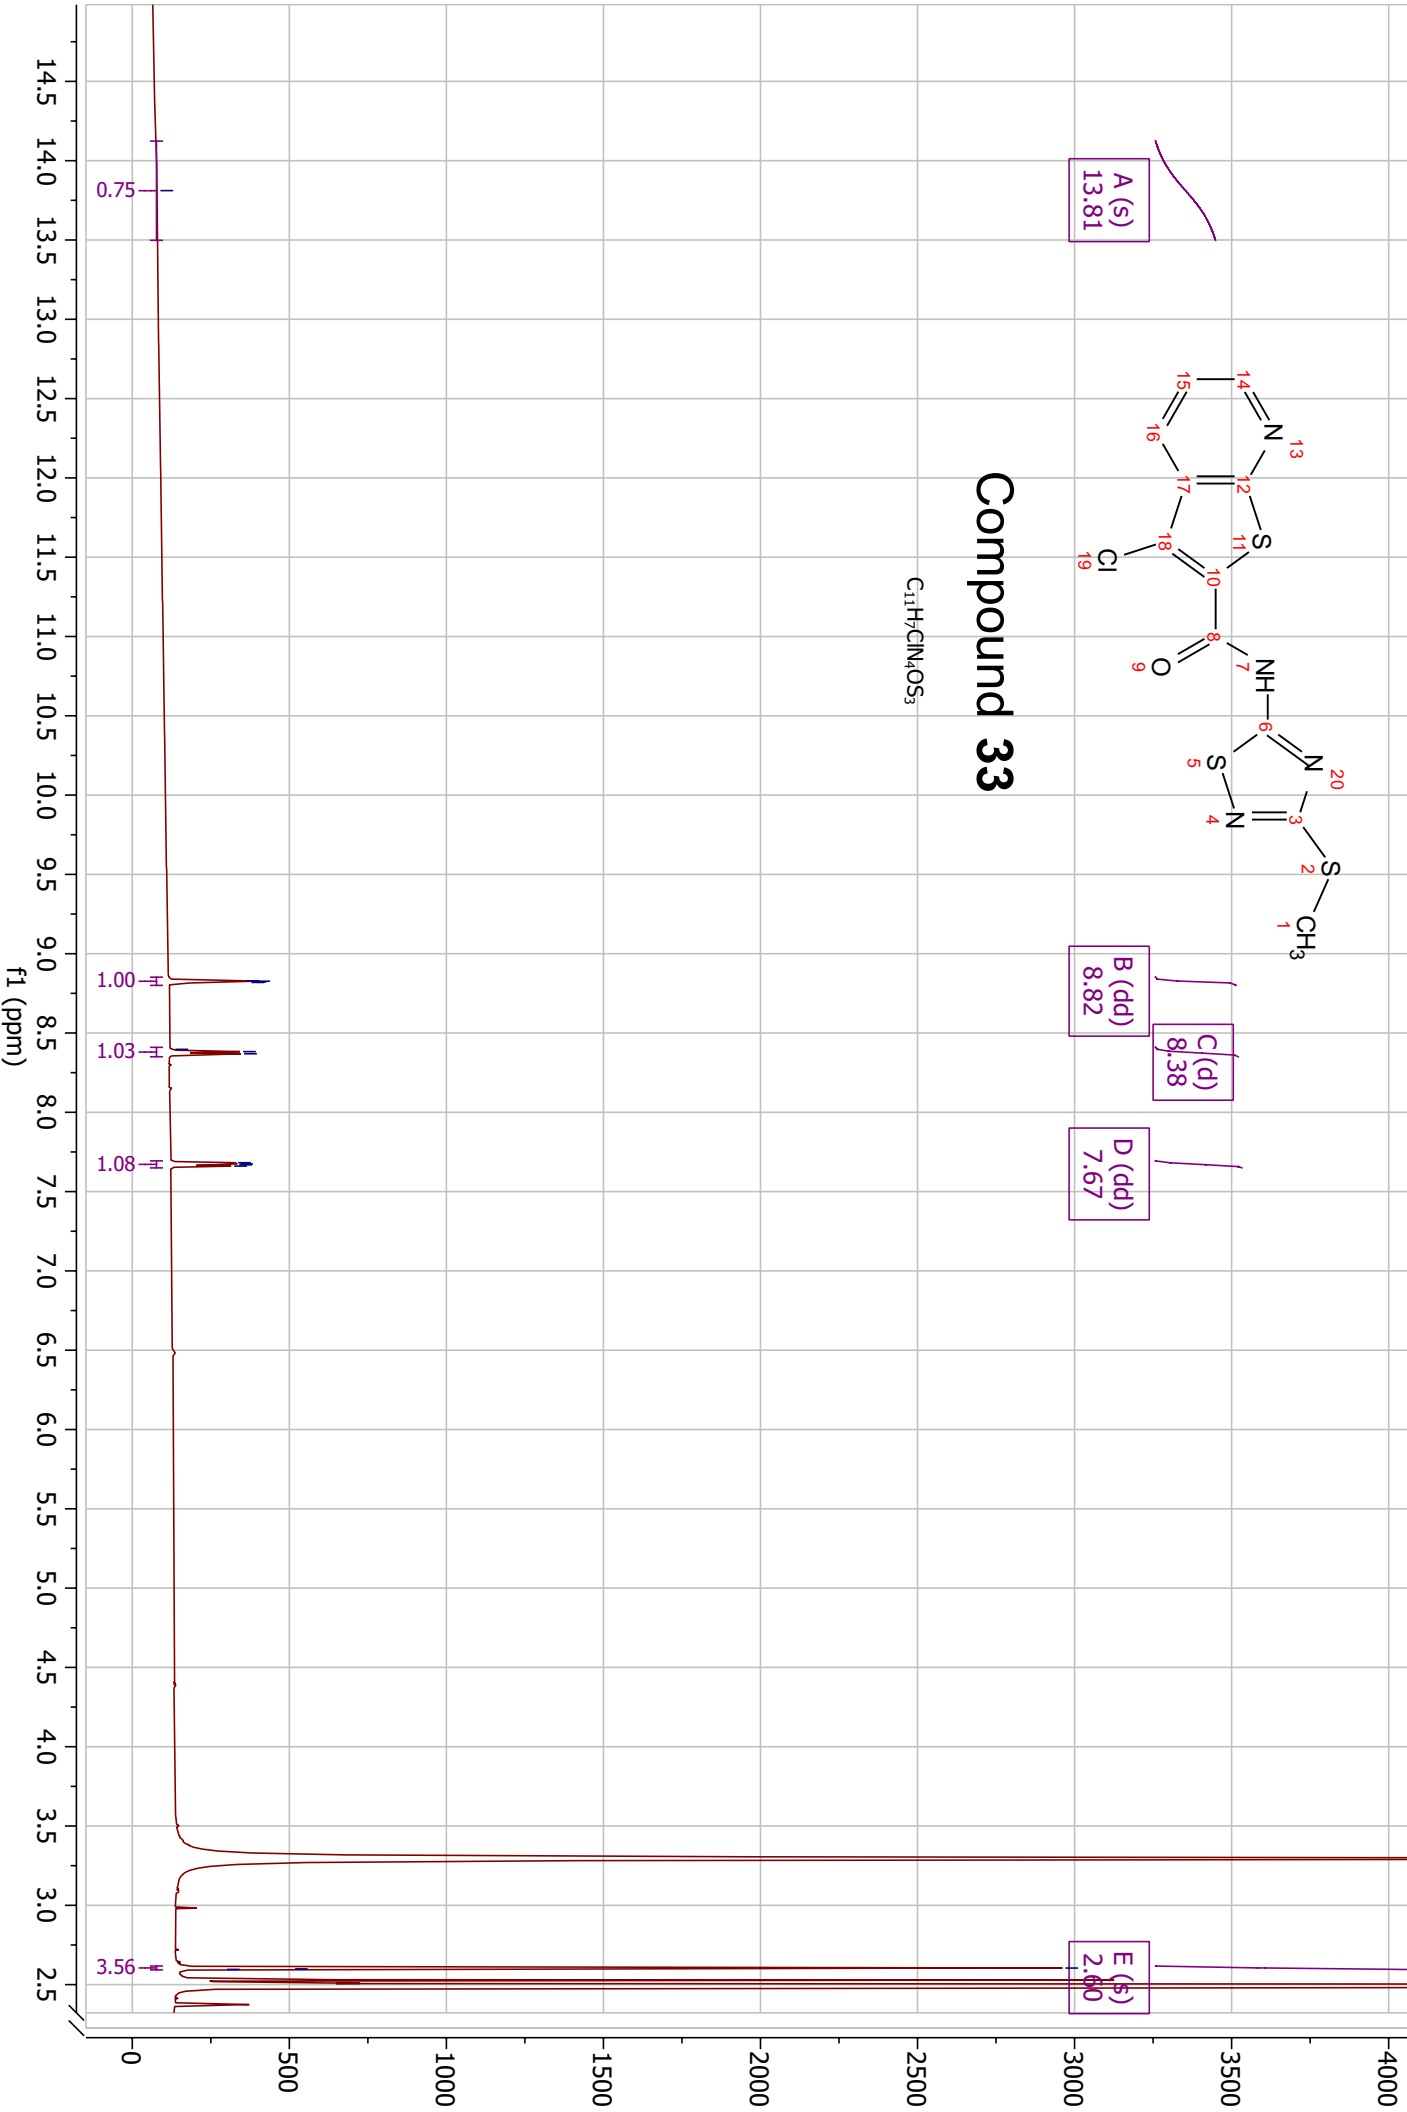

8.83  
8.83  
8.82  
8.82  
8.40  
8.38  
8.37  
7.68  
7.67  
7.67  
7.66

2.60  
2.60  
2.60
